# Supplementary material for: Maintenance of cell wall remodeling and vesicle production are connected in Mycobacterium tuberculosis
Source: bioRxiv preprint, doi:10.1101/2023.11.19.567727, version 4 (2024-11-27)
Supplement: SupFileS1 [file 567727_file06.xlsx]

## Sheet: KO_minus_WT_at_WCL
Gene	baseMean	logFC	logFC_SE	stat	p	fdr	logFC_shrunken
35kd_ag	9304.24	-0.370402	0.0734143	-5.04537	4.52647e-07	1.74631e-06	-0.320122
PE1	1335.56	-0.249073	0.11271	-2.20986	0.0271149	0.0269701	-0.164142
PE10	50.9009	-0.495142	0.486601	-1.01755	0.308891	0.179577	-0.0687606
PE12	7432.19	-0.0303477	0.0568917	-0.53343	0.593736	0.279751	-0.0258228
PE13	6528.2	-0.399152	0.0963065	-4.1446	3.4041e-05	8.7989e-05	-0.317271
PE14	286.327	0.182763	0.0884449	2.06641	0.0387901	0.0360737	0.135881
PE15	498.445	-0.533096	0.101446	-5.25495	1.48066e-07	6.15414e-07	-0.468082
PE16	1706.88	-0.127715	0.0557415	-2.29119	0.0219522	0.0227799	-0.111494
PE17	3346.52	-0.302248	0.0629012	-4.80513	1.54655e-06	5.29779e-06	-0.26449
PE18	263.038	0.262176	0.113396	2.31205	0.0207751	0.0219085	0.17308
PE19	3558.19	-0.29892	0.0577152	-5.17922	2.22812e-07	8.99692e-07	-0.26674
PE2	631.553	-0.0585301	0.167835	-0.348735	0.727288	0.32049	-0.0263472
PE20	60.3769	-1.28361	0.298975	-4.29338	1.75976e-05	4.85454e-05	-1.09354
PE21	72.5564	-0.0266672	0.222619	-0.119788	0.904651	0.367552	-0.00885931
PE22	106.093	-0.609081	0.265447	-2.29455	0.0217589	0.0226752	-0.227648
PE23	1476.53	0.155451	0.057974	2.68138	0.00733186	0.00930591	0.134838
PE24	102.935	-0.0544623	0.151386	-0.359758	0.719028	0.318019	-0.0270224
PE25	4327.36	0.411266	0.0575184	7.15016	8.66792e-13	8.4438e-12	0.382993
PE26	3551.57	0.0802914	0.0339542	2.3647	0.0180447	0.0195585	0.0759447
PE27	200.828	0.000446011	0.130303	0.00342286	0.997269	0.390448	0.000250958
PE3	1425.59	-0.0360558	0.107002	-0.336964	0.736144	0.323296	-0.0234032
PE31	75994.7	-0.0751344	1.00696	-0.0746148	0.940521	0.376342	-0.00393891
PE33	74.4749	-0.104293	0.179629	-0.580602	0.561509	0.270286	-0.0440823
PE34	138.171	0.0720512	0.194926	0.369633	0.711656	0.315654	0.0278305
PE35	3702.21	-0.0812215	0.041099	-1.97624	0.0481278	0.0427722	-0.0748628
PE36	891.579	-0.0555703	0.0700944	-0.792793	0.427898	0.223954	-0.0445589
PE5	553.36	-0.287341	0.103579	-2.77412	0.00553521	0.00735494	-0.203466
PE6	350.54	-0.020196	0.0849703	-0.237683	0.812127	0.344437	-0.0148947
PE7	178.09	-0.258288	0.11555	-2.23529	0.025398	0.0255559	-0.168017
PE8	67.3151	-0.388346	0.346473	-1.12085	0.26235	0.160425	-0.0817419
PE_PGRS1	407.559	0.0710964	0.121209	0.586562	0.557498	0.26902	0.0424607
PE_PGRS10	287.614	-0.268259	0.168919	-1.58809	0.112265	0.084287	-0.126837
PE_PGRS11	793.447	-0.877106	0.0737869	-11.887	1.38247e-32	8.51607e-31	-0.865141
PE_PGRS12	394.446	0.214546	0.100357	2.13782	0.0325312	0.0312603	0.150214
PE_PGRS13	1135.4	0.338007	0.0944732	3.57781	0.000346485	0.000695931	0.259166
PE_PGRS14	1123.18	-0.335554	0.0971994	-3.45222	0.000555989	0.00105423	-0.253166
PE_PGRS15	3072.51	-0.306718	0.0928284	-3.30414	0.000952671	0.00166864	-0.232969
PE_PGRS16	1397.41	-0.200024	0.065626	-3.04793	0.00230421	0.00351862	-0.168531
PE_PGRS17	309.885	0.40669	0.108977	3.73188	0.000190058	0.000411431	0.304695
PE_PGRS18	2862.26	0.36611	0.055953	6.54317	6.02287e-11	4.51319e-10	0.336366
PE_PGRS19	141.433	-0.203867	0.159534	-1.27789	0.201288	0.13233	-0.099272
PE_PGRS2	114.65	0.126823	0.265121	0.47836	0.632394	0.291618	0.0346011
PE_PGRS20	79.1688	0.0405694	0.313431	0.129436	0.897012	0.365137	0.00892715
PE_PGRS21	505.851	-0.0766648	0.0805081	-0.952261	0.340964	0.191647	-0.0583251
PE_PGRS22	305.969	-0.00542721	0.124285	-0.0436673	0.96517	0.383174	-0.0031682
PE_PGRS23	142.351	0.170362	0.226446	0.75233	0.451853	0.23274	0.0565589
PE_PGRS24	276.852	0.265794	0.0925849	2.87081	0.0040942	0.00570782	0.198317
PE_PGRS25	1570.58	-0.416775	0.133419	-3.12381	0.00178525	0.00282205	-0.274054
PE_PGRS26	152.135	0.0923022	0.126991	0.726839	0.467325	0.237724	0.0533522
PE_PGRS27	168.432	0.153298	0.288784	0.530839	0.59553	0.280342	0.0378166
PE_PGRS28	223.385	0.124535	0.237197	0.525029	0.599563	0.281475	0.0388073
PE_PGRS29	296.679	-0.0234062	0.141119	-0.165862	0.868266	0.359826	-0.0123349
PE_PGRS3	317.444	0.007534	0.0970222	0.0776523	0.938105	0.375683	0.00518331
PE_PGRS30	1294.72	0.0249276	0.0767589	0.324752	0.745369	0.325513	0.0192328
PE_PGRS31	1220.58	0.144694	0.069414	2.0845	0.0371145	0.0349323	0.118437
PE_PGRS32	929.723	-0.247283	0.193553	-1.2776	0.20139	0.132332	-0.100421
PE_PGRS33	1159.64	0.0759517	0.0862008	0.881103	0.378262	0.206577	0.0559507
PE_PGRS34	284.722	0.282266	0.0964279	2.92722	0.00342006	0.00489946	0.207645
PE_PGRS35	1968.46	-0.25344	0.0748403	-3.38641	0.000708138	0.0013031	-0.206756
PE_PGRS36	113.797	0.0597051	0.421428	0.141673	0.887338	0.363382	0.00905069
PE_PGRS37	155.579	0.298999	0.116612	2.56406	0.0103456	0.0122251	0.197381
PE_PGRS38	4746.28	0.041703	0.0778037	0.536003	0.591957	0.279327	0.0320447
PE_PGRS39	2159.94	-0.120002	0.0710342	-1.68936	0.0911511	0.0719346	-0.0969308
PE_PGRS4	192.954	0.131202	0.116237	1.12875	0.259003	0.158871	0.0815698
PE_PGRS40	50.709	-0.0354604	0.263505	-0.134572	0.89295	0.36415	-0.00965992
PE_PGRS41	11246.4	0.263147	0.081475	3.22979	0.00123882	0.00208742	0.208226
PE_PGRS42	188.284	0.0245419	0.595664	0.0412009	0.967136	0.383369	0.00241681
PE_PGRS43	322.946	0.182417	0.453884	0.401903	0.687755	0.30901	0.0254733
PE_PGRS44	1922.53	0.0853647	0.0997745	0.855576	0.392233	0.210301	0.0581661
PE_PGRS45	365.326	0.277092	0.138747	1.9971	0.0458143	0.0412284	0.15797
PE_PGRS46	771.763	0.00434662	0.319625	0.0135991	0.98915	0.388245	0.000932536
PE_PGRS47	621.915	-0.027417	0.0907355	-0.302164	0.762527	0.329975	-0.0195776
PE_PGRS48	505.325	-0.0934535	0.0923241	-1.01223	0.311427	0.180245	-0.0666326
PE_PGRS5	2372.29	0.162439	0.113908	1.42605	0.153853	0.107582	0.103195
PE_PGRS50	106.085	0.0402332	0.346211	0.11621	0.907486	0.367768	0.00781331
PE_PGRS51	858.596	-0.0327197	0.0597429	-0.547676	0.583915	0.276816	-0.0274972
PE_PGRS52	72.5832	0.164554	0.187698	0.876698	0.380651	0.207281	0.0672306
PE_PGRS53	710.583	0.0390941	0.0907889	0.430604	0.666756	0.302277	0.02793
PE_PGRS54	1259.04	-0.0406064	0.0810741	-0.500856	0.616472	0.286907	-0.0306473
PE_PGRS55	321.702	-0.0613769	0.0971868	-0.631535	0.527691	0.258559	-0.0423349
PE_PGRS56	35.9055	0.465587	0.412706	1.12813	0.259264	0.158905	0.0800779
PE_PGRS57	1018.41	-0.0316091	0.0679928	-0.464888	0.642011	0.29518	-0.0255315
PE_PGRS58	171.943	0.0478042	0.195394	0.244655	0.806723	0.342798	0.0183805
PE_PGRS59	910.053	0.144289	0.103012	1.4007	0.161305	0.111571	0.0975064
PE_PGRS6	525.56	0.147628	0.366242	0.40309	0.686882	0.308796	0.0269598
PE_PGRS60	108.416	0.145038	0.147499	0.983317	0.325451	0.185847	0.0746901
PE_PGRS61	41.7589	0.0521163	0.221596	0.235186	0.814064	0.345165	0.0174281
PE_PGRS62	1856.04	-0.16291	0.113277	-1.43816	0.150389	0.105945	-0.103907
PE_PGRS7	5346.6	-0.0457491	0.0835857	-0.547332	0.584151	0.276816	-0.0340691
PE_PGRS8	206.803	0.0153036	0.124575	0.122846	0.902229	0.366782	0.0089193
PE_PGRS9	107.28	0.112211	0.339756	0.330271	0.741195	0.3246	0.0224378
PPE1	152.058	-1.04766	0.336412	-3.11423	0.00184427	0.00289479	-0.55458
PPE10	1362.97	0.0944234	0.0742047	1.27247	0.203205	0.133132	0.0746044
PPE11	619.045	0.095332	0.136303	0.699414	0.484293	0.243025	0.0520722
PPE12	3548.69	-0.220026	0.0985319	-2.23304	0.0255462	0.0256554	-0.155998
PPE13	1715.39	-0.0247263	0.100213	-0.246738	0.805111	0.342325	-0.0167033
PPE14	263.076	-0.105259	0.0992901	-1.06011	0.289093	0.171981	-0.0721639
PPE15	268.425	0.262375	0.104661	2.50691	0.0121792	0.0140303	0.182437
PPE16	603.358	-0.273874	0.297295	-0.921218	0.356937	0.198619	-0.0672142
PPE17	5197.56	-1.28013	0.229446	-5.5792	2.41627e-08	1.17323e-07	-1.1969
PPE18	26155.1	-0.24259	0.0855112	-2.83694	0.00455477	0.00624796	-0.18656
PPE19	31000.8	-0.166699	0.081427	-2.04722	0.0406369	0.0374117	-0.128455
PPE2	3421.78	0.0861225	0.042063	2.04747	0.0406123	0.0374111	0.0791661
PPE20	5220.99	-0.438893	0.0586504	-7.48321	7.25266e-14	8.13253e-13	-0.412193
PPE21	1892.66	0.135206	0.12138	1.11391	0.265318	0.161789	0.0815176
PPE22	226.324	0.292533	0.1354	2.16051	0.0307333	0.0299761	0.171688
PPE23	415.024	-0.114684	0.0936759	-1.22426	0.220853	0.140789	-0.0814341
PPE24	3704.14	-0.307767	0.354574	-0.867992	0.385399	0.209228	-0.0608306
PPE25	1084.91	0.0240515	0.123277	0.195101	0.845314	0.353131	0.0141333
PPE26	3191.57	-0.0219194	0.0598702	-0.366115	0.714279	0.316367	-0.0183835
PPE27	586.946	-0.442785	0.191356	-2.31393	0.0206713	0.0218138	-0.209303
PPE28	2087.11	-0.107339	0.0656845	-1.63416	0.102224	0.0786815	-0.0889389
PPE29	195.33	-0.500829	0.291576	-1.71766	0.0858587	0.0685287	-0.143935
PPE3	1477.05	-0.766992	0.0645358	-11.8848	1.42059e-32	8.51607e-31	-0.756327
PPE30	504.544	0.137913	0.208796	0.660513	0.508924	0.251578	0.0498753
PPE31	316.317	-0.000235846	0.105206	-0.00224176	0.998211	0.390698	-0.000154566
PPE32	1275.71	-0.380009	0.0820892	-4.62921	3.67055e-06	1.15576e-05	-0.318356
PPE33	2919.19	-0.227555	0.0482414	-4.71701	2.3934e-06	7.82059e-06	-0.207353
PPE34	2751.8	-0.434193	0.399357	-1.08723	0.276936	0.167043	-0.0769859
PPE35	6596.19	-0.0530485	0.0848447	-0.625243	0.531812	0.259843	-0.0392588
PPE36	1219.62	-0.422583	0.0958865	-4.40712	1.04756e-05	2.9904e-05	-0.343488
PPE37	609.419	0.0545058	0.0905501	0.601941	0.547214	0.265289	0.0390518
PPE38	2143.03	-0.275665	0.405136	-0.680426	0.496235	0.247187	-0.0453579
PPE39	70.374	-1.09053	0.882319	-1.23598	0.216466	0.138901	-0.080954
PPE4	6211.49	-0.461802	0.0773049	-5.97378	2.31822e-09	1.33824e-08	-0.416766
PPE40	6837.89	-0.18428	0.0775502	-2.37627	0.0174885	0.0190719	-0.145628
PPE41	11826.2	0.318774	0.0589762	5.40513	6.47629e-08	2.96887e-07	0.284885
PPE42	2269.13	-0.0464479	0.0450147	-1.03184	0.302148	0.176778	-0.041686
PPE43	274.025	-0.00776569	0.140063	-0.0554442	0.955785	0.380612	-0.0041173
PPE44	1939.76	0.0596799	0.0621891	0.959651	0.337231	0.190235	0.0498275
PPE45	413.133	0.0217715	0.128045	0.17003	0.864987	0.35904	0.012425
PPE49	1623.03	-0.0694471	0.164931	-0.421067	0.673706	0.304542	-0.0318311
PPE5	3300.49	-0.415206	0.317069	-1.30951	0.19036	0.126795	-0.0999085
PPE50	4644.75	0.586731	0.0684886	8.56684	1.06362e-17	1.88385e-16	0.567502
PPE51	9507.6	0.495878	0.0650481	7.62325	2.47363e-14	2.92081e-13	0.46978
PPE52	4187.87	-0.167543	0.0611608	-2.73939	0.00615541	0.00805168	-0.143431
PPE53	18435.8	-3.02368	0.705725	-4.28451	1.83146e-05	5.01682e-05	-1.97722
PPE55	12592.6	-0.268479	0.125024	-2.14742	0.0317602	0.0307278	-0.165707
PPE56	6256.62	-0.283263	0.32335	-0.876028	0.381015	0.207281	-0.0626071
PPE57	456.935	0.0524417	0.113282	0.462928	0.643416	0.295253	0.0328102
PPE58	415.668	-0.0812348	0.126013	-0.644656	0.51915	0.25566	-0.0471664
PPE59	3074.63	0.000462139	0.0874129	0.00528685	0.995782	0.39016	0.000336027
PPE6	2698.78	-0.275685	0.0880959	-3.12938	0.00175176	0.00278891	-0.211676
PPE60	74534.4	-0.196455	0.0875635	-2.24357	0.02486	0.0251351	-0.147325
PPE61	321.479	-0.234801	0.265559	-0.884176	0.376601	0.206248	-0.0655491
PPE62	821.952	-0.402669	0.263801	-1.52641	0.126907	0.0930389	-0.122899
PPE63	737.8	-0.0763131	0.0841035	-0.907371	0.364211	0.201313	-0.0568943
PPE64	862.93	-0.211996	0.18583	-1.14081	0.253951	0.156696	-0.0887588
PPE65	199.451	-0.0593056	0.113192	-0.523937	0.600322	0.281747	-0.0371486
PPE66	1349.58	0.0519897	0.0702637	0.739922	0.459348	0.235201	0.0416277
PPE67	410.951	0.111201	0.122946	0.904476	0.365743	0.201791	0.0660917
PPE68	8797.23	0.106023	0.053315	1.98861	0.0467447	0.0418159	0.0932606
PPE69	612.354	0.143343	0.0772283	1.85609	0.0634407	0.0538859	0.11249
PPE7	1428.37	-0.204664	0.0845211	-2.42146	0.0154585	0.0171244	-0.156468
PPE8	7823.84	-0.191574	0.230607	-0.830741	0.40612	0.216259	-0.0625988
PPE9	227.504	0.232257	0.107977	2.15098	0.031478	0.0305057	0.156396
Rv0004	1237.38	0.177172	0.0574998	3.08126	0.00206129	0.00320638	0.154449
Rv0007	3968.19	0.0245248	0.043018	0.570105	0.568607	0.272356	0.022012
Rv0008c	348.681	0.0391832	0.102953	0.380592	0.703506	0.313467	0.0260635
Rv0010c	5623.6	0.358777	0.0389888	9.20204	3.51207e-20	7.60281e-19	0.344117
Rv0011c	2836.48	0.249004	0.0734031	3.39227	0.000693149	0.00127854	0.204317
Rv0012	2171.3	0.165691	0.0531249	3.11889	0.00181534	0.00286091	0.147015
Rv0021c	1273.01	0.173014	0.0641346	2.69766	0.00698282	0.00893799	0.146148
Rv0023	331.616	0.128386	0.0918176	1.39827	0.162031	0.111894	0.0924201
Rv0024	492.112	0.0268172	0.0845538	0.317161	0.751121	0.327108	0.0198312
Rv0025	543.255	-0.027448	0.0705494	-0.38906	0.697232	0.31183	-0.0218778
Rv0026	1767.87	0.00860467	0.0510575	0.168529	0.866167	0.359311	0.00748051
Rv0027	497.405	-0.066035	0.0720579	-0.916416	0.359449	0.199447	-0.0525021
Rv0028	920.421	0.058378	0.0708633	0.823811	0.410047	0.217607	0.0466454
Rv0029	1663.08	0.0448915	0.0735399	0.610437	0.541572	0.263209	0.0353007
Rv0030	669.178	-0.235953	0.113677	-2.07564	0.0379276	0.0355259	-0.153752
Rv0031	342.543	-0.135294	0.104602	-1.29342	0.195865	0.129857	-0.0903726
Rv0034	352.31	0.298539	0.112327	2.65777	0.00786606	0.00986346	0.202099
Rv0036c	1809.66	0.113712	0.0530765	2.14242	0.03216	0.0309991	0.100264
Rv0037c	2014.85	0.00689975	0.067618	0.10204	0.918725	0.370346	0.00557361
Rv0038	2888.52	-0.039831	0.0530091	-0.7514	0.452412	0.232797	-0.0345324
Rv0039c	466.952	0.169882	0.159135	1.06753	0.285731	0.170763	0.0820706
Rv0042c	1995.44	-0.0185623	0.0487516	-0.380752	0.703387	0.313467	-0.016299
Rv0043c	1090.52	-0.0549971	0.0816854	-0.67328	0.500769	0.248651	-0.0414362
Rv0044c	848.982	-0.0610052	0.077655	-0.785593	0.432106	0.225475	-0.0470315
Rv0045c	4081.55	0.0467052	0.042324	1.10351	0.269804	0.163794	0.0423576
Rv0047c	5961.74	0.00931715	0.0649011	0.143559	0.885848	0.363342	0.00762657
Rv0048c	1682.83	0.0760328	0.0723096	1.05149	0.293033	0.173464	0.0604781
Rv0049	1922.43	-0.0516866	0.0582916	-0.886689	0.375246	0.20579	-0.0438859
Rv0051	2788.48	0.0969352	0.0645511	1.50168	0.13318	0.0965927	0.0806148
Rv0052	864.509	0.144089	0.0665816	2.1641	0.030457	0.0297812	0.119661
Rv0057	1272.96	0.313319	0.0944932	3.31578	0.000913867	0.00160584	0.236699
Rv0059	1772.43	0.159642	0.0743532	2.14708	0.0317873	0.0307349	0.127676
Rv0060	7352.39	-0.0124401	0.0487071	-0.255406	0.79841	0.340659	-0.0109158
Rv0061c	8962.95	0.256337	0.064861	3.9521	7.74688e-05	0.000185422	0.21941
Rv0063	847.853	0.227388	0.0711801	3.19455	0.00140049	0.00231725	0.187561
Rv0064	11630.7	-0.345736	0.0639932	-5.40269	6.56474e-08	3.00059e-07	-0.306338
Rv0067c	270.784	-0.0252735	0.105695	-0.239117	0.811015	0.344153	-0.0165243
Rv0068	546.585	0.108194	0.0740503	1.46109	0.143991	0.102302	0.0857869
Rv0071	833.386	0.185287	0.0792012	2.33945	0.0193121	0.020645	0.145154
Rv0072	4577.41	-0.0289881	0.0430068	-0.674035	0.500289	0.248581	-0.0260545
Rv0073	4934.36	0.0588729	0.0377515	1.55948	0.118882	0.0883189	0.0545875
Rv0074	2197.25	0.0517354	0.0946085	0.546836	0.584491	0.276817	0.0361923
Rv0075	3009.56	-0.0179981	0.0450855	-0.3992	0.689746	0.309459	-0.0160138
Rv0076c	1346.25	-0.125313	0.0520689	-2.40667	0.0160986	0.0177578	-0.111179
Rv0077c	472.952	-0.0245886	0.0843738	-0.291424	0.770727	0.332212	-0.018199
Rv0078	542.69	0.0124696	0.0946109	0.131799	0.895143	0.364737	0.00870153
Rv0078A	3320.5	-0.138642	0.0617982	-2.24346	0.0248669	0.0251351	-0.117807
Rv0078B	1211.06	-0.24677	0.0928266	-2.6584	0.00785133	0.00985292	-0.182511
Rv0079	2908.39	-1.09209	0.143876	-7.59048	3.18722e-14	3.73512e-13	-1.05691
Rv0080	2043.74	-1.90042	0.143694	-13.2254	6.25964e-40	6.09779e-38	-1.86727
Rv0081	213.768	-1.42533	0.194049	-7.34521	2.05442e-13	2.20834e-12	-1.37345
Rv0082	350.168	-0.72895	0.111732	-6.52408	6.8419e-11	5.05402e-10	-0.690297
Rv0083	385.504	-0.610332	0.105154	-5.80419	6.46771e-09	3.50027e-08	-0.559307
Rv0088	2465.69	-0.38527	0.058945	-6.53609	6.31477e-11	4.68685e-10	-0.353409
Rv0089	892.806	-0.276116	0.120419	-2.29295	0.0218509	0.0227201	-0.175932
Rv0090	187.724	-0.492123	0.292045	-1.68509	0.0919713	0.0724352	-0.140056
Rv0093c	680.897	0.0821447	0.0634997	1.29362	0.195796	0.129857	0.0684658
Rv0094c	4252.96	-0.635878	0.365863	-1.73802	0.0822065	0.0661143	-0.146981
Rv0095c	88.2632	-0.08731	0.201222	-0.433899	0.664362	0.301454	-0.0326342
Rv0097	606.531	-0.747088	0.152178	-4.90932	9.13928e-07	3.32822e-06	-0.660316
Rv0100	173.567	-0.535118	0.115289	-4.64154	3.45815e-06	1.0933e-05	-0.446029
Rv0102	2911.46	-0.0390924	0.0435014	-0.898647	0.368841	0.20286	-0.0351959
Rv0104	1594.81	-0.28653	0.0646572	-4.43153	9.35689e-06	2.70073e-05	-0.247614
Rv0106	821.42	-0.35044	0.0902525	-3.88289	0.000103223	0.000240848	-0.276851
Rv0108c	9661.53	-0.314376	0.0607156	-5.17786	2.24451e-07	9.03969e-07	-0.278671
Rv0110	692.342	-0.0894681	0.113665	-0.787123	0.43121	0.225309	-0.0560874
Rv0111	2163.91	0.169799	0.0506556	3.35204	0.000802195	0.00144881	0.152279
Rv0121c	221.547	-0.0537281	0.106657	-0.503748	0.614438	0.286165	-0.0349948
Rv0122	233.376	-0.405057	0.120176	-3.37052	0.000750259	0.00136828	-0.284538
Rv0123	670.477	-0.0835474	0.0751827	-1.11126	0.266458	0.162357	-0.0655278
Rv0128	1278.45	0.170352	0.0544791	3.12692	0.0017665	0.00280665	0.150356
Rv0133	1101.65	0.105328	0.0836921	1.25852	0.208203	0.135213	0.0791086
Rv0135c	2582.91	-0.0142349	0.0596281	-0.238729	0.811316	0.344187	-0.0119431
Rv0138	497.808	-0.198005	0.0873457	-2.26691	0.0233958	0.0239281	-0.148733
Rv0139	1787.93	-0.0780172	0.0430327	-1.81297	0.069836	0.0581456	-0.0713031
Rv0140	2025.61	-0.363611	0.0900468	-4.03802	5.39048e-05	0.00013315	-0.290116
Rv0141c	2752.88	-0.424087	0.0768745	-5.51661	3.45606e-08	1.6373e-07	-0.373927
Rv0142	888.778	0.0429915	0.100744	0.426742	0.669567	0.303286	0.0289838
Rv0143c	2504.81	0.0560858	0.0639292	0.877311	0.380318	0.207264	0.0463968
Rv0144	12410.1	-0.151736	0.0485188	-3.12736	0.00176384	0.00280528	-0.137028
Rv0145	10356.5	-0.0428489	0.0761691	-0.56255	0.573741	0.273639	-0.0332199
Rv0146	2500	-0.135093	0.0483719	-2.79281	0.00522527	0.00701487	-0.121885
Rv0147	7214.79	-0.151147	0.0445679	-3.39138	0.000695426	0.00128122	-0.13859
Rv0148	3862.34	-0.0382739	0.0505584	-0.757025	0.449035	0.231748	-0.033512
Rv0149	3912.17	-0.156256	0.0411506	-3.79717	0.00014636	0.00032918	-0.145093
Rv0150c	547.376	0.0617864	0.0771304	0.801063	0.423095	0.222336	0.0477754
Rv0157A	535.941	-0.259541	0.106661	-2.43332	0.0149609	0.0167148	-0.178132
Rv0158	801.249	0.251715	0.073933	3.40464	0.000662514	0.00122493	0.206167
Rv0161	344.979	0.0365503	0.129559	0.282113	0.777857	0.334176	0.0206809
Rv0163	668.339	0.00426754	0.0741061	0.0575869	0.954078	0.380127	0.00333591
Rv0175	18005.5	0.0673697	0.059268	1.13669	0.255666	0.157319	0.0571412
Rv0176	4260.17	0.126724	0.0514941	2.46095	0.0138569	0.0156279	0.112734
Rv0177	6111.79	0.0931844	0.0305754	3.04769	0.00230608	0.00351862	0.0892023
Rv0178	7583.07	0.138526	0.028242	4.90497	9.34395e-07	3.37906e-06	0.133607
Rv0180c	2748.68	0.0245718	0.0439762	0.558752	0.576331	0.274568	0.0219815
Rv0181c	1033.59	-0.154721	0.0672686	-2.30004	0.0214458	0.0224487	-0.128282
Rv0183	1274	0.0864751	0.0553398	1.56262	0.118141	0.0879785	0.0750553
Rv0184	943.812	0.272495	0.0712523	3.82437	0.000131105	0.000297013	0.227557
Rv0185	529.467	0.130516	0.0982059	1.329	0.183847	0.123673	0.0905056
Rv0187	825.451	0.209941	0.0729392	2.8783	0.0039982	0.00558414	0.17095
Rv0188	4101.26	-0.571404	0.0739635	-7.72549	1.11422e-14	1.36017e-13	-0.546742
Rv0190	3656.4	0.536703	0.105736	5.07588	3.85705e-07	1.50293e-06	0.46551
Rv0191	2123.18	0.673714	0.0752104	8.95772	3.31465e-19	6.70949e-18	0.655983
Rv0192	2455.54	0.179161	0.0502396	3.56614	0.000362276	0.000720222	0.161095
Rv0193c	1332.9	-0.127475	0.105756	-1.20537	0.228062	0.144381	-0.0844167
Rv0194	661.457	-0.172919	0.161491	-1.07076	0.284277	0.170269	-0.0824402
Rv0195	101.113	-0.300293	0.28915	-1.03854	0.299019	0.175607	-0.0771158
Rv0196	91.2444	0.00722623	0.183083	0.0394697	0.968516	0.383721	0.00297202
Rv0197	631.582	0.0958302	0.095044	1.00827	0.313324	0.181074	0.0672693
Rv0199	800.713	-0.0592277	0.0631629	-0.937699	0.348399	0.194842	-0.0492109
Rv0200	1813.29	0.2602	0.0486324	5.35034	8.77889e-08	3.8983e-07	0.23797
Rv0201c	1672.23	0.188417	0.071813	2.62372	0.00869748	0.0106826	0.1536
Rv0203	699.387	0.103529	0.0957307	1.08146	0.279492	0.16826	0.0724754
Rv0204c	2417.5	0.102446	0.0696609	1.47063	0.14139	0.100951	0.0830648
Rv0205	1743.08	0.183809	0.043898	4.18719	2.82435e-05	7.4712e-05	0.169361
Rv0207c	8008.31	0.0978623	0.0460283	2.12613	0.0334924	0.0320063	0.0887254
Rv0208c	2554.3	0.0865517	0.0407041	2.12636	0.0334731	0.0320063	0.0799896
Rv0209	424.035	0.234919	0.104098	2.25671	0.0240262	0.0244598	0.162048
Rv0210	529.046	0.0582343	0.0763451	0.762778	0.445596	0.2304	0.0451968
Rv0213c	1378.74	-0.0802417	0.0785955	-1.02095	0.30728	0.179019	-0.0617341
Rv0216	792.189	-0.244679	0.0673376	-3.63362	0.000279476	0.000580026	-0.206457
Rv0218	598.696	-0.219194	0.191055	-1.14728	0.251266	0.155471	-0.0893151
Rv0219	98.7922	-0.127982	0.158765	-0.80611	0.420179	0.221476	-0.0613678
Rv0221	2618.32	-0.0349443	0.0512903	-0.681304	0.495679	0.247147	-0.0304798
Rv0223c	1762.64	-0.175058	0.0610176	-2.86897	0.00411813	0.00573606	-0.150131
Rv0224c	626.774	0.126479	0.0841051	1.50382	0.132629	0.0963276	0.0951678
Rv0225	2345.44	0.0419531	0.0556523	0.753843	0.450943	0.232348	0.0359738
Rv0226c	945.823	0.282196	0.0809464	3.48621	0.000489911	0.000942703	0.225527
Rv0227c	5176.73	0.0986483	0.0651893	1.51326	0.130214	0.0951054	0.0818019
Rv0228	1053.21	0.240152	0.0536032	4.48017	7.45821e-06	2.19332e-05	0.214815
Rv0229c	2319.17	0.216483	0.0526628	4.11074	3.94392e-05	0.000100116	0.19364
Rv0232	2398.5	0.346591	0.124442	2.78517	0.00534999	0.00715151	0.225443
Rv0235c	1322.35	0.13914	0.0656359	2.11987	0.034017	0.0324479	0.116005
Rv0236A	1543.56	0.106886	0.0684164	1.56228	0.118221	0.087996	0.0873107
Rv0238	2185.4	0.0109147	0.060463	0.180519	0.856745	0.356435	0.00912112
Rv0245	1743.07	0.00854527	0.0607504	0.140662	0.888137	0.363547	0.00713093
Rv0246	2636.62	0.0487825	0.085793	0.568607	0.569623	0.272623	0.0358919
Rv0247c	5275.37	0.0247413	0.0640209	0.386456	0.699159	0.312272	0.0203598
Rv0248c	10339.8	0.0812744	0.0389205	2.08822	0.0367784	0.0346787	0.0755401
Rv0249c	6778.44	-0.0661983	0.0684738	-0.966768	0.33366	0.188698	-0.0536256
Rv0250c	5475.87	-0.280808	0.101578	-2.76446	0.00570166	0.00755037	-0.200488
Rv0257	2805.13	0.00983844	0.0422431	0.232901	0.815839	0.345635	0.00882441
Rv0258c	580.381	-0.214439	0.0890376	-2.40841	0.0160224	0.0176862	-0.160292
Rv0259c	171.01	-0.165699	0.159297	-1.04019	0.298251	0.175288	-0.0798837
Rv0260c	122.016	-0.171571	0.298548	-0.574687	0.565503	0.27167	-0.040745
Rv0263c	687.454	-0.0552172	0.0791358	-0.697752	0.485332	0.243198	-0.0421922
Rv0264c	316.077	-0.000154097	0.100242	-0.00153724	0.998773	0.390743	-0.000104019
Rv0265c	957.637	0.185303	0.078135	2.37158	0.0177124	0.0192518	0.146008
Rv0268c	2524.01	-0.0812848	0.0944655	-0.860471	0.38953	0.209809	-0.0571221
Rv0269c	946.145	-0.134886	0.113078	-1.19286	0.232925	0.146625	-0.0855642
Rv0272c	3340.42	-0.0393047	0.0427823	-0.918713	0.358246	0.198999	-0.0354841
Rv0273c	967.995	-0.2425	0.0812782	-2.98358	0.00284894	0.00420497	-0.190761
Rv0274	2822.36	0.0860074	0.0774693	1.11021	0.266907	0.162567	0.0666496
Rv0275c	3062.75	-0.19813	0.0944475	-2.09778	0.0359249	0.034018	-0.142883
Rv0276	15274.7	-0.270325	0.0508458	-5.31657	1.05739e-07	4.54016e-07	-0.245748
Rv0281	2702.17	-0.335258	0.0624718	-5.36654	8.02596e-08	3.57415e-07	-0.297482
Rv0293c	4523.79	-0.127179	0.0722698	-1.75978	0.0784444	0.0637133	-0.102197
Rv0295c	1742.93	0.0885579	0.0614357	1.44147	0.149451	0.105498	0.0746759
Rv0296c	1693.77	0.0448481	0.0492273	0.911041	0.362274	0.200658	0.039555
Rv0298	1982.13	0.242071	0.0832174	2.9089	0.003627	0.0051486	0.188445
Rv0299	2470.74	0.227672	0.0729213	3.12216	0.00179527	0.00283216	0.18619
Rv0302	1258.21	0.078124	0.074705	1.04577	0.295669	0.174362	0.0613724
Rv0303	748.425	0.0140585	0.0710499	0.197868	0.843148	0.352604	0.0111666
Rv0306	433.119	-0.194373	0.0883171	-2.20086	0.027746	0.027503	-0.14506
Rv0307c	530.093	-0.175341	0.0785351	-2.23265	0.0255721	0.0256648	-0.137552
Rv0308	2164.82	-0.130605	0.0453759	-2.87829	0.00399831	0.00558414	-0.119201
Rv0309	7146.8	-0.0258804	0.0544685	-0.475144	0.634684	0.292415	-0.0222368
Rv0310c	1644.95	0.21341	0.0677454	3.15018	0.0016317	0.00264367	0.178449
Rv0311	827.755	0.0356719	0.0926867	0.384865	0.700337	0.31268	0.0252006
Rv0312	6502.77	0.0128719	0.0407891	0.315572	0.752327	0.327451	0.0116031
Rv0313	5646.35	-0.0851063	0.0427233	-1.99203	0.0463674	0.0415821	-0.0780104
Rv0314c	4760.3	0.01826	0.0561406	0.325255	0.744988	0.325438	0.0155619
Rv0315	5800.18	0.194447	0.057785	3.36501	0.000765408	0.00139043	0.169695
Rv0316	1418.74	0.304621	0.0788254	3.8645	0.000111318	0.000257425	0.248379
Rv0318c	519.823	-0.101539	0.115888	-0.876179	0.380933	0.207281	-0.0629131
Rv0320	435.005	-0.944013	0.0832824	-11.3351	8.79524e-30	4.42211e-28	-0.930154
Rv0323c	670.722	-0.528834	0.0835136	-6.33231	2.41517e-10	1.67305e-09	-0.488245
Rv0324	740.068	-1.13452	0.134221	-8.45267	2.84724e-17	4.57505e-16	-1.10595
Rv0325	394.655	-1.19692	0.141314	-8.46998	2.45441e-17	4.06971e-16	-1.16718
Rv0326	357.217	-1.2588	0.155786	-8.08034	6.45876e-16	9.67963e-15	-1.22402
Rv0328	1125.39	-0.0575408	0.077188	-0.745463	0.455992	0.234021	-0.044451
Rv0329c	545.158	-0.271111	0.0891298	-3.04176	0.00235202	0.00357303	-0.206612
Rv0330c	238.451	-0.372612	0.126546	-2.94448	0.00323493	0.0046729	-0.244524
Rv0331	5506.9	-2.2748	0.356462	-6.38161	1.75241e-10	1.22483e-09	-2.04982
Rv0332	2604.2	-1.42456	0.159146	-8.95125	3.51475e-19	7.02334e-18	-1.39053
Rv0333	695.175	-0.197801	0.0687099	-2.87879	0.00399204	0.00558414	-0.164102
Rv0336	5363.97	0.105085	0.0686131	1.53156	0.12563	0.0922768	0.0857208
Rv0338c	13469.6	0.125452	0.0487364	2.57409	0.0100504	0.0119762	0.112901
Rv0339c	1713.01	0.456372	0.0523651	8.71519	2.90272e-18	5.45092e-17	0.437032
Rv0340	1938.36	0.713432	0.0592882	12.0333	2.37521e-33	1.54253e-31	0.703665
Rv0345	1158.48	-0.0394189	0.0565989	-0.696461	0.48614	0.243403	-0.0336411
Rv0347	1906.11	-0.232652	0.082014	-2.83673	0.0045578	0.00624796	-0.181749
Rv0348	1746.29	-0.0910097	0.0607099	-1.49909	0.13385	0.0968987	-0.077059
Rv0349	1245	-0.282125	0.0884977	-3.18794	0.0014329	0.00236585	-0.21675
Rv0356c	837.102	0.0944732	0.0646172	1.46204	0.143729	0.102199	0.0785011
Rv0358	169.327	0.315492	0.122956	2.56589	0.0102911	0.0121884	0.202544
Rv0359	522.062	0.073161	0.0881403	0.830051	0.40651	0.216319	0.0532773
Rv0360c	249.638	-0.0578877	0.14429	-0.401189	0.688281	0.309157	-0.0299877
Rv0361	2613.46	-0.0368891	0.057533	-0.641182	0.521404	0.256284	-0.0313355
Rv0364	2489.58	0.0229695	0.0501739	0.457799	0.647097	0.295984	0.0200742
Rv0365c	1213.55	0.133985	0.0526285	2.54586	0.0109008	0.0128133	0.118714
Rv0366c	181.308	0.414717	0.119481	3.471	0.000518525	0.000988006	0.295378
Rv0367c	226.699	0.279247	0.15844	1.76248	0.0779882	0.0633758	0.141375
Rv0368c	82.2685	-0.126878	0.170545	-0.743953	0.456905	0.23413	-0.0567388
Rv0369c	133.458	-0.150969	0.155847	-0.968706	0.332692	0.188288	-0.0740294
Rv0370c	233.203	-0.21969	0.186394	-1.17863	0.238545	0.149199	-0.0919306
Rv0371c	38.6065	-0.204037	0.238029	-0.857193	0.391338	0.210183	-0.0644457
Rv0372c	40.1155	-0.0365451	0.257444	-0.141953	0.887117	0.363382	-0.0102391
Rv0373c	384.886	-0.290452	0.155308	-1.87017	0.0614605	0.0525188	-0.150786
Rv0374c	48.5475	-0.669758	0.283122	-2.36562	0.018	0.0195236	-0.246535
Rv0375c	88.6909	-0.348163	0.292302	-1.1911	0.233613	0.146821	-0.0900585
Rv0376c	279.142	-0.239048	0.178471	-1.33942	0.180434	0.121744	-0.105472
Rv0377	721.201	-0.171458	0.0606355	-2.82768	0.00468868	0.00639363	-0.147229
Rv0378	40.2182	0.264755	0.365696	0.723977	0.46908	0.238384	0.0496154
Rv0380c	844.548	0.453987	0.0853533	5.31892	1.04385e-07	4.50958e-07	0.396283
Rv0381c	2235.26	0.159437	0.0579968	2.74906	0.00597655	0.00785433	0.138355
Rv0383c	6449.84	-0.00176019	0.0833103	-0.0211281	0.983143	0.386925	-0.00130955
Rv0385	642.081	-0.0245528	0.0798201	-0.307602	0.758385	0.328893	-0.0186338
Rv0386	1872.32	-0.0278743	0.103753	-0.26866	0.788192	0.3375	-0.0184402
Rv0387c	185.152	-0.054247	0.123836	-0.438056	0.661346	0.300435	-0.0318277
Rv0390	595.448	-0.0108303	0.091957	-0.117776	0.906245	0.367552	-0.00767429
Rv0393	490.94	0.146511	0.0809577	1.80972	0.070339	0.0584707	0.112696
Rv0394c	603.911	0.00429716	0.0880842	0.0487847	0.961091	0.381944	0.00311274
Rv0395	61.3726	-0.478959	0.699063	-0.685144	0.493253	0.246331	-0.0409462
Rv0396	145.253	-0.328039	0.213285	-1.53803	0.124041	0.091426	-0.12429
Rv0397	162.713	-0.587028	0.510005	-1.15102	0.249723	0.1547	-0.0795835
Rv0397A	1246.78	-0.215734	0.054233	-3.97791	6.95238e-05	0.000169051	-0.191725
Rv0398c	978.875	-0.0501559	0.0863797	-0.580645	0.56148	0.270286	-0.0367855
Rv0401	152.128	0.101196	0.114576	0.883227	0.377114	0.206302	0.0632025
Rv0406c	584.112	0.126154	0.0736384	1.71315	0.0866843	0.069074	0.100609
Rv0412c	6794.87	-0.156194	0.069095	-2.26056	0.0237864	0.0242632	-0.128333
Rv0420c	1568.24	0.0131878	0.0428472	0.307786	0.758245	0.328893	0.0118119
Rv0421c	648.225	0.355433	0.089481	3.97216	7.12237e-05	0.000172111	0.282816
Rv0424c	2454.57	-0.0738905	0.0598997	-1.23357	0.217363	0.139349	-0.0625747
Rv0426c	1884.31	-0.250637	0.0588865	-4.25628	2.0786e-05	5.65405e-05	-0.219871
Rv0428c	526.591	0.27766	0.0687491	4.03874	5.37391e-05	0.000132951	0.234969
Rv0430	2220.52	-0.178958	0.0731934	-2.445	0.0144852	0.0162308	-0.144569
Rv0433	3488.89	-0.152661	0.0459389	-3.32312	0.000890153	0.00157661	-0.139272
Rv0434	1718.43	-0.0144051	0.0425083	-0.338878	0.734701	0.322844	-0.0129193
Rv0435c	2899.96	0.128117	0.0482763	2.65383	0.0079583	0.00996309	0.115554
Rv0439c	933.925	-0.141186	0.0871467	-1.62009	0.105212	0.0803818	-0.104721
Rv0441c	1487.25	0.117986	0.0617606	1.91037	0.0560855	0.0485378	0.0999172
Rv0443	1958.21	0.0561563	0.0555451	1.011	0.312015	0.180518	0.0483359
Rv0446c	1131.79	0.162604	0.0626913	2.59372	0.00949433	0.011436	0.138088
Rv0448c	450.08	0.233237	0.0919779	2.5358	0.0112191	0.0131083	0.1725
Rv0449c	1754.33	0.424273	0.0568696	7.46046	8.62223e-14	9.464e-13	0.39786
Rv0452	1170.4	0.281345	0.0728853	3.8601	0.00011334	0.000261325	0.233846
Rv0454	1727.62	-0.0914523	0.053399	-1.71262	0.0867822	0.0691167	-0.0801803
Rv0455c	3713.51	-0.381784	0.0650176	-5.872	4.30556e-09	2.39671e-08	-0.342723
Rv0457c	718.674	-0.191951	0.105859	-1.81327	0.0697908	0.058139	-0.129125
Rv0458	2854.99	-0.207715	0.0657145	-3.16088	0.00157296	0.0025645	-0.17519
Rv0459	1968.12	0.0298762	0.0816791	0.365775	0.714533	0.31639	0.0224528
Rv0460	2117.49	0.150134	0.0569765	2.63502	0.00841327	0.0103662	0.13073
Rv0461	2181.13	0.0512876	0.053984	0.950052	0.342086	0.192001	0.0444014
Rv0463	892.42	0.20363	0.0667359	3.05128	0.00227865	0.0034922	0.170771
Rv0464c	2231.39	0.121651	0.053993	2.2531	0.0242531	0.0246265	0.106954
Rv0465c	1012.64	0.0159914	0.148113	0.107967	0.914022	0.369392	0.00807619
Rv0466	2615.13	0.000643481	0.0485078	0.0132655	0.989416	0.388251	0.000564643
Rv0470A	258.579	-0.0906664	0.107066	-0.846828	0.397091	0.212249	-0.0591753
Rv0471c	595.754	-0.00606311	0.083939	-0.0722323	0.942417	0.376636	-0.00449533
Rv0472c	2938.91	-0.140039	0.040508	-3.45707	0.000546075	0.0010367	-0.130205
Rv0473	2127.69	-0.185506	0.0540668	-3.43106	0.000601224	0.00112766	-0.164312
Rv0474	2108.55	-0.046969	0.0762593	-0.615912	0.537953	0.26194	-0.0364146
Rv0476	2237.27	-0.11647	0.0994588	-1.17103	0.241586	0.150617	-0.0799353
Rv0477	3431.7	-0.103968	0.0756422	-1.37447	0.169295	0.115935	-0.0816563
Rv0479c	6548.11	-0.135459	0.0543296	-2.49328	0.012657	0.014463	-0.119142
Rv0480c	518.982	0.023185	0.0722092	0.321082	0.748149	0.326452	0.0183173
Rv0481c	1115.57	-0.141479	0.0677125	-2.08941	0.0366707	0.0345981	-0.116761
Rv0484c	1060.66	0.163553	0.0684477	2.38946	0.0168733	0.0185206	0.135006
Rv0485	6280.28	0.121315	0.0595924	2.03575	0.0417757	0.0382118	0.103893
Rv0487	2850.28	-0.138906	0.0602302	-2.30625	0.0210964	0.0221424	-0.118935
Rv0488	217.051	-0.186852	0.240006	-0.778533	0.436255	0.226653	-0.0581701
Rv0492A	113.845	0.0548906	0.142011	0.386523	0.69911	0.312272	0.0288238
Rv0492c	730.904	0.178253	0.0642257	2.77542	0.00551309	0.00733806	0.150636
Rv0493c	562.299	0.00179198	0.0677608	0.0264457	0.978902	0.38574	0.00144642
Rv0494	183.448	0.237517	0.11219	2.1171	0.0342514	0.0326316	0.156265
Rv0495c	1573.76	0.0460865	0.0654529	0.704117	0.48136	0.24202	0.0377725
Rv0496	2527.16	0.0610587	0.0531048	1.14978	0.250235	0.154895	0.0532029
Rv0497	1498.15	0.100387	0.0745016	1.34745	0.177836	0.120401	0.0792801
Rv0498	959.788	0.274285	0.0613208	4.47295	7.71467e-06	2.26021e-05	0.239551
Rv0499	686.285	0.381652	0.0928725	4.10941	3.96663e-05	0.000100529	0.304257
Rv0500A	3021.71	-0.129473	0.0751657	-1.7225	0.0849793	0.0679935	-0.102471
Rv0500B	3173.01	-0.0503901	0.094861	-0.531199	0.595281	0.280309	-0.0351944
Rv0502	17543.3	-0.147229	0.0504969	-2.91561	0.00354999	0.00506233	-0.131833
Rv0504c	1107.6	-0.0565654	0.0801649	-0.705613	0.480429	0.241942	-0.0429864
Rv0508	657.245	0.0988463	0.0808386	1.22276	0.22142	0.141063	0.0753553
Rv0513	1783.53	0.24132	0.0742394	3.25057	0.00115176	0.00196408	0.196762
Rv0514	488.674	0.483768	0.126336	3.82922	0.000128549	0.000292925	0.35902
Rv0515	5597.19	0.0953035	0.0667454	1.42787	0.15333	0.107409	0.0783459
Rv0516c	3725.98	-0.0962259	0.101853	-0.944757	0.344783	0.193236	-0.0648661
Rv0517	2496.16	0.095177	0.0474243	2.00692	0.0447578	0.0404411	0.0857449
Rv0518	1291.66	0.0575677	0.0577036	0.997644	0.318452	0.182963	0.0490781
Rv0519c	985.815	-0.00504989	0.0871702	-0.0579313	0.953803	0.380114	-0.00367698
Rv0520	291.023	-0.10747	0.103692	-1.03644	0.299999	0.176049	-0.0717862
Rv0521	87.5043	-0.0797199	0.237064	-0.336281	0.736659	0.323431	-0.0247123
Rv0523c	261.916	-0.113108	0.111992	-1.00996	0.312513	0.180672	-0.0719135
Rv0525	303.092	0.232566	0.121061	1.92107	0.0547229	0.0475964	0.1447
Rv0526	707.851	0.119867	0.079444	1.50882	0.131345	0.0956318	0.0924742
Rv0528	1021.45	0.157011	0.0625385	2.51063	0.0120516	0.0139244	0.133322
Rv0530	3758.32	0.165694	0.0526491	3.14715	0.00164871	0.00265468	0.147314
Rv0530A	1264.63	0.0178108	0.0739075	0.240987	0.809565	0.343818	0.0139434
Rv0531	907.322	0.0766866	0.0719648	1.06561	0.286599	0.170954	0.0611172
Rv0537c	3936.55	0.210452	0.0761546	2.76348	0.00571881	0.00756666	0.168567
Rv0538	1180.52	0.19321	0.0682052	2.83278	0.00461457	0.00630043	0.160552
Rv0539	1641.13	0.0853014	0.0677147	1.25972	0.207771	0.135139	0.0696313
Rv0540	138.741	0.235001	0.126808	1.8532	0.0638533	0.0541774	0.141306
Rv0541c	1335.77	0.368085	0.077232	4.76596	1.87957e-06	6.28659e-06	0.312628
Rv0543c	3082.23	0.154367	0.0651429	2.36967	0.0178039	0.0193378	0.129357
Rv0544c	582.387	0.134604	0.127315	1.05725	0.290397	0.172539	0.0782386
Rv0546c	618.259	0.111835	0.067674	1.65256	0.0984215	0.0764338	0.0917981
Rv0547c	735.876	0.225223	0.0648659	3.47212	0.000516359	0.000985083	0.191382
Rv0552	923.573	-0.0669052	0.0558886	-1.19712	0.231261	0.145739	-0.0576502
Rv0556	1567.1	0.100496	0.0572065	1.75672	0.0789662	0.064037	0.0867187
Rv0559c	3718.6	-0.0902139	0.0418467	-2.15582	0.0310976	0.0302416	-0.0830641
Rv0560c	736.42	0.119625	0.0645908	1.85205	0.0640183	0.0542582	0.0999108
Rv0561c	405.312	-0.118103	0.089179	-1.32433	0.185393	0.12423	-0.086158
Rv0565c	1278.08	-0.343686	0.0937187	-3.66721	0.00024521	0.000515083	-0.26554
Rv0566c	519.386	-0.313896	0.100409	-3.12617	0.00177102	0.0028081	-0.229616
Rv0567	2454.81	0.0615259	0.048986	1.25599	0.20912	0.13547	0.0545906
Rv0569	2401.14	-1.14017	0.127674	-8.93029	4.24886e-19	8.38279e-18	-1.11469
Rv0571c	2128.61	-0.965261	0.0903058	-10.6888	1.14844e-26	4.83781e-25	-0.949417
Rv0572c	1367.25	-1.97916	0.185848	-10.6494	1.75568e-26	7.20121e-25	-1.92209
Rv0574c	1665.41	-1.18046	0.151893	-7.77168	7.7449e-15	9.65716e-14	-1.14503
Rv0575c	237.537	-0.0152946	0.102257	-0.149571	0.881103	0.362831	-0.0102038
Rv0576	1375.4	0.0298993	0.0486805	0.614194	0.539087	0.26241	0.0263219
Rv0579	2766.44	-0.0116078	0.0483475	-0.240092	0.810259	0.343926	-0.0101981
Rv0580c	1975.22	-0.110679	0.0788065	-1.40444	0.160187	0.111064	-0.0855343
Rv0584	1371.52	0.121417	0.0889718	1.36466	0.172358	0.117402	0.0887413
Rv0585c	1631.38	-0.15462	0.0699333	-2.21097	0.027038	0.0269108	-0.126454
Rv0590A	266.297	-0.550436	0.145052	-3.79474	0.0001478	0.000330985	-0.40249
Rv0597c	3726.3	0.39334	0.0676936	5.81059	6.22525e-09	3.38079e-08	0.351891
Rv0600c	150.577	-0.133325	0.310264	-0.429716	0.667402	0.302481	-0.0299729
Rv0605	883.412	-0.0645456	0.0733113	-0.880431	0.378626	0.206631	-0.0509657
Rv0606	1106.58	-0.036672	0.054359	-0.674626	0.499913	0.248542	-0.0315878
Rv0607	276.157	0.136339	0.0917135	1.48658	0.137126	0.0987201	0.0983713
Rv0609A	684.212	-0.111597	0.0629397	-1.77308	0.0762157	0.0623254	-0.0938409
Rv0610c	1085.52	0.0193239	0.0641948	0.301019	0.7634	0.329975	0.0158806
Rv0611c	1337.86	-0.130838	0.0838369	-1.56062	0.118612	0.0882028	-0.0986876
Rv0612	258.362	0.275054	0.0981766	2.80162	0.00508466	0.00686751	0.199685
Rv0613c	1955.98	0.250599	0.0855191	2.93033	0.00338602	0.0048641	0.193237
Rv0614	158.775	0.0262533	0.222666	0.117904	0.906144	0.367552	0.00871958
Rv0615	244.946	0.11872	0.173426	0.684555	0.493625	0.246438	0.05213
Rv0616c	362.677	0.386571	0.0927975	4.16574	3.10341e-05	8.11588e-05	0.309468
Rv0621	748.463	-0.224381	0.0676647	-3.31607	0.000912941	0.00160584	-0.188136
Rv0622	595.145	-0.493396	0.0722045	-6.83332	8.29706e-12	7.02829e-11	-0.459716
Rv0625c	259.952	0.224559	0.131354	1.70957	0.087345	0.0694231	0.130768
Rv0628c	1143.19	-0.160712	0.102097	-1.57411	0.115463	0.0862722	-0.109637
Rv0633c	1518.19	-0.103804	0.0698164	-1.48682	0.137063	0.09872	-0.0841202
Rv0634A	2058.52	-0.126461	0.0561687	-2.25145	0.0243568	0.0246996	-0.110161
Rv0634c	2620.1	-0.0352583	0.0600667	-0.586987	0.557212	0.268965	-0.0295985
Rv0647c	1981.61	0.0872946	0.047553	1.83573	0.0663972	0.0559701	0.0784718
Rv0648	395.244	-0.233299	0.123723	-1.88565	0.0593426	0.0510093	-0.142856
Rv0650	58.4979	0.134337	0.499441	0.268974	0.78795	0.337489	0.0165347
Rv0653c	1779.45	0.178303	0.0692298	2.57552	0.0100089	0.0119499	0.146994
Rv0654	1797.11	-0.71097	0.107575	-6.60904	3.86828e-11	2.98477e-10	-0.673921
Rv0658c	1013.99	0.23398	0.0676097	3.46074	0.000538693	0.00102393	0.196665
Rv0666	74.0979	0.0636612	0.194387	0.327498	0.743291	0.325061	0.0246439
Rv0669c	2228.96	0.020839	0.0421592	0.494294	0.621099	0.288319	0.0187386
Rv0674	509.178	-0.193108	0.0839279	-2.30088	0.0213983	0.022414	-0.147674
Rv0678	18236.4	-0.430882	0.0712476	-6.04768	1.46949e-09	8.87748e-09	-0.389029
Rv0679c	14105	-0.474797	0.0760745	-6.24121	4.34185e-10	2.85542e-09	-0.433538
Rv0680c	2531.37	-0.432583	0.0720062	-6.00759	1.88302e-09	1.10752e-08	-0.389993
Rv0681	2316.56	0.0767366	0.0785648	0.976729	0.328703	0.187186	0.0590122
Rv0686	3384.32	-0.00447352	0.0506866	-0.0882585	0.929671	0.373265	-0.00389379
Rv0687	1079.88	-0.307715	0.0856931	-3.5909	0.000329543	0.000668936	-0.242791
Rv0688	2998.2	-0.147939	0.0691056	-2.14077	0.0322928	0.0310886	-0.12136
Rv0689c	89.2255	-0.141456	0.147657	-0.958005	0.33806	0.190564	-0.0727173
Rv0690c	2087.06	0.107542	0.0621244	1.73107	0.0834393	0.0670021	0.0907283
Rv0691A	122.592	-0.11052	0.149934	-0.73712	0.461049	0.235686	-0.0557016
Rv0691c	915.923	-0.203135	0.0977494	-2.07812	0.0376983	0.0353962	-0.143903
Rv0692	1510.34	-0.102793	0.0856591	-1.20002	0.23013	0.145277	-0.0763055
Rv0695	2551.37	-0.131831	0.0953974	-1.38192	0.166997	0.114563	-0.0929842
Rv0696	4960.02	-0.188056	0.0872642	-2.15502	0.0311603	0.0302789	-0.140953
Rv0697	1939.03	-0.137013	0.100201	-1.36739	0.171504	0.117139	-0.0940149
Rv0698	698.183	-0.119234	0.2844	-0.419248	0.675035	0.304789	-0.0298141
Rv0712	1904.86	-0.17321	0.0565351	-3.06375	0.00218578	0.00336643	-0.151565
Rv0713	5134.66	-0.111855	0.037544	-2.9793	0.00288905	0.00424407	-0.104888
Rv0725c	582.454	0.29311	0.0806877	3.63265	0.000280528	0.000581435	0.235617
Rv0726c	2023.98	0.0946519	0.043624	2.16972	0.0300281	0.0294542	0.0866099
Rv0730	2269.61	-0.0523089	0.0416473	-1.256	0.209117	0.13547	-0.0476665
Rv0731c	864.597	0.316548	0.0749388	4.22408	2.39918e-05	6.45219e-05	0.264323
Rv0737	203.963	-0.101599	0.168439	-0.603179	0.54639	0.264972	-0.0458015
Rv0738	347.553	-0.0839124	0.150378	-0.55801	0.576838	0.274593	-0.0420146
Rv0739	350.575	-0.234676	0.11336	-2.07018	0.0384352	0.0358605	-0.153136
Rv0740	2714.67	-0.161182	0.0450913	-3.57458	0.000350796	0.000701877	-0.147611
Rv0741	2326.74	0.0500476	0.0544772	0.918689	0.358258	0.198999	0.04322
Rv0743c	799.708	0.0250065	0.0706708	0.353845	0.723455	0.319433	0.0199152
Rv0744c	640.856	0.185969	0.17961	1.03541	0.300479	0.176143	0.0800274
Rv0745	38.2757	0.32212	0.22604	1.42506	0.154141	0.107639	0.113539
Rv0749A	326.184	0.0349028	0.12199	0.286112	0.774792	0.333343	0.0206822
Rv0750	1573.22	-0.107749	0.0431181	-2.49892	0.0124573	0.0143189	-0.0989789
Rv0755A	1655.62	-0.247949	0.082826	-2.99361	0.00275696	0.00409637	-0.193795
Rv0756c	1737.09	0.0664537	0.0557248	1.19253	0.233052	0.146646	0.0572981
Rv0759c	2573.29	-0.179183	0.0520634	-3.44163	0.000578216	0.00109107	-0.159926
Rv0760c	2874.9	-0.128531	0.0505667	-2.54182	0.0110278	0.0129333	-0.114825
Rv0762c	976.137	-0.57459	0.119734	-4.79888	1.59554e-06	5.45364e-06	-0.489709
Rv0763c	229.795	-0.794868	0.147309	-5.39594	6.81675e-08	3.09761e-07	-0.728184
Rv0765c	1013.63	-0.996524	0.117877	-8.45395	2.81621e-17	4.57233e-16	-0.970165
Rv0767c	641.205	-0.571415	0.129164	-4.42394	9.69179e-06	2.79222e-05	-0.466358
Rv0769	762.828	-0.758209	0.107932	-7.02486	2.14279e-12	1.97622e-11	-0.725292
Rv0770	430.244	-0.723419	0.115324	-6.27291	3.54371e-10	2.39106e-09	-0.680811
Rv0771	286.877	-0.556221	0.118274	-4.70281	2.56606e-06	8.29781e-06	-0.46807
Rv0774c	1202.99	-0.00175203	0.0632421	-0.0277036	0.977899	0.38574	-0.00144514
Rv0775	846.07	-0.0675028	0.0635664	-1.06193	0.28827	0.171605	-0.0560697
Rv0776c	254.419	-0.0205401	0.0911175	-0.225424	0.821649	0.346871	-0.0146298
Rv0779c	229.608	0.215898	0.108331	1.99295	0.0462672	0.0415161	0.144207
Rv0784	356.828	0.116158	0.103636	1.12083	0.262361	0.160425	0.0777402
Rv0785	1562.59	0.010843	0.0649189	0.167024	0.867352	0.359638	0.00887537
Rv0786c	537.81	0.00418626	0.0773044	0.0541529	0.956813	0.38073	0.00321777
Rv0787	1216.15	0.159751	0.0833524	1.91657	0.0552923	0.0480381	0.121588
Rv0787A	911.83	0.221746	0.0728186	3.04518	0.00232544	0.00353793	0.181172
Rv0789c	1413.75	-0.643696	0.138531	-4.64658	3.37487e-06	1.07132e-05	-0.546276
Rv0790c	1894.62	-1.92674	0.349662	-5.51029	3.5825e-08	1.68695e-07	-1.73501
Rv0791c	2234.94	-1.96391	0.323426	-6.07219	1.26176e-09	7.77321e-09	-1.79815
Rv0792c	2653.67	-2.09586	0.299856	-6.98956	2.75749e-12	2.49878e-11	-1.94475
Rv0793	161.678	-1.72379	0.217134	-7.93883	2.04091e-15	2.74227e-14	-1.65502
Rv0794c	704.522	-0.230408	0.0673546	-3.42082	0.000624327	0.0011626	-0.193737
Rv0795	1506.47	-0.278269	0.323879	-0.859176	0.390244	0.209809	-0.0612725
Rv0796	7017.61	-0.0589735	0.0827053	-0.713056	0.475811	0.240842	-0.0442032
Rv0797	1465.09	0.0933262	0.160856	0.580184	0.561791	0.270338	0.0439437
Rv0799c	2073.49	-0.00976688	0.0664787	-0.146917	0.883197	0.363111	-0.00793439
Rv0801	538.92	-0.182495	0.0903672	-2.01948	0.043437	0.0394628	-0.134181
Rv0802c	876.75	0.0247007	0.0696063	0.354862	0.722693	0.319187	0.0197773
Rv0804	507.916	0.232399	0.0767987	3.02608	0.00247749	0.00373678	0.18658
Rv0805	12891.7	-0.183008	0.0626938	-2.91908	0.00351065	0.00501081	-0.155908
Rv0807	270.162	-0.0943466	0.117741	-0.801306	0.422954	0.222336	-0.0577324
Rv0810c	6326.13	-0.12044	0.0945488	-1.27384	0.202719	0.132982	-0.0851778
Rv0811c	2175.73	0.124131	0.0603253	2.0577	0.0396189	0.0366694	0.10598
Rv0812	1291.13	0.18554	0.0592582	3.13104	0.00174188	0.0027817	0.160656
Rv0813c	1711.49	0.0892451	0.109571	0.814498	0.41536	0.219455	0.0573575
Rv0817c	404.128	-0.118097	0.173499	-0.680676	0.496077	0.247187	-0.0518287
Rv0818	3690.07	0.11001	0.0678274	1.62191	0.104822	0.0802451	0.0901955
Rv0822c	7235.28	-0.230944	0.0614301	-3.75945	0.000170285	0.000373818	-0.199559
Rv0823c	20820.4	-0.450297	0.0788849	-5.70828	1.14124e-08	5.90956e-08	-0.401229
Rv0825c	1099.02	-0.344767	0.0788808	-4.37073	1.23831e-05	3.49649e-05	-0.28677
Rv0826	633.368	-0.516614	0.0874401	-5.9082	3.45864e-09	1.96742e-08	-0.46854
Rv0828c	48.5986	-0.297111	0.26889	-1.10496	0.269178	0.163708	-0.0835546
Rv0829	561.11	0.0124863	0.109389	0.114146	0.909122	0.368144	0.00798098
Rv0830	2826.53	0.26051	0.054881	4.74682	2.06644e-06	6.85281e-06	0.232773
Rv0831c	10850.7	-0.0229507	0.039439	-0.581929	0.560614	0.270105	-0.0208313
Rv0836c	481.775	-0.315559	0.165109	-1.91122	0.0559769	0.0484938	-0.156752
Rv0837c	848.339	-0.542678	0.110441	-4.91375	8.93504e-07	3.26911e-06	-0.464942
Rv0839	1629.35	0.308865	0.0480297	6.4307	1.27018e-10	9.1232e-10	0.285913
Rv0841	262.201	0.0313517	0.122298	0.256356	0.797676	0.340532	0.0185396
Rv0842	3093.97	-0.247575	0.141811	-1.74582	0.080843	0.065355	-0.136538
Rv0843	572.614	-0.0260041	0.101642	-0.255839	0.798075	0.340609	-0.0174192
Rv0845	1048.25	-0.0433377	0.0749171	-0.578476	0.562943	0.270642	-0.0338255
Rv0846c	1933.46	-0.168644	0.111916	-1.50688	0.13184	0.095889	-0.108627
Rv0849	1194.59	0.574373	0.172971	3.32063	0.000898143	0.00158536	0.367717
Rv0850	423.745	0.203659	0.147991	1.37616	0.168773	0.115679	0.106313
Rv0851c	1008.62	0.102276	0.0975915	1.048	0.29464	0.174118	0.0707954
Rv0854	1082.01	-0.497281	0.0480001	-10.36	3.76976e-25	1.3057e-23	-0.48421
Rv0856	1738.55	-0.205509	0.0520062	-3.95162	7.76247e-05	0.000185422	-0.184034
Rv0857	2071.8	-0.046779	0.0573164	-0.816153	0.414413	0.219207	-0.0398548
Rv0862c	957.42	0.0688727	0.0564194	1.22073	0.222189	0.141352	0.059228
Rv0863	2502.62	0.111406	0.0731724	1.52251	0.127882	0.0935584	0.0888103
Rv0870c	2487.39	-0.26317	0.0489309	-5.3784	7.51511e-08	3.36589e-07	-0.240559
Rv0874c	1098.99	-0.0762348	0.0679939	-1.1212	0.262202	0.160425	-0.0620281
Rv0875c	1047.95	-0.07606	0.0730855	-1.0407	0.298016	0.17527	-0.0602504
Rv0876c	3763.82	-0.257323	0.0531322	-4.84307	1.27847e-06	4.49809e-06	-0.231338
Rv0877	3488.04	-0.14952	0.0793015	-1.88547	0.0593667	0.0510093	-0.116152
Rv0879c	526.59	0.0490039	0.092783	0.528156	0.597391	0.280963	0.034639
Rv0880	286.183	0.0481175	0.102889	0.467663	0.640025	0.294527	0.032041
Rv0881	532.13	0.0494491	0.0645157	0.766466	0.443399	0.2296	0.0407391
Rv0882	316.66	0.0418291	0.0953573	0.438657	0.66091	0.300325	0.0291081
Rv0883c	2276.62	-0.0869172	0.0506036	-1.71761	0.085868	0.0685287	-0.0770937
Rv0885	5651.14	-0.285662	0.0474018	-6.02639	1.67664e-09	9.93636e-09	-0.263629
Rv0887c	222.693	-0.0819744	0.115008	-0.71277	0.475988	0.240842	-0.0509167
Rv0888	6352.93	-0.249538	0.0449158	-5.55568	2.76531e-08	1.3344e-07	-0.230776
Rv0890c	3521.19	0.279489	0.0427041	6.5448	5.95769e-11	4.48592e-10	0.261523
Rv0891c	1403.88	0.0756469	0.122005	0.620031	0.535237	0.261107	0.0449825
Rv0892	2683.48	0.257075	0.0587588	4.3751	1.21377e-05	3.43969e-05	0.225964
Rv0893c	660.344	0.204471	0.0793271	2.57757	0.00994986	0.0118928	0.160809
Rv0894	767.137	-0.0613917	0.1447	-0.424269	0.67137	0.303925	-0.031734
Rv0895	254.255	0.0498329	0.132448	0.376246	0.706734	0.314186	0.0277276
Rv0897c	2034.9	0.0878812	0.0496557	1.76981	0.0767588	0.0627037	0.0782927
Rv0898c	1067.11	0.04692	0.0925188	0.50714	0.612056	0.285278	0.0332103
Rv0900	394.241	0.0398623	0.0907268	0.439366	0.660396	0.300325	0.0284908
Rv0901	797.744	0.116732	0.0786379	1.48442	0.137698	0.0990199	0.0904045
Rv0906	1401.06	0.0582548	0.0572927	1.01679	0.309252	0.179617	0.0497667
Rv0907	1452.77	-0.0984688	0.0687661	-1.43194	0.152161	0.10683	-0.080153
Rv0909	1230.49	-0.153356	0.093013	-1.64876	0.099197	0.0769595	-0.11023
Rv0910	3128.14	-0.118648	0.0488989	-2.4264	0.0152494	0.016941	-0.106618
Rv0911	1427.37	0.209281	0.0629903	3.32244	0.000892337	0.0015769	0.178832
Rv0912	557.963	0.141383	0.0777134	1.81929	0.0688667	0.0576465	0.110612
Rv0913c	3209.7	-0.138484	0.0760246	-1.82157	0.0685205	0.0573875	-0.109288
Rv0914c	1440.92	-0.0807792	0.052821	-1.5293	0.12619	0.0926006	-0.0708357
Rv0918	292.003	-0.172358	0.113032	-1.52486	0.127295	0.0932355	-0.110377
Rv0919	2257.96	0.082376	0.0780261	1.05575	0.291083	0.172769	0.063599
Rv0920c	1227.02	0.116534	0.0738974	1.57697	0.114803	0.0859441	0.0926291
Rv0921	771.061	-0.603993	0.383526	-1.57485	0.115292	0.0862274	-0.126122
Rv0922	6313.15	0.162551	0.0751081	2.16423	0.0304464	0.0297812	0.129554
Rv0923c	2166.45	0.209335	0.0789203	2.65248	0.00799025	0.00999507	0.165195
Rv0925c	2263.75	-0.174993	0.0524504	-3.33634	0.000848888	0.00152256	-0.155865
Rv0926c	1044.27	-0.164634	0.0706335	-2.33081	0.0197632	0.021055	-0.134406
Rv0927c	411.356	-0.200493	0.106868	-1.87607	0.0606453	0.0519646	-0.13441
Rv0939	4267.96	0.0729962	0.0524357	1.39211	0.16389	0.112878	0.0639973
Rv0940c	1913.77	-0.177604	0.0719126	-2.46972	0.0135217	0.0153521	-0.144398
Rv0941c	2088.4	-0.439412	0.0805495	-5.45517	4.89246e-08	2.26277e-07	-0.386292
Rv0942	848.913	-0.439811	0.0714996	-6.15124	7.68803e-10	4.87106e-09	-0.398845
Rv0943c	236.669	-0.352512	0.307868	-1.14501	0.252206	0.155929	-0.0853767
Rv0944	149.598	-0.0808531	0.207143	-0.390326	0.696296	0.311679	-0.0292477
Rv0945	1065.33	0.0619932	0.0600606	1.03218	0.301989	0.176752	0.0523188
Rv0947c	463.346	0.394724	0.0883611	4.46717	7.92595e-06	2.31775e-05	0.3248
Rv0948c	3174.83	0.0553518	0.0532721	1.03904	0.298787	0.175536	0.0481216
Rv0950c	5969.24	-0.346873	0.0894011	-3.87997	0.000104471	0.000242671	-0.274582
Rv0953c	327.241	-0.216937	0.112528	-1.92786	0.0538728	0.0469619	-0.141327
Rv0954	7878.83	0.0885288	0.084543	1.04715	0.295032	0.174118	0.0659691
Rv0955	3067.92	0.166216	0.089887	1.84917	0.0644336	0.0544326	0.122049
Rv0958	1371.42	0.0722221	0.0615661	1.17308	0.240763	0.150224	0.0606452
Rv0959	1571.64	0.0242589	0.0636216	0.3813	0.702981	0.313467	0.0199998
Rv0961	1381.55	-0.20768	0.0919481	-2.25867	0.0239038	0.0243511	-0.15238
Rv0963c	230.173	-0.231356	0.229942	-1.00615	0.314343	0.181461	-0.076779
Rv0964c	206.721	0.175312	0.176355	0.994083	0.320182	0.183681	0.0766423
Rv0965c	805.005	0.0945975	0.0647734	1.46044	0.14417	0.102326	0.0785441
Rv0966c	1665.15	-0.0267829	0.0711277	-0.376547	0.70651	0.314186	-0.0212836
Rv0968	3633.3	-1.17145	0.134588	-8.70401	3.2036e-18	5.94433e-17	-1.14395
Rv0970	1985.45	-0.252902	0.116753	-2.16614	0.0303006	0.0296654	-0.162926
Rv0976c	445.106	0.149264	0.0883999	1.68851	0.0913124	0.0719999	0.110112
Rv0979c	50.8443	-0.392266	0.224826	-1.74475	0.0810283	0.065441	-0.145694
Rv0986	842.642	-0.364242	0.0849076	-4.28986	1.78783e-05	4.90667e-05	-0.298077
Rv0987	3751.62	-0.330693	0.0724318	-4.56558	4.98117e-06	1.5253e-05	-0.281107
Rv0988	2552.71	-0.271211	0.0660953	-4.10333	4.07242e-05	0.000103042	-0.231814
Rv0990c	1310.71	-0.847559	0.126884	-6.67978	2.39294e-11	1.8837e-10	-0.807831
Rv0991c	3372.08	-1.20669	0.115979	-10.4044	2.36728e-25	8.3857e-24	-1.18739
Rv0992c	424.927	0.121626	0.11985	1.01482	0.310192	0.179797	0.0738163
Rv0996	4424.95	-0.618568	0.0671326	-9.21413	3.13824e-20	6.88923e-19	-0.602312
Rv0997	1624.85	0.226245	0.073982	3.05811	0.00222736	0.0034237	0.183971
Rv0998	1977.53	0.155575	0.0753017	2.06602	0.038827	0.0360864	0.123688
Rv0999	1137.75	0.268013	0.0767428	3.49236	0.000478772	0.000925842	0.217614
Rv1000c	628.059	0.330534	0.0737846	4.47971	7.47436e-06	2.19393e-05	0.279275
Rv1002c	1872.79	0.031119	0.0507058	0.613717	0.539403	0.262482	0.0271841
Rv1003	325.841	0.0501892	0.168145	0.298488	0.765331	0.330455	0.022537
Rv1004c	455.023	0.019572	0.106217	0.184264	0.853807	0.355535	0.0127536
Rv1006	13580.6	0.195184	0.0470899	4.14493	3.39919e-05	8.7989e-05	0.177941
Rv1012	129.785	-0.0982022	0.131193	-0.748532	0.454139	0.233224	-0.0553676
Rv1019	2030.9	-0.165041	0.0503151	-3.28015	0.00103751	0.00178776	-0.148148
Rv1021	2025.86	0.153859	0.046277	3.32474	0.000885019	0.0015693	0.140196
Rv1024	571.465	0.0996071	0.0738793	1.34824	0.177581	0.120315	0.0789182
Rv1025	694.956	0.209598	0.0663735	3.15785	0.00158937	0.00258584	0.176286
Rv1026	726.62	0.401604	0.0756216	5.31071	1.09198e-07	4.65026e-07	0.350603
Rv1035c	231.99	-0.0177332	0.121735	-0.14567	0.884182	0.363111	-0.0105168
Rv1036c	128.579	-0.169963	0.216668	-0.78444	0.432782	0.225601	-0.0593621
Rv1041c	1464.34	-0.0465952	0.105501	-0.441657	0.658737	0.299775	-0.0305416
Rv1042c	518.082	-0.17578	0.0876332	-2.00586	0.044871	0.0404965	-0.131066
Rv1043c	2132.7	0.315471	0.0711723	4.4325	9.31486e-06	2.69359e-05	0.267825
Rv1044	327.262	-0.193473	0.118965	-1.6263	0.103885	0.0797631	-0.120234
Rv1045	1302.42	-0.113397	0.100484	-1.12851	0.259106	0.158871	-0.0773048
Rv1046c	3869.62	-0.26324	0.106908	-2.46231	0.0138047	0.0156255	-0.180707
Rv1047	15954.1	-0.239112	0.0903438	-2.64669	0.00812842	0.010103	-0.178839
Rv1048c	938.1	-0.611745	0.127938	-4.78156	1.73936e-06	5.90636e-06	-0.523834
Rv1049	238.293	-0.174458	0.135707	-1.28555	0.198602	0.131164	-0.0972682
Rv1050	158.039	-0.0367621	0.235617	-0.156025	0.876013	0.36169	-0.0114415
Rv1051c	82.8374	-0.346434	0.416606	-0.831563	0.405656	0.216086	-0.0560909
Rv1052	549.263	-0.230882	0.0978135	-2.36043	0.0182537	0.0197301	-0.165
Rv1053c	391.042	-0.154487	0.107424	-1.43811	0.150403	0.105945	-0.101894
Rv1054	1116.04	0.109999	0.0642816	1.7112	0.0870433	0.0692893	0.0918452
Rv1055	333.411	0.0237901	0.0847965	0.280555	0.779052	0.334598	0.0175656
Rv1056	868.101	0.0501885	0.0599813	0.836736	0.402741	0.21468	0.0422655
Rv1057	396.262	0.110304	0.166837	0.66115	0.508516	0.251456	0.0502638
Rv1059	1402.86	-0.0929569	0.0684003	-1.35901	0.174142	0.11837	-0.0757272
Rv1060	1835.99	0.0796497	0.0592399	1.34453	0.178778	0.120837	0.0677557
Rv1061	962.464	0.0227423	0.0661323	0.343891	0.730928	0.321458	0.0185219
Rv1062	413.641	0.141653	0.0940476	1.50618	0.13202	0.0959752	0.100929
Rv1063c	962.023	0.0941577	0.0678598	1.38753	0.16528	0.11355	0.0769404
Rv1065	4853.94	-0.182378	0.0835984	-2.1816	0.0291394	0.0286908	-0.139353
Rv1066	360.194	-0.25094	0.154379	-1.62548	0.10406	0.0798186	-0.128402
Rv1069c	2572.77	0.033253	0.0512776	0.64849	0.516668	0.25476	0.0289947
Rv1072	60994.4	-0.405175	0.0776081	-5.22078	1.78174e-07	7.3081e-07	-0.351798
Rv1073	13757.2	-0.215515	0.0758549	-2.84115	0.00449509	0.00619468	-0.173106
Rv1075c	321.11	0.0449776	0.092136	0.488165	0.625433	0.289651	0.0319004
Rv1081c	371.214	-0.0523261	0.10276	-0.509205	0.610609	0.28503	-0.0348834
Rv1083	876.681	0.0524452	0.0802053	0.653888	0.513184	0.25332	0.0398253
Rv1084	1239.55	0.0539002	0.0619992	0.869369	0.384645	0.208892	0.0449906
Rv1085c	1063.16	0.0979607	0.0680281	1.44	0.149867	0.105743	0.0800393
Rv1086	2165.72	-0.0799649	0.0587757	-1.36051	0.173669	0.1181	-0.0681811
Rv1087A	99.4473	0.335142	0.202042	1.65878	0.0971605	0.075621	0.135791
Rv1096	3132.36	0.154806	0.0450483	3.43645	0.0005894	0.00110949	0.141728
Rv1097c	3777.34	0.241321	0.0508446	4.74625	2.07224e-06	6.85745e-06	0.218219
Rv1100	1464.69	0.0196085	0.0644373	0.304304	0.760896	0.329707	0.0160963
Rv1101c	4938.42	-0.165677	0.0657869	-2.51838	0.0117895	0.0136723	-0.138653
Rv1104	1118.77	0.0174532	0.0566378	0.308154	0.757965	0.328893	0.0148413
Rv1105	234.467	0.0970997	0.138321	0.701986	0.482688	0.242375	0.0524016
Rv1106c	2144.09	0.0232778	0.0405356	0.574257	0.565794	0.27167	0.0210574
Rv1109c	6001.41	-0.181629	0.0454176	-3.99909	6.35874e-05	0.000155587	-0.166404
Rv1111c	2204.02	0.051111	0.0591205	0.864521	0.387302	0.209809	0.0432247
Rv1112	376.774	-0.141117	0.135545	-1.04111	0.297824	0.175235	-0.0780959
Rv1115	351.927	0.111393	0.104481	1.06616	0.286351	0.170937	0.0741059
Rv1116	359.312	0.116997	0.100336	1.16605	0.243594	0.151725	0.0798846
Rv1116A	508.574	-0.0978938	0.0763729	-1.28179	0.199918	0.131707	-0.0764884
Rv1117	2057.34	-0.16831	0.0644097	-2.61311	0.0089722	0.0109253	-0.141876
Rv1118c	1576.99	-0.0526785	0.0479838	-1.09784	0.272274	0.164998	-0.0468114
Rv1119c	192.864	-0.146586	0.124258	-1.17969	0.238123	0.149004	-0.087052
Rv1120c	130.688	0.113927	0.233233	0.488471	0.625216	0.289651	0.0361507
Rv1125	711.38	0.13323	0.0636764	2.09229	0.0364124	0.034396	0.112061
Rv1126c	856.103	-0.00736716	0.0541983	-0.13593	0.891877	0.363902	-0.00632428
Rv1128c	494.203	-0.118542	0.119731	-0.990067	0.322141	0.184257	-0.0719544
Rv1129c	223.393	0.0383276	0.275601	0.139069	0.889395	0.363651	0.00988767
Rv1132	4750.46	0.308118	0.0653046	4.71817	2.37974e-06	7.7923e-06	0.267507
Rv1134	45.9253	0.239978	0.218311	1.09925	0.27166	0.16469	0.0848759
Rv1136	101.859	0.130003	0.166742	0.779664	0.435589	0.226458	0.0594828
Rv1137c	198.773	0.103847	0.158844	0.653768	0.513262	0.25332	0.0495623
Rv1138c	656.903	0.00624188	0.0589839	0.105823	0.915722	0.369856	0.00524969
Rv1139c	611.398	-0.0403607	0.0727304	-0.554936	0.578938	0.275359	-0.0318548
Rv1140	2667.76	0.0134699	0.0590923	0.227946	0.819688	0.346325	0.0113277
Rv1144	3035.88	0.62781	0.0772903	8.12276	4.55716e-16	6.96366e-15	0.606042
Rv1147	963.841	0.40432	0.0702882	5.75232	8.80278e-09	4.65094e-08	0.360614
Rv1148c	2839.61	-0.113679	0.127602	-0.890891	0.372988	0.204845	-0.0656896
Rv1149	4178.4	-0.0431519	0.0499545	-0.863825	0.387684	0.209809	-0.0379267
Rv1150	1462.26	-0.043	0.10616	-0.405049	0.685442	0.308415	-0.0280657
Rv1151c	530.276	-0.140889	0.072062	-1.95511	0.0505704	0.0446828	-0.113643
Rv1152	604.786	-0.0239876	0.130737	-0.183479	0.854422	0.355697	-0.0134674
Rv1154c	575.374	-0.127202	0.0750394	-1.69514	0.0900491	0.0712815	-0.100697
Rv1155	2365.83	-0.17495	0.0671199	-2.60652	0.00914665	0.0111117	-0.145679
Rv1156	8660.01	0.112328	0.0456418	2.46109	0.0138516	0.0156279	0.102221
Rv1157c	3888.91	0.210488	0.0650819	3.2342	0.00121983	0.0020621	0.178156
Rv1158c	859.161	0.285537	0.091004	3.13763	0.0017032	0.0027389	0.216758
Rv1159A	1582.92	-0.0686773	0.0761432	-0.901949	0.367084	0.202132	-0.0534466
Rv1167c	1809.61	-0.320804	0.0903628	-3.55017	0.00038498	0.000760509	-0.248779
Rv1171	4376.16	-0.204171	0.0598271	-3.41269	0.00064326	0.00119358	-0.176836
Rv1176c	393.879	-0.149995	0.10644	-1.4092	0.158777	0.110283	-0.0994156
Rv1178	5150.1	0.00950171	0.0813364	0.11682	0.907003	0.367699	0.007147
Rv1179c	6750.44	0.0526321	0.0585415	0.899055	0.368623	0.20286	0.0446461
Rv1184c	21739.4	-0.103552	0.0614621	-1.68481	0.0920257	0.0724415	-0.0875807
Rv1186c	2303.94	-0.0358148	0.0486704	-0.735865	0.461813	0.235962	-0.0315787
Rv1188	317.205	-0.00130654	0.0915799	-0.0142667	0.988617	0.388133	-0.000927706
Rv1190	226.25	-0.0266577	0.106497	-0.250314	0.802345	0.34187	-0.0173467
Rv1191	631.838	-0.00887799	0.0635472	-0.139707	0.888892	0.363547	-0.00731366
Rv1192	4519.01	-0.0326604	0.078668	-0.415168	0.678019	0.305693	-0.0249574
Rv1194c	6257.95	-0.273453	0.0445487	-6.1383	8.34084e-10	5.24205e-09	-0.254146
Rv1199c	16252.8	-0.234351	0.0903317	-2.59434	0.00947738	0.0114332	-0.175005
Rv1200	4214.96	-0.0795281	0.0633619	-1.25514	0.209427	0.135613	-0.0662937
Rv1203c	214.623	0.274839	0.103223	2.66258	0.00775446	0.00975492	0.193818
Rv1204c	972.959	0.156476	0.0597169	2.6203	0.0087853	0.0107481	0.134654
Rv1205	1161.1	-0.407791	0.0966747	-4.21818	2.46279e-05	6.5955e-05	-0.325946
Rv1209	729.201	0.169678	0.114025	1.48809	0.136728	0.0986587	0.107925
Rv1211	6039.55	-0.0840105	0.036866	-2.27881	0.0226784	0.0233578	-0.0787164
Rv1215c	3517.38	0.168134	0.0861893	1.95075	0.0510866	0.0449605	0.126169
Rv1216c	9059.25	0.291835	0.0850521	3.43125	0.000600805	0.00112766	0.229303
Rv1217c	10834	0.5094	0.0701646	7.26008	3.8686e-13	3.9932e-12	0.480212
Rv1218c	13141.2	0.283688	0.0753536	3.76476	0.000166708	0.000366482	0.233226
Rv1219c	7894.95	0.10985	0.0917725	1.19698	0.231314	0.145739	0.0788069
Rv1220c	621.31	0.302351	0.0789861	3.82789	0.000129244	0.000294078	0.246086
Rv1225c	1890.21	0.178102	0.0549288	3.24242	0.00118518	0.00201226	0.157036
Rv1226c	451.156	0.0147177	0.117904	0.124828	0.90066	0.366306	0.00893416
Rv1227c	182.976	0.197236	0.134295	1.46867	0.141921	0.101191	0.111702
Rv1230c	3433.59	-0.0547578	0.0548247	-0.998781	0.317901	0.18277	-0.0472695
Rv1231c	917.642	-0.00503197	0.0611208	-0.0823283	0.934386	0.374675	-0.00419156
Rv1232c	2456.35	0.342186	0.0770012	4.44391	8.83393e-06	2.55926e-05	0.286669
Rv1233c	3321.45	0.35124	0.0580922	6.04625	1.48255e-09	8.92182e-09	0.318635
Rv1234	2340.76	-0.0339934	0.0716063	-0.474727	0.634982	0.292465	-0.0269664
Rv1245c	2371.44	0.0859709	0.0452465	1.90006	0.0574258	0.0495327	0.078013
Rv1248c	15302.3	-0.105331	0.0471887	-2.23213	0.0256064	0.0256827	-0.0951543
Rv1249c	1977.02	0.0343961	0.0715233	0.480908	0.630582	0.291127	0.0272987
Rv1250	1310.54	-0.101938	0.0626538	-1.62701	0.103735	0.0796933	-0.0856782
Rv1251c	2070.54	0.201939	0.0561395	3.59709	0.000321796	0.000657354	0.177683
Rv1254	2226.62	-0.0138487	0.0535459	-0.258633	0.795918	0.340154	-0.0119259
Rv1255c	797.458	0.0436585	0.0885052	0.493288	0.621809	0.28853	0.0316146
Rv1257c	2630.07	0.0929016	0.0513444	1.80938	0.0703919	0.0584835	0.082238
Rv1258c	767.252	-0.150019	0.0675579	-2.2206	0.026378	0.0262874	-0.124098
Rv1260	2853.7	0.105146	0.0376305	2.79417	0.00520328	0.00699137	0.0985184
Rv1261c	1934.96	0.0139146	0.0473451	0.293899	0.768835	0.331488	0.0122732
Rv1262c	719.918	0.00925085	0.0815158	0.113485	0.909646	0.36826	0.00695144
Rv1264	3955.88	0.164442	0.0688482	2.38847	0.0169187	0.0185573	0.135485
Rv1265	3347.97	0.111898	0.0565749	1.97788	0.0479421	0.0426507	0.0970577
Rv1268c	307.59	-0.00428556	0.119056	-0.0359962	0.971285	0.384232	-0.00258287
Rv1269c	1048.33	-0.15354	0.070685	-2.17217	0.0298427	0.0293092	-0.125054
Rv1271c	1771.95	0.12903	0.0586475	2.20009	0.0278006	0.0275291	0.111144
Rv1272c	2805.34	0.118967	0.0431915	2.75442	0.00587972	0.00774667	0.109382
Rv1273c	1139.1	-0.0548316	0.0621316	-0.882508	0.377502	0.206379	-0.0457473
Rv1276c	309.506	0.335381	0.102778	3.26316	0.00110179	0.00188919	0.245384
Rv1277	1356.17	-0.0493851	0.0507071	-0.973929	0.330092	0.187513	-0.0433441
Rv1278	1505.83	0.0413483	0.0529475	0.78093	0.434843	0.226373	0.0358702
Rv1279	2773.12	0.0324828	0.0413148	0.786228	0.431734	0.225432	0.0294039
Rv1287	1447.91	-0.821481	0.145251	-5.6556	1.55306e-08	7.85923e-08	-0.762194
Rv1288	1074.94	-0.652313	0.0919143	-7.09697	1.27525e-12	1.19737e-11	-0.622018
Rv1289	1146.01	-0.0494012	0.0931597	-0.530286	0.595914	0.280359	-0.0348448
Rv1290c	912.554	-0.0568625	0.0639953	-0.888542	0.374249	0.205321	-0.047031
Rv1291c	81.6941	-0.134931	0.167945	-0.803423	0.42173	0.222068	-0.061363
Rv1301	3176.38	0.165979	0.0644485	2.57538	0.010013	0.0119499	0.139832
Rv1303	4574.36	-0.701618	0.0966957	-7.25594	3.9889e-13	4.09028e-12	-0.672306
Rv1312	2378.43	-0.175424	0.0587163	-2.98766	0.00281121	0.00416109	-0.152055
Rv1313c	6929.28	0.158302	0.0393334	4.02462	5.70666e-05	0.000140104	0.147919
Rv1314c	686.597	-0.0898645	0.0676825	-1.32774	0.184266	0.123794	-0.073436
Rv1318c	1553.61	-0.00977465	0.0451734	-0.216381	0.828691	0.348678	-0.00868322
Rv1319c	2194.32	-0.115326	0.0491717	-2.34537	0.019008	0.0203899	-0.103467
Rv1320c	4985.11	-0.110208	0.0380728	-2.89466	0.00379572	0.00535397	-0.103146
Rv1321	2530.05	0.230609	0.0427933	5.3889	7.08888e-08	3.2119e-07	0.214266
Rv1322	2243.38	0.45236	0.0816365	5.54114	3.00501e-08	1.44114e-07	0.399787
Rv1322A	25859	0.153072	0.0604453	2.53242	0.011328	0.0132256	0.131209
Rv1324	7690.62	0.370544	0.0605746	6.11714	9.52685e-10	5.91587e-09	0.335977
Rv1331	2717.04	-0.0186663	0.110897	-0.168321	0.866331	0.359311	-0.0118249
Rv1332	6113.18	-0.113937	0.0531149	-2.14509	0.0319453	0.0308685	-0.100449
Rv1333	1807.37	0.231994	0.0730627	3.17527	0.00149695	0.00245772	0.189798
Rv1337	4948.99	0.178923	0.0604415	2.96027	0.00307368	0.0044857	0.153944
Rv1339	4331.82	0.0587055	0.046715	1.25667	0.208872	0.135422	0.0525426
Rv1341	1172.1	0.125801	0.0635138	1.98069	0.047626	0.0424179	0.10576
Rv1342c	779.091	-0.126604	0.0669979	-1.88967	0.0588022	0.05058	-0.104583
Rv1351	564.482	-0.0986982	0.085808	-1.15022	0.250053	0.154843	-0.0731485
Rv1352	2222.72	-0.344244	0.0751619	-4.58003	4.64909e-06	1.42923e-05	-0.291093
Rv1353c	495.557	-0.051562	0.0750925	-0.686646	0.492306	0.245937	-0.0402499
Rv1354c	1721.5	-0.0137054	0.05323	-0.257475	0.796812	0.340268	-0.0118175
Rv1356c	802.835	-0.172106	0.152069	-1.13176	0.257735	0.158342	-0.0868014
Rv1357c	864.301	-0.0734591	0.0885478	-0.829598	0.406766	0.216382	-0.0533714
Rv1358	1167.32	-0.147066	0.140294	-1.04827	0.294515	0.174118	-0.0791651
Rv1359	1398.77	0.0952118	0.0686232	1.38746	0.165302	0.11355	0.077509
Rv1360	4123.21	-0.141719	0.0435729	-3.25247	0.00114408	0.00195312	-0.130342
Rv1362c	1628.52	-0.177632	0.0599494	-2.96304	0.00304619	0.00444975	-0.153152
Rv1363c	1561.8	-0.118531	0.0714612	-1.65868	0.0971807	0.075621	-0.0954973
Rv1364c	3836.45	0.0703352	0.0496321	1.41713	0.156445	0.108905	0.0623909
Rv1366	509.955	-0.0849631	0.0815728	-1.04156	0.297615	0.175178	-0.0643444
Rv1366A	683.809	-0.284852	0.174155	-1.63562	0.101919	0.0785238	-0.131682
Rv1367c	1412.42	0.0135778	0.0479095	0.283405	0.776866	0.333935	0.0119509
Rv1369c	7019.47	-0.0590753	0.0827157	-0.714197	0.475105	0.240767	-0.0442775
Rv1370c	1506.47	-0.278269	0.323879	-0.859176	0.390244	0.209809	-0.0612725
Rv1372	446.018	-0.343208	0.10225	-3.35654	0.000789239	0.00142873	-0.25319
Rv1373	1115.4	0.00108416	0.0622335	0.0174208	0.986101	0.387634	0.000898443
Rv1374c	5082.16	-0.251972	0.0780604	-3.22791	0.00124696	0.00209661	-0.202158
Rv1375	4192.68	0.263418	0.0510258	5.16245	2.43736e-07	9.74088e-07	0.238983
Rv1376	1340.82	0.161953	0.0445893	3.63211	0.00028111	0.000581869	0.148602
Rv1377c	826.674	0.204638	0.0564051	3.62801	0.00028561	0.000590398	0.179925
Rv1378c	793.84	0.23336	0.120664	1.93395	0.0531187	0.0464344	0.145592
Rv1382	201.267	0.179162	0.103852	1.72517	0.0844962	0.0676417	0.121534
Rv1393c	2331.08	-0.0564863	0.0599688	-0.941928	0.346229	0.193838	-0.0476349
Rv1395	490.255	-0.289623	0.0893731	-3.24061	0.00119276	0.00202073	-0.222218
Rv1401	957.623	-0.30415	0.0811399	-3.74847	0.000177918	0.000388932	-0.245139
Rv1403c	435.138	0.128257	0.093608	1.37016	0.170638	0.116701	0.0913574
Rv1404	2834.37	0.182691	0.0670991	2.72271	0.00647498	0.00841008	0.152349
Rv1405c	955.369	0.0170302	0.0793017	0.214752	0.829961	0.348952	0.0129557
Rv1410c	15163.5	0.142756	0.0717928	1.98845	0.0467622	0.0418159	0.115356
Rv1413	411.673	0.029082	0.0987008	0.294648	0.768263	0.331333	0.0198265
Rv1414	90.6822	0.153544	0.159689	0.961523	0.336289	0.189772	0.0736269
Rv1417	957.669	0.102991	0.0578504	1.7803	0.0750261	0.0615139	0.0886435
Rv1419	2115.49	0.0842954	0.0797462	1.05705	0.290491	0.172539	0.0644859
Rv1421	1821.4	0.0688797	0.0439686	1.56657	0.117216	0.087373	0.0625511
Rv1422	1545.05	0.111234	0.0737263	1.50875	0.131364	0.0956318	0.0884056
Rv1424c	1135.22	-0.0259252	0.0566443	-0.457685	0.647179	0.295984	-0.0220683
Rv1425	4077.45	-0.288547	0.0376905	-7.65568	1.92289e-14	2.28784e-13	-0.274272
Rv1428c	1799.69	-0.0591307	0.0509079	-1.16152	0.245429	0.152465	-0.0519964
Rv1429	702.753	-0.174805	0.136129	-1.28411	0.199104	0.131364	-0.0972194
Rv1431	1688.78	-0.299524	0.0918758	-3.26009	0.00111375	0.00190552	-0.22783
Rv1432	372.256	0.0348533	0.104247	0.334335	0.738127	0.323711	0.0229982
Rv1433	1894.14	0.221328	0.0458808	4.82397	1.40726e-06	4.87421e-06	0.203249
Rv1434	60.1342	0.18462	0.216871	0.851292	0.394607	0.211211	0.0646526
Rv1435c	2093.6	0.355421	0.094392	3.76537	0.000166301	0.000366105	0.275817
Rv1439c	544.158	0.0437838	0.0877703	0.498846	0.617888	0.287371	0.0318388
Rv1443c	1379.06	-0.018694	0.0763161	-0.244954	0.806492	0.342793	-0.0144516
Rv1444c	1756.87	-0.281614	0.0548401	-5.13519	2.81866e-07	1.11504e-06	-0.252886
Rv1453	1857.85	-0.0666423	0.0889166	-0.749492	0.453561	0.233158	-0.0482702
Rv1455	285.767	-0.0555024	0.1077	-0.515343	0.606313	0.283704	-0.0359297
Rv1456c	464.67	0.110665	0.0902595	1.22607	0.220172	0.140469	0.0801094
Rv1457c	1165.8	0.185264	0.0661761	2.79956	0.00511716	0.00689349	0.155269
Rv1458c	1364.61	0.0852938	0.0667478	1.27785	0.201301	0.13233	0.0699733
Rv1459c	2166.54	0.0518776	0.0577807	0.897836	0.369273	0.202948	0.0441542
Rv1460	862.241	0.913136	0.107615	8.48524	2.15271e-17	3.64704e-16	0.888393
Rv1461	13764.4	0.60847	0.0664463	9.15733	5.31982e-20	1.12049e-18	0.592003
Rv1462	2270.1	0.794005	0.078134	10.1621	2.92737e-24	8.94645e-23	0.778801
Rv1463	2343.81	0.818493	0.0565567	14.4721	1.81848e-47	2.57667e-45	0.810919
Rv1465	1036.34	0.78041	0.0922284	8.46171	2.6349e-17	4.32299e-16	0.758323
Rv1466	1600.62	0.715005	0.0838472	8.52747	1.49581e-17	2.61956e-16	0.694587
Rv1473	2741.44	0.0925229	0.0594264	1.55693	0.119486	0.0885957	0.0788591
Rv1473A	311.621	0.220588	0.0872582	2.52799	0.0114718	0.0133435	0.16685
Rv1474c	913.956	0.249337	0.082273	3.03061	0.0024406	0.00368962	0.195543
Rv1476	1414.51	-0.156515	0.0640142	-2.445	0.0144852	0.0162308	-0.131938
Rv1478	3820.98	0.00742229	0.0919274	0.0807408	0.935648	0.374988	0.00525995
Rv1480	3140.64	0.264311	0.0847952	3.11705	0.00182668	0.00287588	0.205621
Rv1481	4281.42	0.170786	0.0660666	2.58505	0.00973638	0.0116587	0.142854
Rv1482c	221.981	0.27066	0.112319	2.40975	0.0159635	0.0176337	0.180562
Rv1486c	2647.91	0.0138045	0.0681308	0.202618	0.839434	0.351593	0.0111262
Rv1487	1371.41	-0.196965	0.0760379	-2.59036	0.00958764	0.0115217	-0.157362
Rv1488	5364.68	-0.133361	0.0620053	-2.15081	0.0314916	0.0305057	-0.113106
Rv1489	1963.93	-0.14339	0.052615	-2.72526	0.00642501	0.00836819	-0.127195
Rv1489A	1262.69	0.0421201	0.0670353	0.628328	0.529789	0.25922	0.0342309
Rv1490	1826.78	-0.107049	0.0836841	-1.27921	0.200824	0.132183	-0.0804312
Rv1491c	2364.62	0.138895	0.0553966	2.50728	0.0121665	0.0140259	0.121634
Rv1496	897.011	0.0751434	0.0611709	1.22842	0.21929	0.140079	0.0632611
Rv1498A	294.926	-0.267894	0.140429	-1.90768	0.0564323	0.0487997	-0.150444
Rv1498c	2059.13	-0.0683238	0.052789	-1.29428	0.195568	0.129854	-0.0597327
Rv1499	333.174	-0.0232176	0.0964744	-0.240661	0.809818	0.343832	-0.0160324
Rv1500	1814.4	-0.225307	0.0742762	-3.03337	0.00241842	0.0036632	-0.182891
Rv1501	1908.59	-0.198677	0.0886188	-2.24193	0.0249658	0.0252187	-0.148192
Rv1502	4636.19	0.0299828	0.0589574	0.50855	0.611067	0.285057	0.0252767
Rv1503c	411.163	0.127703	0.0956934	1.3345	0.18204	0.122616	0.0898364
Rv1504c	1274.48	-0.0549675	0.0877584	-0.62635	0.531085	0.259569	-0.040021
Rv1505c	1108.16	0.248896	0.0779697	3.19221	0.00141187	0.00233359	0.199589
Rv1506c	909.523	0.0884313	0.0870561	1.0158	0.309726	0.179661	0.064955
Rv1507A	1788.8	-0.11483	0.0654394	-1.75475	0.0793013	0.0642419	-0.095405
Rv1507c	2117.29	-0.104313	0.0783958	-1.33059	0.183324	0.123374	-0.0806982
Rv1508A	350.859	-0.0485494	0.0939299	-0.516869	0.605248	0.283376	-0.0340878
Rv1508c	5194.17	-0.0605833	0.0484919	-1.24935	0.211538	0.136406	-0.0538523
Rv1509	981.048	-0.239498	0.171757	-1.3944	0.163196	0.1125	-0.109922
Rv1510	1317.79	0.160652	0.0554904	2.89514	0.00378991	0.00535061	0.14101
Rv1513	1342.66	-0.0751308	0.0467261	-1.6079	0.107857	0.0820047	-0.0675719
Rv1514c	1020.78	0.0359765	0.0629443	0.571562	0.567619	0.272212	0.0298
Rv1515c	1006.08	-0.149945	0.081182	-1.84702	0.0647441	0.0546653	-0.115277
Rv1516c	746.136	-0.0106116	0.0745261	-0.142387	0.886774	0.363342	-0.0082781
Rv1517	360.74	-0.170864	0.142668	-1.19763	0.23106	0.145739	-0.0912026
Rv1518	306.448	0.076535	0.141418	0.541196	0.588373	0.278109	0.0404213
Rv1519	372.121	-0.230441	0.129303	-1.78218	0.07472	0.0612952	-0.136209
Rv1520	1354.89	-0.183419	0.0740554	-2.47679	0.0132571	0.0151045	-0.147641
Rv1523	861.999	-0.0229039	0.0703206	-0.325707	0.744646	0.325438	-0.01827
Rv1524	635.399	0.0933233	0.0813802	1.14676	0.251482	0.155543	0.0708567
Rv1526c	778.218	-0.137341	0.172307	-0.797071	0.42541	0.223327	-0.0609159
Rv1531	1097.76	-0.107526	0.0570977	-1.8832	0.0596738	0.0512003	-0.0929606
Rv1532c	745.437	0.0554233	0.0600016	0.923697	0.355644	0.1981	0.0467205
Rv1533	2271.13	0.120325	0.0588449	2.04479	0.040876	0.0375431	0.1034
Rv1534	1302.64	0.0754313	0.0580583	1.29923	0.193864	0.128909	0.0644695
Rv1535	1194.25	0.0211785	0.101543	0.208567	0.834786	0.350424	0.0141921
Rv1540	2577.52	0.106621	0.0664558	1.60438	0.10863	0.0825517	0.0879811
Rv1543	5587.31	-0.0609541	0.0383372	-1.58995	0.111846	0.084221	-0.0564386
Rv1544	2418.27	0.0532601	0.0830554	0.641261	0.521353	0.256284	0.039814
Rv1545	737.66	0.239382	0.100855	2.37354	0.0176186	0.0191691	0.168594
Rv1546	1397.05	0.164591	0.0574102	2.86693	0.0041447	0.00575763	0.143305
Rv1556	837.896	-0.324469	0.119498	-2.71528	0.00662195	0.00856529	-0.213935
Rv1558	1362.94	-0.00516356	0.0566726	-0.0911121	0.927404	0.372642	-0.00438649
Rv1565c	7578.2	0.164305	0.040748	4.03222	5.52527e-05	0.000136264	0.152852
Rv1566c	2466.66	0.153604	0.0664959	2.30998	0.0208895	0.0219906	0.127831
Rv1567c	701.789	-0.214717	0.0697949	-3.07641	0.00209512	0.00324604	-0.177804
Rv1571	106.024	0.257244	0.174575	1.47354	0.140605	0.100528	0.117024
Rv1572c	113.698	0.0402045	0.274571	0.146426	0.883585	0.363111	0.0104203
Rv1573	80.4675	0.50508	0.210802	2.396	0.0165753	0.0182192	0.22816
Rv1574	276.126	-0.225594	0.106601	-2.11624	0.0343241	0.0326609	-0.152784
Rv1575	335.777	-0.137013	0.130908	-1.04664	0.295266	0.17419	-0.0779414
Rv1576c	3687.95	-0.388535	0.0787396	-4.93442	8.03889e-07	2.9621e-06	-0.332127
Rv1577c	2757.22	-0.633276	0.101232	-6.25567	3.95802e-10	2.63637e-09	-0.591514
Rv1578c	447.077	0.0874137	0.136804	0.638968	0.522843	0.256749	0.0475481
Rv1579c	177.71	-0.332283	0.129755	-2.56086	0.0104414	0.0123197	-0.207105
Rv1580c	442.811	-0.0634838	0.0954673	-0.66498	0.506063	0.250561	-0.044245
Rv1581c	365.442	-0.131607	0.105532	-1.24709	0.212366	0.136711	-0.0873472
Rv1582c	729.77	-0.527426	0.158901	-3.31921	0.000902714	0.00159163	-0.342755
Rv1583c	220.871	0.23714	0.155328	1.52671	0.126834	0.0930295	0.119925
Rv1584c	607.599	-0.396008	0.0825992	-4.79433	1.63217e-06	5.56663e-06	-0.334694
Rv1585c	1492.82	-0.847811	0.143907	-5.89138	3.82988e-09	2.17068e-08	-0.793761
Rv1586c	1829.16	-0.832925	0.127021	-6.55738	5.47601e-11	4.14324e-10	-0.791887
Rv1587c	3407.85	-0.67837	0.35413	-1.9156	0.0554165	0.0480924	-0.172848
Rv1588c	1322.02	-0.33196	0.308388	-1.07643	0.281733	0.169255	-0.0794832
Rv1590	740.693	0.251442	0.0900913	2.79096	0.00525514	0.0070489	0.189157
Rv1591	1602.43	0.0874373	0.0551262	1.58613	0.11271	0.0845395	0.0759827
Rv1592c	4120.62	-0.480433	0.0869098	-5.52795	3.24001e-08	1.54434e-07	-0.425491
Rv1593c	4219.24	-0.226535	0.0961891	-2.3551	0.0185179	0.0199554	-0.163178
Rv1597	3557.39	0.0652289	0.0668973	0.975061	0.32953	0.187451	0.0532584
Rv1598c	1341.67	0.0461449	0.0675404	0.683219	0.494469	0.24676	0.0374298
Rv1610	456.662	0.245369	0.0838685	2.92564	0.00343749	0.00491991	0.190552
Rv1615	3125.19	0.0867276	0.0681755	1.27212	0.203329	0.133152	0.0706467
Rv1616	1987.33	0.207429	0.0856031	2.42315	0.0153866	0.0170691	0.157749
Rv1619	1343.84	-0.203583	0.0572263	-3.5575	0.000374399	0.000741486	-0.178338
Rv1624c	2132.82	-0.386278	0.0662848	-5.82755	5.62456e-09	3.08684e-08	-0.346004
Rv1626	10945.7	0.0870537	0.03578	2.43303	0.0149731	0.0167148	0.0819206
Rv1627c	3488.83	0.0679411	0.0753357	0.901844	0.36714	0.202132	0.0530985
Rv1628c	1879.65	-0.297768	0.0623133	-4.77856	1.76559e-06	5.98239e-06	-0.260811
Rv1632c	1096.46	0.276	0.0772048	3.5749	0.000350356	0.000701877	0.22422
Rv1634	1844.76	0.134591	0.058541	2.2991	0.0214995	0.0224898	0.116094
Rv1635c	1710.03	-0.0297864	0.0553355	-0.538288	0.590378	0.278758	-0.0255152
Rv1637c	2531.75	0.137509	0.0618903	2.22182	0.0262958	0.0262223	0.11677
Rv1638A	4571.78	-0.282159	0.0552267	-5.10911	3.2368e-07	1.26758e-06	-0.253037
Rv1639c	16456.6	-0.276788	0.0495856	-5.58202	2.3774e-08	1.15796e-07	-0.253089
Rv1645c	926.801	0.0761655	0.0772076	0.986503	0.323886	0.185073	0.0590054
Rv1647	1148.69	0.0746113	0.049493	1.50751	0.13168	0.0958169	0.0663012
Rv1648	1942.19	-0.164893	0.0478732	-3.44437	0.000572383	0.00108269	-0.14946
Rv1667c	244.7	-0.0256492	0.110402	-0.232325	0.816285	0.34573	-0.0163015
Rv1668c	494.282	-0.0556346	0.082732	-0.672468	0.501286	0.248828	-0.0416764
Rv1670	357.799	-0.404056	0.106903	-3.77964	0.000157058	0.000348711	-0.305368
Rv1671	245.781	-0.584514	0.157235	-3.71744	0.00020125	0.000433253	-0.4191
Rv1672c	1193.14	-0.141171	0.0623597	-2.26382	0.0235852	0.0240895	-0.119676
Rv1673c	236.37	-0.529977	0.17812	-2.9754	0.00292608	0.00428635	-0.305659
Rv1674c	132.691	-0.402127	0.210809	-1.90754	0.0564508	0.0487997	-0.162869
Rv1676	3309.9	-0.053639	0.0421378	-1.27294	0.203039	0.133079	-0.0488112
Rv1678	1863.74	-0.0389613	0.0510074	-0.763836	0.444965	0.230258	-0.0340567
Rv1680	965.69	-0.195482	0.067055	-2.91525	0.00355409	0.00506354	-0.163431
Rv1682	591.321	0.0225218	0.112991	0.199324	0.842009	0.352376	0.0140894
Rv1683	7435.76	-0.081544	0.0531147	-1.53524	0.124724	0.0917842	-0.071424
Rv1684	330.591	0.0679559	0.0928715	0.73172	0.46434	0.236979	0.0481143
Rv1685c	763.806	0.170499	0.062986	2.70694	0.0067907	0.00874727	0.144766
Rv1686c	422.298	0.133858	0.0865622	1.54638	0.122014	0.0901781	0.0994643
Rv1687c	408.976	-0.0353648	0.0911728	-0.387888	0.698099	0.312128	-0.0252026
Rv1691	784.094	0.165177	0.103444	1.59678	0.110315	0.0834666	0.111901
Rv1692	635.336	0.237507	0.0703328	3.3769	0.00073307	0.00134264	0.197213
Rv1693	445.939	0.00210274	0.107124	0.019629	0.984339	0.387203	0.00136231
Rv1697	8685.71	-0.124631	0.0682335	-1.82653	0.0677699	0.0569118	-0.102257
Rv1700	2135.15	0.200935	0.0681859	2.94686	0.00321016	0.00464142	0.167236
Rv1701	1974.92	0.190125	0.0565644	3.36121	0.000776007	0.00140804	0.16671
Rv1702c	1401.46	0.189899	0.262594	0.723167	0.469577	0.238559	0.0530811
Rv1703c	4039	0.0359223	0.0479708	0.748837	0.453955	0.23322	0.031762
Rv1706A	803.85	-2.39405	0.27895	-8.58235	9.29505e-18	1.66523e-16	-2.24415
Rv1707	10040	-0.182073	0.0550349	-3.30833	0.000938557	0.00164737	-0.160542
Rv1708	2409.02	0.0920767	0.0475842	1.93503	0.0529871	0.0463453	0.0828444
Rv1711	1913.63	-0.00561181	0.0424681	-0.132142	0.894872	0.364737	-0.00502756
Rv1714	266.603	0.525693	0.172275	3.05147	0.00227722	0.0034922	0.312837
Rv1716	380.948	0.41819	0.183051	2.28455	0.0223392	0.0230498	0.202676
Rv1717	93.9802	0.281534	0.177082	1.58985	0.111869	0.084221	0.127702
Rv1718	334.353	0.291296	0.111645	2.60912	0.00907753	0.0110363	0.197192
Rv1719	266.746	-0.0690905	0.432123	-0.159886	0.872971	0.360991	-0.0101522
Rv1722	665.248	-0.139825	0.105029	-1.33129	0.183093	0.123272	-0.0932507
Rv1723	447.924	0.130211	0.0749135	1.73816	0.0821832	0.0661143	0.103212
Rv1724c	522.206	-0.247321	0.0978105	-2.52858	0.0114526	0.0133311	-0.177833
Rv1725c	454.075	-0.0294686	0.0835929	-0.352524	0.724445	0.31974	-0.0219127
Rv1726	300.818	-0.0192801	0.122674	-0.157165	0.875115	0.361511	-0.0113694
Rv1727	333.293	0.00244049	0.0912678	0.0267399	0.978667	0.38574	0.00173598
Rv1728c	1636.19	-0.144662	0.0587813	-2.46102	0.0138542	0.0156279	-0.124825
Rv1729c	1346.4	-0.110826	0.0486801	-2.27663	0.0228084	0.0234343	-0.0995742
Rv1730c	1387.9	-0.0991748	0.091924	-1.07888	0.280642	0.168822	-0.0709474
Rv1732c	1246.03	-0.144452	0.0625914	-2.30786	0.0210069	0.0220634	-0.122384
Rv1733c	2518.77	-1.9812	0.255184	-7.76379	8.24262e-15	1.01962e-13	-1.87565
Rv1734c	9309.63	-2.12883	0.243762	-8.73322	2.47521e-18	4.7629e-17	-2.02539
Rv1735c	1134.68	-2.80548	0.289658	-9.68549	3.47528e-22	8.73657e-21	-2.61706
Rv1738	13335.9	-1.7504	0.22169	-7.89569	2.88721e-15	3.81364e-14	-1.67796
Rv1739c	6794.46	-2.10819	0.308404	-6.83581	8.15441e-12	6.9452e-11	-1.94798
Rv1742	733.584	-0.257896	0.0632269	-4.0789	4.52495e-05	0.00011357	-0.22244
Rv1744c	632.278	0.0622798	0.0704648	0.883843	0.376781	0.206274	0.0498992
Rv1747	9655.55	0.179831	0.040261	4.46664	7.94579e-06	2.3192e-05	0.167738
Rv1748	581.247	-0.0387683	0.0675382	-0.574021	0.565953	0.27167	-0.0314132
Rv1749c	1389.07	-0.210791	0.0599889	-3.51384	0.000441675	0.000861588	-0.182637
Rv1751	5358.24	-0.00371788	0.0535613	-0.0694136	0.94466	0.377231	-0.00319945
Rv1752	579.918	0.157142	0.0844162	1.86151	0.0626722	0.0533566	0.118814
Rv1754c	4955.31	-0.452019	0.0523612	-8.63272	5.9912e-18	1.0986e-16	-0.432294
Rv1756c	7014.93	-0.0581647	0.0825978	-0.704192	0.481313	0.24202	-0.0436185
Rv1757c	1496.88	-0.275584	0.322091	-0.855608	0.392215	0.210301	-0.061063
Rv1760	2694.22	-0.0608291	0.0558739	-1.08869	0.276293	0.166849	-0.0523396
Rv1761c	448.678	0.210921	0.0788304	2.67563	0.00745883	0.00943633	0.166594
Rv1762c	583.399	-0.078664	0.0758282	-1.0374	0.29955	0.175852	-0.0614278
Rv1763	1506.47	-0.278269	0.323879	-0.859176	0.390244	0.209809	-0.0612725
Rv1764	6418.18	-0.0515926	0.0875878	-0.589039	0.555835	0.268467	-0.0375862
Rv1765A	2196.12	0.0257495	0.0679603	0.37889	0.704769	0.31385	0.0207893
Rv1765c	3097.41	-0.160072	0.127367	-1.25677	0.208835	0.135422	-0.0935712
Rv1766	627.967	-0.0486012	0.0907574	-0.535506	0.5923	0.279327	-0.0347582
Rv1767	294.202	-0.0600637	0.093634	-0.641473	0.521215	0.256284	-0.0422965
Rv1769	3052.25	0.078542	0.0463734	1.69369	0.0903248	0.0714429	0.0708093
Rv1770	2415.88	0.0963348	0.0705144	1.36617	0.171885	0.11729	0.0776637
Rv1771	3564.7	0.030818	0.0517546	0.595465	0.551533	0.266802	0.0268048
Rv1772	4670.85	0.0543737	0.0510121	1.0659	0.28647	0.170942	0.0477274
Rv1773c	2050.77	0.0765559	0.0576914	1.32699	0.184512	0.123901	0.0655622
Rv1774	1086.82	-0.0388191	0.0617939	-0.628202	0.529871	0.25922	-0.0323448
Rv1775	1395.81	0.174134	0.0568443	3.06335	0.00218872	0.00336763	0.152184
Rv1776c	964.461	0.091257	0.0547916	1.66553	0.0958074	0.0748248	0.079493
Rv1778c	557.571	-0.000293186	0.146889	-0.00199596	0.998407	0.390698	-0.000149138
Rv1779c	1059.91	0.156734	0.0823037	1.90434	0.0568659	0.0491041	0.119918
Rv1780	1912.95	0.0933365	0.0556532	1.67711	0.0935216	0.0733966	0.0810142
Rv1786	378.184	-0.417903	0.133237	-3.13654	0.00170956	0.00274136	-0.275433
Rv1794	13534.8	-0.0960368	0.0536161	-1.79119	0.0732624	0.0603856	-0.0841977
Rv1804c	319.248	-1.06655	0.170366	-6.26031	3.84222e-10	2.58129e-09	-1.01306
Rv1805c	5139.68	-0.530223	0.13758	-3.85394	0.000116233	0.0002671	-0.393031
Rv1810	8839.84	-0.199805	0.0534376	-3.73903	0.000184731	0.000402134	-0.177758
Rv1812c	3301.37	-0.288376	0.121169	-2.37996	0.0173147	0.0189119	-0.184117
Rv1813c	12048.6	-0.694135	0.229187	-3.02869	0.0024562	0.00370961	-0.378628
Rv1815	9370.42	-0.107811	0.095879	-1.12445	0.260822	0.159735	-0.0754652
Rv1816	4019.69	-0.00765171	0.0669575	-0.114277	0.909018	0.368144	-0.00620117
Rv1817	1292.94	-0.12615	0.0610404	-2.06667	0.0387653	0.0360721	-0.107366
Rv1823	1440.23	-0.0778351	0.0621495	-1.25238	0.21043	0.135867	-0.0652509
Rv1824	902.068	-0.13369	0.0742433	-1.80071	0.0717489	0.0593263	-0.10643
Rv1825	2880.7	-0.156048	0.0435856	-3.58027	0.000343235	0.000692079	-0.143652
Rv1828	8981.11	-0.0396626	0.0699687	-0.566861	0.570808	0.272992	-0.0317498
Rv1829	5936.22	-0.142404	0.060964	-2.33587	0.0194981	0.020801	-0.121566
Rv1830	6706.4	0.0568634	0.0621373	0.915126	0.360125	0.19961	0.0474606
Rv1831	4430.81	-0.246097	0.0764078	-3.22084	0.00127817	0.00213068	-0.198752
Rv1833c	1567.79	-0.309954	0.0905279	-3.42385	0.000617402	0.00115384	-0.238745
Rv1835c	2995.08	0.282537	0.0505986	5.58389	2.35197e-08	1.14917e-07	0.25774
Rv1836c	6959.83	0.206697	0.0492662	4.19551	2.72262e-05	7.25395e-05	0.187125
Rv1841c	3770.6	-0.00724294	0.0503272	-0.143917	0.885566	0.363342	-0.00631387
Rv1842c	3188.31	0.0698892	0.071519	0.977212	0.328464	0.187179	0.0557623
Rv1847	1664.74	0.0416287	0.0663296	0.627603	0.530264	0.259329	0.0339478
Rv1855c	2724.54	0.131042	0.0573627	2.28445	0.0223454	0.0230498	0.113598
Rv1856c	2158.04	0.901971	0.0606403	14.8741	4.85265e-50	8.40388e-48	0.894229
Rv1861	718.627	-0.0109383	0.0686427	-0.159351	0.873393	0.360991	-0.00879258
Rv1863c	7300.51	-0.0488435	0.0654205	-0.746609	0.4553	0.233743	-0.040057
Rv1864c	668.654	-0.160124	0.0668024	-2.39699	0.0165306	0.0181957	-0.133202
Rv1865c	524.714	-0.0905315	0.0851502	-1.0632	0.287692	0.171409	-0.0672516
Rv1866	860.241	-0.156003	0.0929091	-1.6791	0.0931333	0.0732222	-0.112272
Rv1867	688.945	-0.0497054	0.0737741	-0.673752	0.500469	0.248581	-0.0390631
Rv1868	2320.64	0.0729275	0.0484475	1.50529	0.13225	0.0960972	0.0650701
Rv1869c	6253.96	0.279915	0.0589101	4.75157	2.01842e-06	6.70783e-06	0.247282
Rv1870c	15245.7	0.326367	0.0786781	4.14813	3.35209e-05	8.6933e-05	0.269074
Rv1871c	49826	-0.207677	0.0456712	-4.54721	5.43606e-06	1.64841e-05	-0.190563
Rv1873	161.748	0.0777689	0.12098	0.642822	0.520339	0.256003	0.0465474
Rv1874	1205.07	-0.198808	0.0570468	-3.48499	0.000492154	0.000945853	-0.174169
Rv1875	1321.57	-0.154727	0.0798171	-1.93852	0.0525598	0.0461009	-0.119986
Rv1877	4623.8	0.102266	0.0426396	2.39838	0.016468	0.0181396	0.0940508
Rv1879	3422.06	0.10755	0.051714	2.07972	0.0375513	0.0352795	0.0953143
Rv1882c	3494.7	0.148705	0.0470694	3.15927	0.00158166	0.00257599	0.135029
Rv1883c	17775.3	0.0820815	0.0817415	1.00416	0.315301	0.181726	0.0620729
Rv1885c	3626.87	-0.26011	0.0631764	-4.11721	3.83493e-05	9.78273e-05	-0.224526
Rv1887	13246.2	0.223186	0.0602797	3.70251	0.000213478	0.000456219	0.19355
Rv1888A	238.776	-0.198495	0.0999697	-1.98556	0.0470825	0.0420514	-0.138589
Rv1888c	3208.37	0.127156	0.0499778	2.54426	0.0109511	0.0128626	0.113863
Rv1889c	312.154	0.0130905	0.095866	0.13655	0.891387	0.363902	0.00906828
Rv1890c	375.755	-0.132588	0.162571	-0.81557	0.414746	0.219215	-0.0622105
Rv1891	3425.91	-0.120774	0.0392302	-3.0786	0.00207974	0.00322864	-0.112666
Rv1892	2202.21	-0.118641	0.0849511	-1.39658	0.162541	0.112197	-0.0886985
Rv1893	2132.52	-0.306827	0.056184	-5.46111	4.73174e-08	2.2015e-07	-0.276023
Rv1894c	3547.25	-0.380727	0.0608689	-6.25487	3.97845e-10	2.63869e-09	-0.346425
Rv1895	911.782	-0.451621	0.0784205	-5.75896	8.46335e-09	4.48682e-08	-0.403403
Rv1896c	1118.6	-0.0158489	0.0475995	-0.332963	0.739162	0.323982	-0.0139702
Rv1897c	320.619	0.126647	0.0912505	1.38791	0.165164	0.11355	0.0914391
Rv1898	1050.56	0.119221	0.0568687	2.09643	0.0360441	0.0341029	0.103397
Rv1903	760.14	-0.198021	0.0793699	-2.49491	0.0125988	0.0144283	-0.155454
Rv1904	8022.21	-0.237307	0.0712492	-3.33066	0.000866389	0.00154506	-0.196161
Rv1906c	3891.96	-0.16951	0.0534025	-3.17419	0.00150258	0.00246263	-0.150289
Rv1907c	982.184	0.109269	0.121076	0.902478	0.366803	0.202132	0.06567
Rv1910c	848.896	-0.074762	0.0939393	-0.795854	0.426117	0.223453	-0.0526516
Rv1913	614.748	-0.245047	0.101473	-2.41491	0.0157391	0.0173982	-0.17234
Rv1914c	387.339	-0.126625	0.100121	-1.26472	0.205973	0.134401	-0.0867363
Rv1919c	2721.51	-0.0766797	0.0405342	-1.89173	0.0585271	0.0503712	-0.0707532
Rv1920	1171.28	-0.381355	0.0622095	-6.13018	8.77812e-10	5.49472e-09	-0.345565
Rv1922	874.574	-0.0800591	0.101803	-0.786413	0.431626	0.225432	-0.0538522
Rv1924c	1531.57	0.0206857	0.0530778	0.389723	0.696741	0.311789	0.0178624
Rv1927	769.615	-0.0600612	0.0711118	-0.844602	0.398333	0.212815	-0.0479416
Rv1928c	876.334	0.0452507	0.0700901	0.645607	0.518534	0.255461	0.0362279
Rv1929c	1450.91	-0.0181903	0.133717	-0.136036	0.891793	0.363902	-0.0100266
Rv1930c	52.3121	0.0329559	0.202196	0.16299	0.870526	0.360567	0.0121988
Rv1931c	163.005	-0.159635	0.151396	-1.05442	0.291691	0.172998	-0.0805732
Rv1936	499.757	-0.222243	0.067732	-3.28121	0.00103364	0.0017861	-0.186196
Rv1937	1584.5	-0.0464602	0.0630034	-0.737425	0.460864	0.235668	-0.038539
Rv1939	143.758	0.0175335	0.127169	0.137875	0.890339	0.363846	0.0100588
Rv1941	2458.89	0.175635	0.0603049	2.91245	0.003586	0.00509968	0.151139
Rv1944c	273.73	-0.0701811	0.108268	-0.648219	0.516844	0.254765	-0.0453475
Rv1945	2162.82	-0.239723	0.211368	-1.13415	0.256733	0.157833	-0.0879811
Rv1947	990.772	0.268494	0.0555394	4.8343	1.33616e-06	4.66947e-06	0.23971
Rv1948c	338.507	-0.210321	0.126052	-1.66852	0.0952118	0.074498	-0.125857
Rv1949c	490.895	-0.203937	0.230624	-0.884283	0.376544	0.206248	-0.0668633
Rv1950c	133.771	-0.253059	0.14189	-1.78349	0.0745065	0.0611845	-0.139843
Rv1951c	166.979	0.0530658	0.138139	0.384148	0.700869	0.312828	0.0285256
Rv1954c	937.928	-0.675696	0.10942	-6.17524	6.60639e-10	4.20283e-09	-0.632123
Rv1957	1648.14	-0.984188	0.100375	-9.80507	1.07075e-22	2.82864e-21	-0.965028
Rv1958c	2465.39	-0.668943	0.0941234	-7.10709	1.18519e-12	1.1333e-11	-0.6386
Rv1961	224.6	-0.107818	0.107022	-1.00743	0.313727	0.181239	-0.0705869
Rv1972	188.708	-0.440608	0.300096	-1.46822	0.142044	0.101232	-0.116104
Rv1973	68.8525	0.00524632	0.199839	0.0262528	0.979056	0.38574	0.00196561
Rv1974	149.359	-0.299651	0.123217	-2.43191	0.0150195	0.0167453	-0.190192
Rv1975	695.491	-0.283642	0.0629895	-4.503	6.69998e-06	1.99671e-05	-0.246648
Rv1976c	618.916	-0.0402251	0.0721288	-0.557684	0.57706	0.274593	-0.0318466
Rv1977	1968.13	-0.0674938	0.0420895	-1.60358	0.108807	0.0826378	-0.0617315
Rv1978	1259.78	-0.046995	0.0802356	-0.585713	0.558069	0.269128	-0.0356572
Rv1979c	5024.43	0.137198	0.0589102	2.32894	0.0198624	0.0211319	0.118182
Rv1985c	902.913	-0.379985	0.0921776	-4.12232	3.75081e-05	9.58381e-05	-0.303586
Rv1986	871.843	0.0269359	0.0741638	0.363195	0.71646	0.317153	0.0210722
Rv1987	4204.79	-0.0482867	0.0519223	-0.929979	0.352382	0.196717	-0.0421481
Rv1989c	2271.94	-0.599648	0.0747537	-8.02165	1.04334e-15	1.46503e-14	-0.577244
Rv1990A	796.041	-0.540848	0.0991214	-5.45641	4.85844e-08	2.25373e-07	-0.481538
Rv1990c	958.252	-0.119357	0.0836711	-1.4265	0.153724	0.10754	-0.0899016
Rv1993c	4256.04	-2.04939	0.244809	-8.37139	5.69447e-17	9.05671e-16	-1.94883
Rv1995	595.841	-1.40995	0.130368	-10.8151	2.9185e-27	1.29968e-25	-1.38746
Rv1996	16944	-2.21006	0.128028	-17.2624	9.02806e-67	3.51785e-64	-2.17941
Rv1998c	5804.98	-1.6159	0.285841	-5.65315	1.57529e-08	7.92032e-08	-1.49663
Rv1999c	214.937	-1.02998	0.186233	-5.53061	3.19114e-08	1.52571e-07	-0.958833
Rv2000	817.066	-0.181399	0.162579	-1.11576	0.264524	0.161431	-0.0861319
Rv2001	714.213	-0.191827	0.102402	-1.87328	0.06103	0.0521795	-0.131743
Rv2003c	2068.17	-1.00889	0.150253	-6.7146	1.88582e-11	1.50733e-10	-0.964993
Rv2004c	4612.31	-1.14741	0.202293	-5.672	1.41144e-08	7.18926e-08	-1.07563
Rv2005c	3444.26	-1.43133	0.237152	-6.03548	1.58493e-09	9.46486e-09	-1.35046
Rv2008c	573.757	-0.434333	0.0968711	-4.48362	7.33868e-06	2.16634e-05	-0.355152
Rv2011c	294.347	-0.528431	0.132878	-3.97682	6.98441e-05	0.000169566	-0.400976
Rv2012	200.902	-0.627314	0.153721	-4.08085	4.48711e-05	0.000112803	-0.48809
Rv2013	43.5318	0.16076	0.262745	0.611848	0.540638	0.26294	0.0446129
Rv2014	490.275	0.0825835	0.374393	0.22058	0.82542	0.347803	0.0145627
Rv2015c	3281.19	-0.122118	0.125809	-0.970664	0.331716	0.187891	-0.0714592
Rv2016	1236.41	-1.06535	0.145643	-7.3148	2.57756e-13	2.7145e-12	-1.02781
Rv2017	954.556	-0.932709	0.148426	-6.28402	3.29928e-10	2.23581e-09	-0.88398
Rv2018	1170.32	-0.365208	0.0812049	-4.49737	6.88001e-06	2.03867e-05	-0.304233
Rv2019	688.16	0.00216535	0.0794227	0.0272636	0.97825	0.38574	0.00164557
Rv2020c	1182.35	0.00196287	0.053557	0.0366501	0.970764	0.384221	0.00168913
Rv2021c	1367.47	-0.201132	0.0671815	-2.99385	0.00275479	0.00409637	-0.168231
Rv2022c	909.05	-0.100202	0.0702208	-1.42696	0.153591	0.107495	-0.0809696
Rv2023A	363.721	-0.0762345	0.114258	-0.667215	0.504635	0.250092	-0.0475335
Rv2023c	357.988	0.219288	0.0773293	2.83576	0.00457161	0.0062576	0.174955
Rv2024c	2304.7	-0.101641	0.0407482	-2.49437	0.0126182	0.0144293	-0.0941426
Rv2025c	1324.58	-0.691057	0.111834	-6.17928	6.43932e-10	4.11333e-09	-0.647344
Rv2026c	767.738	-0.327998	0.0743736	-4.41014	1.03302e-05	2.95754e-05	-0.276065
Rv2028c	3272.16	-1.90791	0.322122	-5.92293	3.16249e-09	1.80555e-08	-1.74653
Rv2030c	28633.6	-2.20235	0.3502	-6.28882	3.19889e-10	2.18679e-09	-1.99087
Rv2033c	1158.39	-0.830026	0.115958	-7.15798	8.18766e-13	8.02613e-12	-0.796599
Rv2034	134.811	-0.512963	0.158128	-3.24398	0.00117874	0.00200476	-0.327812
Rv2035	659.294	-0.61861	0.0792558	-7.80523	5.93939e-15	7.52627e-14	-0.594704
Rv2036	1186.55	-0.544496	0.0666807	-8.16572	3.19515e-16	4.93075e-15	-0.522663
Rv2037c	1245.88	-0.415816	0.123365	-3.37061	0.000750027	0.00136828	-0.289927
Rv2038c	523.52	-0.207173	0.084536	-2.45071	0.0142575	0.0160333	-0.15848
Rv2039c	388.538	-0.261206	0.164267	-1.59013	0.111805	0.084221	-0.126542
Rv2040c	816.617	-0.208647	0.0731591	-2.85197	0.00434493	0.00601434	-0.169656
Rv2041c	952.918	-0.289116	0.0578517	-4.99753	5.80692e-07	2.21834e-06	-0.257132
Rv2042c	1020.44	-0.249473	0.0581299	-4.29164	1.77356e-05	4.88397e-05	-0.219488
Rv2044c	227.248	0.108131	0.104354	1.03619	0.300114	0.176051	0.0719478
Rv2047c	2140.64	0.239772	0.0455899	5.25931	1.44593e-07	6.04202e-07	0.220932
Rv2049c	559.143	0.289638	0.0789239	3.66985	0.000242697	0.000511183	0.23454
Rv2050	2206.03	-0.0664582	0.0608078	-1.09292	0.274428	0.166174	-0.0559408
Rv2052c	1914.76	-0.0295611	0.103342	-0.28605	0.77484	0.333343	-0.0196058
Rv2054	1605.99	0.164124	0.0725728	2.26151	0.0237277	0.0242192	0.132626
Rv2059	881.955	-0.109513	0.251872	-0.434798	0.663709	0.301333	-0.0317064
Rv2061c	746.202	0.108703	0.0884582	1.22886	0.219123	0.140029	0.0794887
Rv2067c	2904.4	-0.0251887	0.0438813	-0.57402	0.565954	0.27167	-0.0225447
Rv2073c	209.208	0.165294	0.11003	1.50227	0.133028	0.096528	0.107604
Rv2074	2482.05	0.238294	0.0675161	3.52944	0.000416434	0.000818495	0.200586
Rv2075c	2528.52	0.0471137	0.0608965	0.773668	0.439127	0.227766	0.0394811
Rv2076c	512.906	0.0145691	0.0863183	0.168783	0.865967	0.359311	0.0106615
Rv2077A	128.52	-0.206072	0.18576	-1.10935	0.26728	0.162731	-0.0861427
Rv2077c	13521.2	-0.116864	0.104717	-1.11599	0.264426	0.161431	-0.0777137
Rv2078	125.479	-0.362494	0.132126	-2.74354	0.00607814	0.00796486	-0.228019
Rv2079	1974.31	-0.00904322	0.0662366	-0.136529	0.891403	0.363902	-0.00735493
Rv2081c	4044.25	0.0352396	0.0491092	0.717576	0.473018	0.239994	0.0310125
Rv2082	3932.51	-0.0980233	0.220542	-0.444466	0.656706	0.299112	-0.0331086
Rv2083	963.192	0.138307	0.0834238	1.65788	0.0973412	0.0756831	0.104731
Rv2084	2053.2	0.161543	0.0585091	2.761	0.00576254	0.00761158	0.139893
Rv2085	885.87	0.289059	0.0582731	4.96041	7.03435e-07	2.63556e-06	0.256652
Rv2086	332.991	-0.346399	0.104981	-3.29963	0.000968126	0.00169165	-0.252265
Rv2087	46.0969	-0.171545	0.213035	-0.805246	0.420678	0.221664	-0.0611008
Rv2090	2088.4	-0.0350148	0.0436944	-0.801358	0.422924	0.222336	-0.0314571
Rv2091c	7034.86	-0.119883	0.0324997	-3.68874	0.000225371	0.000476622	-0.114248
Rv2100	2336.5	0.147077	0.0670021	2.19511	0.0281559	0.0278279	0.121946
Rv2102	1817.22	0.188974	0.0510428	3.70228	0.000213675	0.000456219	0.169548
Rv2105	1506.47	-0.278269	0.323879	-0.859176	0.390244	0.209809	-0.0612725
Rv2106	7012.88	-0.0584489	0.0826935	-0.706813	0.479682	0.241644	-0.0438098
Rv2113	894.176	0.000276324	0.0768296	0.00359658	0.99713	0.390448	0.000212928
Rv2114	5133.31	-0.0548933	0.0463151	-1.18522	0.235932	0.147932	-0.0491506
Rv2117	334.747	0.126687	0.104684	1.21019	0.226207	0.14334	0.0844278
Rv2118c	748.632	0.147054	0.0615797	2.38803	0.0169392	0.0185667	0.125254
Rv2119	571.171	-0.0535482	0.0769558	-0.695831	0.486535	0.243522	-0.0413956
Rv2120c	1136.82	0.0149304	0.0711265	0.209913	0.833736	0.350077	0.011855
Rv2125	1538.51	0.116049	0.0721381	1.60871	0.107679	0.0819205	0.0931142
Rv2128	2115.38	0.0410237	0.060061	0.683033	0.494586	0.24676	0.0344734
Rv2129c	3684.71	0.0752433	0.0582238	1.29231	0.196249	0.129914	0.0642553
Rv2132	1180.54	-0.233403	0.0636441	-3.66731	0.000245111	0.000515083	-0.199794
Rv2133c	2136.42	-0.109807	0.0659948	-1.66387	0.0961376	0.0749965	-0.0908832
Rv2134c	4603.04	-0.100706	0.0543986	-1.85127	0.0641312	0.0543049	-0.0880567
Rv2135c	2037.17	0.0587534	0.0732478	0.802118	0.422485	0.222315	0.0463643
Rv2136c	5705.69	0.00322992	0.0867997	0.0372112	0.970317	0.384221	0.00235668
Rv2137c	21752.7	-0.305297	0.129845	-2.35124	0.0187109	0.0201265	-0.186781
Rv2141c	2114.16	0.0737453	0.0479579	1.53771	0.12412	0.091426	0.0659534
Rv2143	1533.62	0.118243	0.0545056	2.16937	0.0300548	0.0294618	0.103661
Rv2144c	6813.02	-0.0787734	0.0433674	-1.81642	0.0693059	0.0578278	-0.0719109
Rv2146c	2285.13	0.0648572	0.0755019	0.859014	0.390333	0.209809	0.0506176
Rv2147c	7992.1	-0.000601342	0.0384361	-0.0156452	0.987517	0.387967	-0.00054499
Rv2148c	1235.18	0.120353	0.0521123	2.30948	0.0209168	0.0219983	0.106685
Rv2159c	3798.87	-0.336702	0.0935511	-3.59913	0.000319289	0.000653089	-0.259211
Rv2160A	1716.78	-0.35552	0.10051	-3.53716	0.000404458	0.000797976	-0.267108
Rv2161c	7088.86	-0.0499984	0.0788083	-0.634431	0.5258	0.258022	-0.0382471
Rv2164c	1110.99	0.38479	0.0788462	4.88027	1.05943e-06	3.796e-06	0.327976
Rv2165c	1802.07	0.364006	0.0558033	6.52302	6.89042e-11	5.06586e-10	0.334325
Rv2166c	5621.9	0.501514	0.0472751	10.6084	2.723e-26	1.06104e-24	0.489139
Rv2167c	7013.92	-0.0588653	0.0827847	-0.711065	0.477044	0.240842	-0.0441019
Rv2168c	1506.47	-0.278269	0.323879	-0.859176	0.390244	0.209809	-0.0612725
Rv2169c	3234.28	-0.468943	0.0639827	-7.32922	2.31489e-13	2.47127e-12	-0.440445
Rv2170	271.275	0.056504	0.0877728	0.643753	0.519736	0.255867	0.0411437
Rv2172c	5478.8	-0.102675	0.0555003	-1.84998	0.0643159	0.0543921	-0.0893537
Rv2175c	1236.46	-0.0185683	0.0495134	-0.375016	0.707649	0.314324	-0.0162572
Rv2177c	773.001	0.0435717	0.139524	0.312289	0.754821	0.328169	0.0232093
Rv2179c	230.188	0.0337905	0.114555	0.294972	0.768015	0.331318	0.0209503
Rv2180c	591.545	0.0690233	0.0848385	0.813584	0.415883	0.219657	0.0511896
Rv2181	5094.13	0.0397651	0.0477641	0.832533	0.405108	0.215868	0.0352275
Rv2182c	8841.77	-0.326201	0.049213	-6.62834	3.39472e-11	2.64556e-10	-0.302159
Rv2183c	1522.53	0.185229	0.0574129	3.22626	0.00125419	0.00210423	0.161708
Rv2184c	3025.47	0.0777959	0.0739765	1.05163	0.29297	0.173464	0.0613513
Rv2186c	621.838	-0.102256	0.0816679	-1.2521	0.210535	0.135878	-0.0776416
Rv2189c	1628.82	0.0692625	0.0983493	0.704251	0.481277	0.24202	0.0474912
Rv2190c	18696.2	-0.210611	0.0639225	-3.29479	0.000984954	0.00171146	-0.179236
Rv2191	380.648	0.0321016	0.0977905	0.328269	0.742708	0.324897	0.0220067
Rv2197c	2954.65	0.180364	0.0800631	2.25278	0.0242732	0.0246308	0.140474
Rv2199c	4920.55	-0.0814662	0.0386271	-2.10904	0.0349409	0.0332073	-0.0758047
Rv2203	7797.75	-0.021103	0.0348898	-0.604848	0.54528	0.264598	-0.0193951
Rv2204c	9101.39	-0.0839469	0.0409883	-2.04807	0.0405532	0.0373919	-0.0774555
Rv2205c	1005.57	-0.0336438	0.150555	-0.223465	0.823174	0.347139	-0.0167539
Rv2206	1438.83	0.0419498	0.0750574	0.558902	0.576228	0.274568	0.0327125
Rv2209	3777.57	0.103335	0.0649055	1.59209	0.111364	0.0841146	0.0858944
Rv2212	1856.89	-0.0323053	0.0524202	-0.616277	0.537712	0.26194	-0.0280301
Rv2216	2673.16	0.270495	0.064919	4.16665	3.09111e-05	8.0973e-05	0.232364
Rv2219	4099.4	-0.0487831	0.0475787	-1.02532	0.305214	0.178238	-0.0433689
Rv2219A	996.728	0.00937985	0.0622046	0.15079	0.880141	0.362722	0.00777573
Rv2223c	2971.47	0.0266925	0.0656725	0.406448	0.684413	0.308121	0.0217961
Rv2226	1340.05	0.0830252	0.0578258	1.43578	0.151064	0.106204	0.0711632
Rv2227	1223.17	0.212076	0.0720932	2.9417	0.00326421	0.00471083	0.173514
Rv2228c	1308.51	0.187888	0.0694274	2.70626	0.00680461	0.00875794	0.155022
Rv2229c	966.008	0.108231	0.0497371	2.17606	0.0295509	0.0290592	0.096764
Rv2230c	687.479	0.14782	0.0692077	2.13588	0.0326889	0.0313925	0.121196
Rv2235	988.73	0.0711206	0.0589032	1.20741	0.227272	0.143939	0.0604801
Rv2237	2984.06	-0.148125	0.0416373	-3.55751	0.000374386	0.000741486	-0.137244
Rv2237A	1246.25	-0.0324768	0.0660255	-0.491883	0.622802	0.288874	-0.0264913
Rv2239c	4226.23	0.0169117	0.0524901	0.322188	0.74731	0.326269	0.014631
Rv2240c	1513.45	0.125744	0.106914	1.17612	0.239546	0.149705	0.0826588
Rv2242	1691.88	0.242774	0.0706945	3.43413	0.000594463	0.00111767	0.201509
Rv2248	3476.59	0.22478	0.063711	3.52812	0.000418529	0.000821578	0.192008
Rv2250A	137.885	-0.185892	0.146963	-1.26489	0.205911	0.134401	-0.0970865
Rv2250c	215.472	0.0663662	0.12793	0.518769	0.603922	0.282925	0.0380181
Rv2251	1241.89	0.034867	0.0584728	0.596295	0.550978	0.266693	0.0294819
Rv2252	1356.49	-0.0076825	0.0809441	-0.0949111	0.924385	0.371813	-0.00579078
Rv2253	414.586	-0.0683027	0.100652	-0.6786	0.497392	0.247605	-0.0461904
Rv2254c	364.882	0.217433	0.0937265	2.31986	0.0203483	0.0215312	0.158387
Rv2255c	635.748	0.515645	0.0762101	6.76609	1.32307e-11	1.0911e-10	0.481127
Rv2256c	7982.48	0.167682	0.0523404	3.20369	0.0013568	0.00224793	0.149306
Rv2257c	967.468	0.12213	0.0675339	1.80842	0.0705408	0.0585447	0.100522
Rv2258c	2598.06	0.14645	0.0656715	2.23003	0.0257454	0.025789	0.122233
Rv2260	1490.12	0.196345	0.045649	4.3012	1.69874e-05	4.69452e-05	0.179974
Rv2261c	433.914	0.140998	0.0815268	1.72947	0.0837253	0.0671972	0.107982
Rv2262c	447.891	-0.115962	0.145593	-0.79648	0.425753	0.223432	-0.0600566
Rv2263	443.397	-0.0962734	0.0918897	-1.04771	0.294774	0.174118	-0.068851
Rv2264c	1550.77	0.0377062	0.0506781	0.744033	0.456857	0.23413	0.0329939
Rv2265	265.397	0.0718528	0.132626	0.54177	0.587977	0.278046	0.0400185
Rv2267c	502.953	-0.347646	0.131468	-2.64434	0.00818497	0.0101329	-0.216924
Rv2269c	120.229	-0.460636	0.184499	-2.49669	0.0125357	0.0143878	-0.231878
Rv2271	1951.81	0.0559225	0.120537	0.463943	0.642689	0.29523	0.0334842
Rv2272	1613.44	0.336402	0.0678675	4.95674	7.16846e-07	2.66023e-06	0.292326
Rv2273	220.716	0.323255	0.0999804	3.23318	0.00122421	0.00206727	0.238357
Rv2275	727.644	0.322742	0.0693708	4.65242	3.28066e-06	1.04354e-05	0.277022
Rv2277c	248.884	-0.133011	0.250838	-0.530266	0.595927	0.280359	-0.0388391
Rv2278	1496.88	-0.275584	0.322091	-0.855608	0.392215	0.210301	-0.061063
Rv2279	7014.91	-0.0587301	0.0825744	-0.711239	0.476936	0.240842	-0.0440515
Rv2280	3953.1	-0.0338899	0.0615493	-0.550614	0.581899	0.276261	-0.0282483
Rv2282c	276.617	-0.138634	0.145121	-0.955296	0.339428	0.19099	-0.0723267
Rv2285	1915.23	-0.0822467	0.0465253	-1.76778	0.077097	0.0628811	-0.0741705
Rv2286c	885.904	0.0719726	0.0577218	1.24689	0.212439	0.136711	0.0615618
Rv2288	911.372	-0.328147	0.10296	-3.18712	0.00143696	0.00237004	-0.238714
Rv2292c	470.845	0.178586	0.0982007	1.81858	0.0689755	0.0577066	0.125285
Rv2293c	1429.97	0.0817358	0.0507624	1.61017	0.107362	0.0818275	0.0723581
Rv2294	1060.25	0.0207448	0.0631509	0.328496	0.742537	0.324897	0.0171348
Rv2295	3502.95	-0.0375595	0.0645826	-0.581573	0.560855	0.270138	-0.0308743
Rv2296	3175.11	-0.0338099	0.0432075	-0.782501	0.43392	0.226119	-0.0304157
Rv2297	1472.19	-0.0989707	0.0610425	-1.62134	0.104944	0.0802597	-0.0838023
Rv2298	2339.29	0.0475436	0.0550475	0.863683	0.387762	0.209809	0.040929
Rv2300c	1156.22	-0.0737579	0.0742304	-0.993635	0.320401	0.183681	-0.0580459
Rv2302	2243.25	-0.263317	0.0647838	-4.06454	4.81265e-05	0.000119827	-0.22588
Rv2303c	3135.4	-0.152363	0.0634169	-2.40257	0.0162804	0.0179457	-0.128729
Rv2304c	260.541	-0.00732815	0.0992767	-0.0738153	0.941157	0.376342	-0.00497524
Rv2305	472.479	0.0706348	0.118701	0.595066	0.551799	0.266848	0.0428348
Rv2306A	165.043	0.171917	0.129392	1.32865	0.183963	0.123697	0.0995688
Rv2306B	140.19	0.224187	0.123378	1.81708	0.0692046	0.0578052	0.137073
Rv2307A	169.33	-0.313539	0.20367	-1.53944	0.123696	0.0912428	-0.124251
Rv2307B	292.204	-0.32107	0.154741	-2.07488	0.0379972	0.0355484	-0.170452
Rv2307D	498.77	-0.149006	0.130823	-1.13899	0.254707	0.157101	-0.0850395
Rv2307c	365.901	0.0264873	0.105668	0.250665	0.802073	0.341847	0.0173217
Rv2308	449.467	-0.0609609	0.130523	-0.467052	0.640462	0.294605	-0.0343536
Rv2309A	79.124	-0.260003	0.174765	-1.48773	0.136822	0.0986587	-0.118297
Rv2309c	1123.68	-0.137004	0.1407	-0.973732	0.33019	0.187513	-0.073401
Rv2311	251.451	-0.118662	0.178528	-0.66467	0.506262	0.25058	-0.0505912
Rv2312	492.011	-0.197884	0.152995	-1.2934	0.195873	0.129857	-0.100021
Rv2313c	2585.45	-0.0545477	0.0444454	-1.2273	0.219711	0.14029	-0.0492057
Rv2314c	2345.7	0.0826594	0.0664897	1.24319	0.213798	0.137358	0.0678655
Rv2315c	1589.8	-0.123165	0.0440739	-2.79451	0.00519783	0.00699007	-0.112904
Rv2319c	231.686	0.023848	0.169677	0.140549	0.888226	0.363547	0.0105986
Rv2323c	529.382	0.548299	0.0853619	6.42323	1.33411e-10	9.5385e-10	0.509158
Rv2324	319.042	0.334617	0.0924236	3.62047	0.000294064	0.000606266	0.258799
Rv2325c	2151.08	0.126923	0.0575403	2.20582	0.0273969	0.0272158	0.109867
Rv2326c	4850.96	0.0845165	0.0582402	1.45117	0.146732	0.103908	0.0723222
Rv2327	1051.98	0.252383	0.0705325	3.57825	0.000345897	0.000695646	0.210198
Rv2331	1392.39	0.0756915	0.0887859	0.852517	0.393927	0.211065	0.0549359
Rv2331A	495.558	0.275462	0.0877996	3.1374	0.00170453	0.0027389	0.211821
Rv2336	3497.64	-0.427241	0.0618996	-6.90217	5.12146e-12	4.48145e-11	-0.395916
Rv2337c	3702.87	-0.172559	0.0529461	-3.25913	0.00111753	0.00190988	-0.153338
Rv2342	876.608	-0.0318066	0.0636979	-0.499335	0.617543	0.28732	-0.0262361
Rv2345	5035.12	0.0159908	0.0836796	0.191096	0.848451	0.353967	0.0118762
Rv2348c	7046.75	-0.334468	0.0848677	-3.94105	8.1127e-05	0.000192463	-0.268801
Rv2354	1496.88	-0.275584	0.322091	-0.855608	0.392215	0.210301	-0.061063
Rv2355	7016.46	-0.0588411	0.0826039	-0.712329	0.476261	0.240842	-0.0441282
Rv2360c	1057.65	0.0588465	0.0753302	0.781181	0.434696	0.226373	0.0459261
Rv2361c	1735.21	0.0150355	0.047157	0.318839	0.749849	0.326813	0.013273
Rv2365c	184.304	0.0606036	0.121861	0.497317	0.618965	0.287526	0.0360102
Rv2366c	3636.59	-0.0359223	0.0683281	-0.525732	0.599074	0.281415	-0.0289816
Rv2367c	2657.25	-0.0556785	0.0693255	-0.803146	0.42189	0.222077	-0.0448236
Rv2369c	360.001	-0.0526215	0.10253	-0.513232	0.607789	0.283872	-0.0351298
Rv2372c	1730.73	0.0377666	0.0777557	0.485709	0.627174	0.289983	0.0290155
Rv2375	7442.49	0.0227889	0.0495629	0.459797	0.645662	0.295731	0.0199631
Rv2387	3408.89	-0.207243	0.0389389	-5.32226	1.02485e-07	4.4495e-07	-0.19453
Rv2390c	1000.48	-0.0265305	0.0663355	-0.399944	0.689198	0.309391	-0.0215936
Rv2395	4547.48	0.0860617	0.0394485	2.18162	0.0291375	0.0286908	0.0799094
Rv2401	422.504	-0.243372	0.0910623	-2.67259	0.0075268	0.00949919	-0.181566
Rv2401A	72.4478	-0.175183	0.209221	-0.837312	0.402417	0.214654	-0.0637387
Rv2402	3232.04	-0.108638	0.053839	-2.01782	0.0436098	0.0395874	-0.0953773
Rv2405	1701.74	-0.100028	0.0612292	-1.63366	0.102329	0.0787233	-0.0846377
Rv2406c	3942.87	-0.234269	0.061684	-3.7979	0.00014593	0.000328685	-0.202342
Rv2407	196.499	-0.193878	0.152071	-1.27492	0.202338	0.132843	-0.0984171
Rv2409c	1244.28	-0.109167	0.0662405	-1.64804	0.0993435	0.0770347	-0.0902282
Rv2410c	2009.9	-0.220413	0.0709083	-3.10843	0.00188085	0.00294628	-0.181752
Rv2411c	3678.81	-0.166811	0.0604439	-2.75977	0.00578416	0.00763368	-0.143271
Rv2413c	1789.6	0.207983	0.0708563	2.93528	0.00333246	0.00479158	0.171072
Rv2414c	1530.9	0.333529	0.0603708	5.52468	3.30089e-08	1.56856e-07	0.298097
Rv2415c	197.314	0.13115	0.158283	0.828575	0.407345	0.216616	0.0631071
Rv2417c	1032.99	0.25737	0.075489	3.40937	0.000651128	0.00120531	0.209541
Rv2418c	961.896	-0.02746	0.0634426	-0.432832	0.665137	0.301718	-0.0226661
Rv2420c	602.352	0.0746177	0.0774036	0.964008	0.335042	0.189411	0.0577292
Rv2422	54.5123	-0.0743735	0.241594	-0.307844	0.758201	0.328893	-0.0225351
Rv2423	442.143	-0.291741	0.123295	-2.3662	0.0179718	0.0195065	-0.184235
Rv2424c	848.621	0.135614	0.131918	1.02801	0.303945	0.177563	0.0766451
Rv2425c	1881.87	0.00612034	0.0395284	0.154834	0.876952	0.361946	0.00553187
Rv2426c	1409.84	-0.0314038	0.0834448	-0.376342	0.706662	0.314186	-0.0233743
Rv2432c	280.339	0.0172657	0.147921	0.116723	0.90708	0.367699	0.00873017
Rv2433c	74.6062	0.0638743	0.19025	0.335739	0.737068	0.323519	0.025302
Rv2434c	1035.46	-0.0168843	0.0774849	-0.217904	0.827504	0.348493	-0.0129706
Rv2435c	2031.7	-0.150376	0.0778906	-1.9306	0.0535321	0.0467433	-0.117752
Rv2437	429.698	0.0148478	0.112901	0.131512	0.895371	0.364737	0.00929144
Rv2438A	94.3255	0.0351846	0.169246	0.20789	0.835315	0.350551	0.0156836
Rv2446c	579.38	0.0780946	0.0850473	0.918249	0.358489	0.199056	0.0579278
Rv2449c	1689.24	-0.005386	0.0581402	-0.0926382	0.926191	0.372251	-0.00454656
Rv2451	356.923	-0.25081	0.246441	-1.01773	0.308807	0.179577	-0.07714
Rv2452c	100.513	-0.103781	0.226599	-0.457994	0.646956	0.295984	-0.0340049
Rv2454c	6804.97	-0.0944241	0.0614296	-1.53711	0.124266	0.0914904	-0.0797242
Rv2455c	14600.2	-0.126369	0.0633462	-1.99489	0.046055	0.0413591	-0.106337
Rv2456c	2732.95	0.25695	0.0429007	5.98941	2.10602e-09	1.2294e-08	0.23946
Rv2459	8709.61	-0.224624	0.0544134	-4.12809	3.65782e-05	9.39241e-05	-0.199752
Rv2464c	1604.57	0.19748	0.052048	3.79419	0.000148124	0.000331234	0.176637
Rv2466c	926.514	-0.911004	0.137807	-6.61074	3.82409e-11	2.96534e-10	-0.868358
Rv2468A	385.315	-0.150661	0.106458	-1.41522	0.157004	0.109246	-0.0998624
Rv2468c	2411.54	0.0850631	0.0874593	0.972602	0.330751	0.187666	0.0623016
Rv2469c	1509.65	-0.0229568	0.0470742	-0.487673	0.625781	0.289655	-0.0203014
Rv2472	785.961	-0.212145	0.102414	-2.07144	0.038318	0.0358055	-0.146618
Rv2473	1127.26	0.116526	0.0561483	2.07533	0.0379559	0.035531	0.101355
Rv2474c	2162.31	0.0265971	0.0505139	0.526531	0.598519	0.281395	0.0232295
Rv2475c	1676.59	0.0700529	0.0763332	0.917725	0.358763	0.199138	0.0544733
Rv2477c	8822.44	0.0751767	0.0382709	1.96433	0.0494914	0.0438787	0.069941
Rv2478c	186.392	0.179718	0.152998	1.17464	0.240137	0.149954	0.0903287
Rv2479c	7013.62	-0.0587775	0.082615	-0.711462	0.476798	0.240842	-0.0440773
Rv2480c	1506.47	-0.278269	0.323879	-0.859176	0.390244	0.209809	-0.0612725
Rv2481c	325.084	-0.106316	0.10095	-1.05316	0.292268	0.173143	-0.0721816
Rv2484c	5617.64	-0.196837	0.065077	-3.02467	0.00248902	0.00374827	-0.166186
Rv2488c	1194.03	-0.107893	0.0502275	-2.14809	0.0317065	0.0306948	-0.0962518
Rv2489c	61.8288	-0.145021	0.2187	-0.663106	0.507263	0.250916	-0.0498388
Rv2491	89.9241	-0.364307	0.234437	-1.55397	0.120192	0.0889529	-0.125973
Rv2492	260.423	-0.152529	0.149282	-1.02175	0.306901	0.178954	-0.0778399
Rv2499c	1791.64	-0.163725	0.0555337	-2.94821	0.00319622	0.00462986	-0.143733
Rv2506	543.595	-0.155551	0.104563	-1.48762	0.136851	0.0986587	-0.104416
Rv2507	2875.1	-0.173888	0.0551659	-3.15209	0.00162107	0.00263193	-0.153086
Rv2508c	1851.55	-0.0230667	0.0636141	-0.362603	0.716901	0.317258	-0.0190152
Rv2509	2509.2	0.0584152	0.0360152	1.62196	0.104812	0.0802451	0.0545009
Rv2510c	1740.73	-0.00930734	0.0503117	-0.184994	0.853234	0.355392	-0.00811512
Rv2512c	16252.8	-0.234351	0.0903317	-2.59434	0.00947738	0.0114332	-0.175005
Rv2513	1761	-0.317396	0.0599146	-5.29747	1.1742e-07	4.933e-07	-0.282513
Rv2514c	471.507	-0.288211	0.14966	-1.92577	0.0541334	0.0471627	-0.154653
Rv2515c	616.523	-0.50482	0.0971627	-5.19562	2.04043e-07	8.32534e-07	-0.439513
Rv2516c	4860	-0.742953	0.112606	-6.59781	4.17268e-11	3.20378e-10	-0.705051
Rv2517c	1269.21	-0.982315	0.136374	-7.2031	5.88583e-13	5.91861e-12	-0.945407
Rv2520c	599.259	0.075716	0.0951242	0.79597	0.426049	0.223453	0.0529605
Rv2522c	1408.38	0.310221	0.0544448	5.69789	1.21298e-08	6.26025e-08	0.281121
Rv2525c	1927.54	-0.154792	0.0502588	-3.07991	0.00207066	0.00321774	-0.138844
Rv2529	230.947	0.0628947	0.175891	0.357577	0.72066	0.318379	0.0270273
Rv2531c	6008.74	0.0498719	0.0457422	1.09028	0.275589	0.166683	0.0446828
Rv2532c	806.444	0.0576837	0.0550613	1.04763	0.294811	0.174118	0.0497785
Rv2536	2799.51	0.0471189	0.0612218	0.769642	0.441512	0.228851	0.0394247
Rv2542	2429.8	0.271863	0.0553562	4.91115	9.05428e-07	3.30498e-06	0.243079
Rv2548A	1162.36	-0.202013	0.082551	-2.44712	0.0144001	0.0161821	-0.15602
Rv2551c	172.988	0.217761	0.121727	1.78892	0.0736271	0.060622	0.13417
Rv2553c	4952.98	0.0149546	0.0330787	0.45209	0.651204	0.297426	0.0137705
Rv2554c	672.968	0.114299	0.112581	1.01526	0.309981	0.179742	0.072426
Rv2556c	2715.48	0.100323	0.0639743	1.56818	0.116838	0.0871744	0.083735
Rv2557	6164.01	-0.498672	0.0699507	-7.1289	1.01175e-12	9.79472e-12	-0.468169
Rv2558	7438.02	-0.432064	0.0889061	-4.85978	1.17518e-06	4.1872e-06	-0.365364
Rv2559c	1312.72	-0.334879	0.100303	-3.33869	0.000841749	0.00151324	-0.248313
Rv2560	1065.64	-0.163914	0.0713343	-2.29783	0.0215717	0.0225502	-0.133313
Rv2561	585.996	-0.234169	0.0793454	-2.95126	0.00316478	0.00459285	-0.185622
Rv2562	480.858	-0.172726	0.139664	-1.23673	0.216188	0.13878	-0.0939522
Rv2563	1850.56	-0.0508892	0.0462186	-1.10105	0.270873	0.164277	-0.0455227
Rv2565	3579.6	-0.0295611	0.052379	-0.564369	0.572503	0.273466	-0.0256389
Rv2566	1701.77	0.00788083	0.0582182	0.135367	0.892322	0.363988	0.00665091
Rv2567	3215.07	0.161808	0.0367323	4.40505	1.05758e-05	3.01349e-05	0.152495
Rv2568c	1309.66	0.0852491	0.0541562	1.57413	0.115456	0.0862722	0.0743782
Rv2569c	611.243	-0.0768075	0.0827258	-0.92846	0.353169	0.197086	-0.0577143
Rv2570	236.786	-0.025621	0.10262	-0.249669	0.802843	0.341989	-0.0170627
Rv2571c	941.295	0.0411141	0.0547615	0.750784	0.452782	0.232892	0.0353863
Rv2573	133.135	0.20716	0.138175	1.49925	0.133808	0.0968987	0.114953
Rv2574	879.593	-0.0008036	0.0697576	-0.0115199	0.990809	0.3887	-0.000642246
Rv2575	2696.24	0.147671	0.0557652	2.64809	0.00809472	0.0100933	0.129252
Rv2576c	5027.06	0.162681	0.0811821	2.0039	0.0450811	0.040639	0.125417
Rv2577	502.892	-0.151538	0.200792	-0.754703	0.450427	0.232159	-0.0573908
Rv2578c	353.151	0.276566	0.104345	2.6505	0.00803715	0.01003	0.193931
Rv2581c	880.284	-0.0310541	0.0670981	-0.462816	0.643496	0.295253	-0.0251932
Rv2585c	3556.6	0.0132936	0.0759539	0.175022	0.861062	0.357983	0.0102939
Rv2597	1254.84	0.0133367	0.0587692	0.226933	0.820476	0.346563	0.0112316
Rv2598	312.515	0.0625095	0.0953368	0.65567	0.512036	0.252876	0.0435943
Rv2599	494.951	-0.0821333	0.0757762	-1.08389	0.278412	0.167675	-0.0641948
Rv2600	1964.13	0.399969	0.107868	3.70797	0.000208929	0.000448544	0.299573
Rv2603c	3492.92	0.0956782	0.0417219	2.29324	0.0218344	0.0227181	0.08822
Rv2609c	2162.03	0.226522	0.0681754	3.32263	0.000891734	0.0015769	0.189558
Rv2611c	1315.32	0.291826	0.0906569	3.21902	0.00128632	0.00213969	0.2226
Rv2613c	1250.98	0.0757681	0.0668165	1.13397	0.256806	0.157833	0.0620169
Rv2614A	54.2452	0.575183	0.244975	2.34793	0.0188782	0.0202785	0.231679
Rv2616	346.52	0.132539	0.089296	1.48427	0.137738	0.0990199	0.0969107
Rv2617c	700.672	-0.0624417	0.102065	-0.611782	0.540682	0.26294	-0.0418436
Rv2618	348.279	-0.0374624	0.0936043	-0.40022	0.688994	0.309389	-0.0263284
Rv2619c	480.684	-0.280469	0.113956	-2.46122	0.0138467	0.0156279	-0.186202
Rv2620c	527.555	-0.255697	0.152749	-1.67397	0.0941367	0.0737679	-0.132423
Rv2621c	546.517	-0.280576	0.111828	-2.509	0.0121074	0.0139681	-0.188657
Rv2622	296.156	-0.609238	0.203686	-2.99106	0.00278011	0.00412322	-0.338165
Rv2624c	12351	-2.65907	0.313779	-8.47433	2.36434e-17	3.9625e-16	-2.4519
Rv2625c	13073.6	-2.59596	0.365494	-7.10259	1.22439e-12	1.15659e-11	-2.32878
Rv2627c	8409.31	-2.35656	0.270143	-8.72337	2.70034e-18	5.13272e-17	-2.21763
Rv2628	3348.32	-3.06477	0.263975	-11.6101	3.66175e-31	1.96804e-29	-2.89186
Rv2629	24829.4	-2.61245	0.195549	-13.3596	1.04153e-40	1.08224e-38	-2.52946
Rv2630	4721.24	-2.31131	0.153156	-15.0913	1.84836e-51	3.60114e-49	-2.26571
Rv2631	10395.7	-0.950555	0.0957349	-9.92903	3.11272e-23	8.98441e-22	-0.932265
Rv2632c	4935.04	-0.433258	0.0550905	-7.86449	3.70605e-15	4.77385e-14	-0.409408
Rv2633c	6189.12	-0.616441	0.0776113	-7.94267	1.97874e-15	2.68185e-14	-0.593514
Rv2636	483.645	-0.272782	0.0720957	-3.78362	0.000154567	0.000343669	-0.226912
Rv2638	1663.56	-0.384279	0.0718643	-5.34728	8.92853e-08	3.95349e-07	-0.336834
Rv2639c	673.859	-0.0220802	0.0857684	-0.25744	0.796839	0.340268	-0.0162132
Rv2640c	318.597	0.0293828	0.103185	0.284759	0.775829	0.333673	0.0195057
Rv2642	1498.42	0.114292	0.162292	0.704233	0.481287	0.24202	0.0535321
Rv2644c	296.938	-0.276337	0.0970199	-2.84825	0.00439609	0.00607436	-0.202052
Rv2645	92.7472	0.502595	0.167608	2.99862	0.00271202	0.00404114	0.297831
Rv2646	441.938	0.266874	0.101556	2.62784	0.00859291	0.0105791	0.189329
Rv2647	192.12	0.0217694	0.146738	0.148356	0.882062	0.362938	0.0110877
Rv2648	1506.47	-0.278269	0.323879	-0.859176	0.390244	0.209809	-0.0612725
Rv2649	7014.56	-0.0588011	0.0827391	-0.71068	0.477282	0.240842	-0.0440646
Rv2650c	1216.95	-0.202374	0.0866204	-2.33633	0.0194742	0.0207898	-0.152819
Rv2651c	1607.02	-0.661338	0.0919241	-7.19439	6.27403e-13	6.2286e-12	-0.631968
Rv2652c	303.284	-0.497103	0.192171	-2.58677	0.00968806	0.0116244	-0.24975
Rv2653c	36.9213	-0.136608	0.403661	-0.338421	0.735046	0.322904	-0.0220103
Rv2655c	411.361	-0.00953158	0.0921091	-0.103481	0.917581	0.370127	-0.00674793
Rv2656c	1055.81	0.568103	0.0735866	7.72019	1.16154e-14	1.40342e-13	0.543374
Rv2657c	1206.16	0.222861	0.139028	1.60299	0.108938	0.0826648	0.123735
Rv2658c	680.305	-0.0340407	0.10813	-0.314814	0.752903	0.327522	-0.021943
Rv2659c	1308.17	-0.0673274	0.13368	-0.503645	0.614511	0.286165	-0.0372391
Rv2660c	3474.29	-1.0322	0.201432	-5.12428	2.98675e-07	1.17557e-06	-0.944038
Rv2661c	375.223	-0.729414	0.128494	-5.67664	1.37363e-08	7.01964e-08	-0.673474
Rv2662	312.844	-0.242525	0.0981291	-2.47149	0.013455	0.0153076	-0.173744
Rv2663	544.984	-0.287051	0.107744	-2.66421	0.00771697	0.00971559	-0.198377
Rv2664	543.038	-0.18191	0.0785165	-2.31684	0.0205124	0.0216901	-0.142929
Rv2665	2156.06	-0.0304422	0.10201	-0.298424	0.765379	0.330455	-0.0203522
Rv2666	1589.11	-0.107396	0.12213	-0.879358	0.379207	0.206731	-0.064108
Rv2668	256.898	-0.310613	0.135695	-2.28904	0.0220768	0.0228612	-0.183989
Rv2669	227.719	-0.320197	0.110803	-2.88979	0.00385494	0.00542277	-0.221588
Rv2670c	400.254	-0.132158	0.104823	-1.26077	0.207391	0.135097	-0.0881003
Rv2672	1980.96	-0.163071	0.0621681	-2.62306	0.00871435	0.0106864	-0.138843
Rv2675c	1514.56	0.00785343	0.0515957	0.152211	0.879021	0.362636	0.00681275
Rv2676c	965.365	0.0930279	0.0528993	1.75858	0.078648	0.0638455	0.0817759
Rv2680	1570.83	0.237921	0.0621704	3.82691	0.000129761	0.000294395	0.205211
Rv2681	2449.24	0.153334	0.0700799	2.18799	0.0286703	0.0282826	0.125277
Rv2683	1542.66	0.0800282	0.0656386	1.21922	0.222759	0.141598	0.0659559
Rv2686c	1915.28	0.0600009	0.0620043	0.96769	0.333199	0.188506	0.0501439
Rv2687c	1405.99	-0.115219	0.0715004	-1.61145	0.107083	0.0816547	-0.0927487
Rv2688c	2283.83	-0.0908791	0.0728404	-1.24765	0.21216	0.136701	-0.0722847
Rv2689c	509.257	-0.0173079	0.108426	-0.159629	0.873174	0.360991	-0.0111287
Rv2690c	1828.93	-0.204117	0.075236	-2.71302	0.00666736	0.00860973	-0.164032
Rv2693c	2628.76	-0.241205	0.0651614	-3.70165	0.000214198	0.000456711	-0.205409
Rv2694c	3241.94	-0.488334	0.0971617	-5.026	5.00828e-07	1.92742e-06	-0.419077
Rv2695	227.8	0.167914	0.099212	1.69248	0.0905549	0.0715004	0.116761
Rv2696c	3547.54	0.305574	0.0616273	4.95841	7.10713e-07	2.64377e-06	0.269087
Rv2698	1546.45	-0.0273891	0.0674266	-0.406206	0.684591	0.308121	-0.0221752
Rv2699c	970.219	-0.100118	0.0702531	-1.42511	0.154125	0.107639	-0.0808866
Rv2700	1425.95	0.139204	0.0718735	1.93678	0.0527717	0.0462347	0.11236
Rv2704	1410.74	0.105434	0.0753578	1.39911	0.161781	0.111772	0.0829599
Rv2705c	604.089	-0.0355634	0.0622476	-0.571322	0.567781	0.272212	-0.0295535
Rv2706c	1771.22	0.158863	0.14387	1.10421	0.269501	0.163794	0.0839113
Rv2707	5608.42	-0.130885	0.0741709	-1.76464	0.0776245	0.0631461	-0.104179
Rv2708c	1421.39	-0.127722	0.0686376	-1.86082	0.0627702	0.0534037	-0.104635
Rv2709	1416.25	-0.0784302	0.0999685	-0.784549	0.432718	0.225601	-0.0533261
Rv2712c	2624.43	0.031664	0.0850247	0.372409	0.709588	0.315006	0.0233615
Rv2714	4000.22	-0.116686	0.0360148	-3.23994	0.00119555	0.00202327	-0.110001
Rv2715	9053.4	-0.0794398	0.0668445	-1.18843	0.234665	0.147363	-0.065061
Rv2716	2206.72	-0.135637	0.0609967	-2.22367	0.0261703	0.0261306	-0.115647
Rv2717c	775.001	-0.018117	0.0668535	-0.270996	0.786394	0.337286	-0.0146978
Rv2719c	353.194	-0.00436015	0.100882	-0.0432203	0.965526	0.383218	-0.00293213
Rv2721c	15314.8	0.0949491	0.0637886	1.48849	0.13662	0.0986587	0.0792361
Rv2722	526.118	-0.0650653	0.0884359	-0.735734	0.461892	0.235962	-0.0472486
Rv2723	2527.49	-0.154979	0.102684	-1.50927	0.131229	0.0956227	-0.105204
Rv2728c	215.859	0.0892966	0.109424	0.816057	0.414467	0.219207	0.057442
Rv2729c	1347.18	-0.210315	0.0621451	-3.38426	0.000713709	0.0013118	-0.180447
Rv2730	86.4893	-0.505308	0.286132	-1.766	0.0773961	0.0630233	-0.149777
Rv2731	1735.26	-0.136175	0.0788407	-1.72722	0.0841288	0.0673822	-0.105761
Rv2732c	998.248	0.147777	0.0818926	1.80452	0.0711496	0.0589558	0.113105
Rv2733c	1554.33	0.0679712	0.0505674	1.34417	0.178893	0.120862	0.0600083
Rv2734	994.882	-0.11658	0.0792144	-1.4717	0.141102	0.100791	-0.0899947
Rv2735c	681.733	-0.280197	0.149429	-1.87512	0.0607762	0.0520195	-0.149902
Rv2737A	219.083	0.106057	0.115832	0.915611	0.359871	0.19954	0.0657848
Rv2738c	236.257	0.0254287	0.110571	0.229977	0.81811	0.346033	0.0161447
Rv2739c	420.656	0.36662	0.10184	3.59995	0.000318279	0.000651878	0.275768
Rv2742c	1069.97	0.0902649	0.0533253	1.69272	0.0905081	0.0715004	0.0791455
Rv2743c	1872.22	-0.187834	0.0689323	-2.72491	0.00643199	0.00836819	-0.155362
Rv2749	471.998	0.134356	0.0756545	1.77592	0.0757468	0.062007	0.106157
Rv2750	1591.16	0.211576	0.0674555	3.13653	0.00170958	0.00274136	0.177097
Rv2751	2503.84	0.107888	0.0721793	1.49472	0.134987	0.0975855	0.0864068
Rv2752c	5889.9	0.0126655	0.0365156	0.346851	0.728703	0.320751	0.0115556
Rv2762c	260.089	0.113507	0.127703	0.888837	0.374091	0.205306	0.0655473
Rv2765	360.13	-0.19529	0.0832899	-2.3447	0.0190424	0.0204127	-0.149955
Rv2766c	848.805	-0.0245346	0.0779861	-0.314602	0.753064	0.327522	-0.0188053
Rv2767c	91.5985	-0.139682	0.16372	-0.853171	0.393565	0.210943	-0.0651898
Rv2771c	1310.44	-0.197274	0.054935	-3.59104	0.000329355	0.000668936	-0.174356
Rv2772c	1129.98	0.0706167	0.0843913	0.836777	0.402718	0.21468	0.0525163
Rv2774c	831.266	0.0830964	0.109998	0.755439	0.449986	0.232085	0.0532208
Rv2775	1891.32	-0.0707528	0.0696025	-1.01653	0.309378	0.179617	-0.0570297
Rv2776c	1908.02	-0.03292	0.0601658	-0.547154	0.584273	0.276816	-0.0276126
Rv2777c	4340.15	-0.13462	0.0687284	-1.95873	0.0501449	0.0443572	-0.110378
Rv2778c	3043.43	-0.125928	0.0489965	-2.57014	0.0101657	0.0120859	-0.113213
Rv2779c	759.794	-0.0384325	0.0730258	-0.526287	0.598689	0.281395	-0.0302794
Rv2781c	2704.87	-0.151038	0.0679089	-2.22413	0.0261399	0.0261169	-0.124739
Rv2787	1128.84	-0.139913	0.0847909	-1.65009	0.0989247	0.0767864	-0.105161
Rv2791c	7256.81	0.109784	0.109349	1.00399	0.315385	0.181726	0.070891
Rv2792c	1641.47	0.0951403	0.0696563	1.36585	0.171985	0.11729	0.0770309
Rv2795c	1999.32	0.0940916	0.0484836	1.94069	0.0522961	0.0459213	0.0843659
Rv2797c	740.985	0.12534	0.0709832	1.76578	0.0774331	0.0630233	0.101376
Rv2798c	644.516	-0.0711946	0.0716363	-0.993835	0.320303	0.183681	-0.056782
Rv2799	1189.56	-0.169357	0.0652946	-2.59373	0.00949398	0.011436	-0.142166
Rv2800	1747.66	0.0698453	0.0827357	0.844198	0.398559	0.212815	0.0524234
Rv2802c	312.583	0.293388	0.0955063	3.07192	0.00212687	0.00328869	0.218111
Rv2803	187.668	-0.28399	0.173783	-1.63417	0.102224	0.0786815	-0.131512
Rv2804c	81.6152	-0.207709	0.207571	-1.00067	0.316987	0.182379	-0.0769566
Rv2805	63.2296	0.205707	0.210934	0.975217	0.329453	0.187451	0.0747987
Rv2806	151.729	0.0974673	0.141275	0.68991	0.490251	0.244989	0.0516642
Rv2807	211.004	-0.410756	0.310712	-1.32198	0.186173	0.124646	-0.101322
Rv2808	536.297	-0.127082	0.106172	-1.19694	0.23133	0.145739	-0.0839377
Rv2809	1038.35	-0.156915	0.103905	-1.51017	0.131001	0.0955461	-0.105787
Rv2810c	969.045	-0.18211	0.144237	-1.26257	0.206743	0.134771	-0.0965913
Rv2811	38.9662	0.581137	0.526583	1.1036	0.269767	0.163794	0.0750855
Rv2814c	7013.98	-0.0588663	0.0828174	-0.710796	0.47721	0.240842	-0.0440946
Rv2815c	1506.47	-0.278269	0.323879	-0.859176	0.390244	0.209809	-0.0612725
Rv2816c	7122.36	-0.25764	0.0772642	-3.33453	0.00085443	0.00153074	-0.207921
Rv2817c	15407.7	-0.0417969	0.0732073	-0.570939	0.568041	0.272253	-0.0329119
Rv2818c	1421.42	-0.0884511	0.0839734	-1.05332	0.292194	0.173143	-0.066124
Rv2819c	1449.27	-0.221266	0.0616194	-3.59084	0.000329612	0.000668936	-0.190676
Rv2820c	751.813	-0.159053	0.0894741	-1.77764	0.0754624	0.0618391	-0.116869
Rv2821c	857.538	-0.151884	0.0911691	-1.66596	0.0957222	0.0748222	-0.11032
Rv2822c	478.97	-0.251799	0.10876	-2.31517	0.0206035	0.0217674	-0.170106
Rv2823c	1707.34	-0.145841	0.100109	-1.45681	0.145168	0.102894	-0.100326
Rv2824c	628.929	-0.063021	0.0763333	-0.825603	0.40903	0.217289	-0.0489502
Rv2825c	853.242	-0.0508888	0.0859966	-0.591754	0.554016	0.267754	-0.0374071
Rv2826c	833.768	-0.239775	0.0766033	-3.13009	0.00174753	0.00278788	-0.193096
Rv2827c	1434.98	-0.389688	0.0755996	-5.15463	2.54132e-07	1.01304e-06	-0.337682
Rv2828A	156.01	-0.038626	0.138759	-0.278367	0.780731	0.335226	-0.0206645
Rv2828c	487.131	0.0354527	0.0799803	0.443267	0.657573	0.299419	0.0269052
Rv2837c	2963.96	0.0717317	0.0750502	0.955783	0.339182	0.19099	0.0561831
Rv2840c	6430.11	0.0555436	0.0266869	2.0813	0.0374063	0.0351644	0.0534273
Rv2842c	3186.68	-0.0217399	0.0624383	-0.348183	0.727703	0.320582	-0.0180185
Rv2843	508.875	0.0296776	0.120317	0.246662	0.80517	0.342325	0.0177617
Rv2844	853.319	0.254487	0.0694955	3.66192	0.000250335	0.000525141	0.213122
Rv2850c	2106.03	0.230412	0.0699901	3.29206	0.000994548	0.00172429	0.191305
Rv2851c	1690.63	0.117289	0.0517397	2.2669	0.0233965	0.0239281	0.104093
Rv2854	577.411	-0.251724	0.102115	-2.46509	0.0136977	0.0155158	-0.176848
Rv2857c	1434.97	0.160515	0.0487842	3.29032	0.00100075	0.00173311	0.144915
Rv2859c	773.494	0.144528	0.074005	1.95295	0.050825	0.0448285	0.115455
Rv2862c	532.42	-0.203041	0.0815794	-2.48887	0.012815	0.0146221	-0.157692
Rv2864c	1098.59	-0.304186	0.0824365	-3.68995	0.000224302	0.000475005	-0.24359
Rv2867c	6218.65	-0.0420343	0.0818689	-0.513434	0.607648	0.283872	-0.0315907
Rv2876	1381.6	-0.229415	0.0724409	-3.16692	0.00154062	0.00251968	-0.188147
Rv2877c	1668.2	0.00514319	0.0480359	0.10707	0.914734	0.369552	0.0045214
Rv2879c	3411.42	0.0932524	0.0959758	0.971625	0.331237	0.187737	0.0650722
Rv2880c	757.055	0.248105	0.0912143	2.72002	0.00652771	0.00846447	0.185257
Rv2884	1253.38	-0.405085	0.0705507	-5.74176	9.36988e-09	4.91723e-08	-0.36112
Rv2885c	1669.65	-0.0636725	0.0741873	-0.858267	0.390745	0.209937	-0.0500351
Rv2887	759.598	0.436035	0.0912671	4.77756	1.77431e-06	5.9989e-06	0.366209
Rv2891	30.219	0.569263	0.287235	1.98187	0.0474933	0.0423239	0.17907
Rv2893	161.53	0.445452	0.112552	3.95774	7.56635e-05	0.000181706	0.340605
Rv2896c	735.437	0.14484	0.0801938	1.80613	0.0708987	0.0587792	0.111848
Rv2897c	118.97	-0.222306	0.281453	-0.789853	0.429614	0.224701	-0.0575246
Rv2898c	574.537	0.121393	0.0987662	1.2291	0.219035	0.140029	0.0837413
Rv2901c	5370	-0.0170259	0.0359894	-0.47308	0.636156	0.292833	-0.0155765
Rv2908c	639.698	0.0154078	0.103007	0.149581	0.881095	0.362831	0.0102335
Rv2910c	429.594	-0.429257	0.13484	-3.18346	0.00145525	0.00239768	-0.283747
Rv2912c	2641.63	-2.03853	0.302266	-6.74414	1.53933e-11	1.26276e-10	-1.88879
Rv2913c	8758.99	-2.38158	0.315329	-7.5527	4.26338e-14	4.92225e-13	-2.19416
Rv2915c	1150.54	0.0666671	0.0467627	1.42565	0.15397	0.107615	0.0598049
Rv2917	537.56	0.0702159	0.155353	0.451977	0.651285	0.297426	0.0340691
Rv2923c	286.369	-0.00862018	0.101476	-0.0849483	0.932302	0.374032	-0.00577685
Rv2926c	3501.9	-0.0600182	0.0787115	-0.762509	0.445756	0.2304	-0.0459979
Rv2927c	4814.55	-0.232499	0.0465226	-4.99754	5.80669e-07	2.21834e-06	-0.213321
Rv2929	971.875	0.102906	0.0694112	1.48256	0.138191	0.099212	0.0835559
Rv2943	389.914	0.0115104	0.155414	0.0740628	0.94096	0.376342	0.00556332
Rv2944	507.673	0.142349	0.0733858	1.93974	0.0524115	0.0459967	0.114044
Rv2949c	9196.46	0.102809	0.0701866	1.4648	0.142976	0.101791	0.0831342
Rv2951c	7570.2	0.0576108	0.0610924	0.943011	0.345675	0.193597	0.0483348
Rv2952	4730.79	-0.0012076	0.0385285	-0.0313431	0.974996	0.38552	-0.00109417
Rv2953	4488.11	0.0998485	0.0363081	2.75004	0.00595888	0.00783772	0.0939327
Rv2954c	6912.13	-0.0793604	0.0387741	-2.04674	0.0406837	0.0374327	-0.0737699
Rv2955c	1111.46	0.0403838	0.0575224	0.702053	0.482646	0.242375	0.0343286
Rv2956	1158.73	-0.239839	0.111997	-2.14148	0.0322354	0.0310526	-0.158125
Rv2957	899.998	-0.0729827	0.108322	-0.67376	0.500464	0.248581	-0.0471584
Rv2958c	1388.7	0.126165	0.122099	1.0333	0.301464	0.176511	0.0755887
Rv2959c	3220.8	0.0310855	0.0884411	0.351482	0.725227	0.319763	0.0224955
Rv2960c	412.695	-0.0121811	0.116021	-0.10499	0.916384	0.369931	-0.00747913
Rv2961	307.149	-0.0527429	0.238034	-0.221577	0.824643	0.347605	-0.0162347
Rv2962c	1550.57	-0.167883	0.0920148	-1.82453	0.0680727	0.0571045	-0.121807
Rv2963	9071.52	-0.604977	0.220175	-2.74771	0.00600138	0.00788031	-0.2987
Rv2966c	451.711	0.236876	0.0863446	2.74338	0.0060811	0.00796486	0.180998
Rv2968c	2503.81	-0.110968	0.049567	-2.23875	0.0251719	0.0253611	-0.0993268
Rv2969c	6525.85	0.0312627	0.0609404	0.513005	0.607948	0.283872	0.0261225
Rv2970A	939.912	-0.16799	0.0661167	-2.54081	0.0110597	0.0129609	-0.140414
Rv2971	3701.42	0.0575883	0.0529937	1.0867	0.277169	0.16712	0.0501574
Rv2972c	1066.79	0.28026	0.0709262	3.95143	7.7684e-05	0.000185422	0.235007
Rv2974c	307.095	0.288449	0.107551	2.68197	0.00731905	0.00930591	0.199713
Rv2975c	678.444	-0.0042695	0.138269	-0.0308781	0.975367	0.385553	-0.00228842
Rv2978c	2094.43	0.00922518	0.0613419	0.15039	0.880457	0.362757	0.00767784
Rv2979c	977.974	-0.162606	0.110109	-1.47677	0.139737	0.100091	-0.105728
Rv2980	255.284	0.26069	0.109301	2.38507	0.0170759	0.0186772	0.176236
Rv2983	189.928	-0.00230146	0.151238	-0.0152175	0.987859	0.387967	-0.00114044
Rv2989	1001.74	0.489866	0.0978341	5.0071	5.52551e-07	2.12124e-06	0.419848
Rv2990c	5934.85	-0.920798	0.0788131	-11.6833	1.55135e-31	8.63563e-30	-0.907973
Rv2991	629.031	0.222815	0.0609422	3.65618	0.000256006	0.000534162	0.192649
Rv2993c	1936.31	0.126928	0.0569302	2.22955	0.0257775	0.0258045	0.110186
Rv2994	1762.96	0.163435	0.0719117	2.27272	0.0230429	0.0236286	0.132511
Rv2997	656.814	0.0216823	0.0851879	0.254523	0.799091	0.340856	0.0159726
Rv2998	494.221	-0.129735	0.136896	-0.947688	0.343289	0.192537	-0.0710327
Rv2998A	58.6246	-0.268172	0.418522	-0.640761	0.521678	0.256338	-0.0422259
Rv3000	627.682	0.0962798	0.0678408	1.4192	0.155841	0.108582	0.0787159
Rv3005c	6745.02	0.0932021	0.0643892	1.44748	0.147763	0.104495	0.0775142
Rv3007c	2430.05	0.0598905	0.0533593	1.1224	0.261692	0.160205	0.0521096
Rv3008	1497.29	0.0364968	0.0485341	0.751983	0.452061	0.23277	0.0322034
Rv3013	252.02	-0.0372843	0.104169	-0.357922	0.720402	0.318379	-0.0246176
Rv3015c	291.445	0.177565	0.0917165	1.93603	0.0528646	0.0462641	0.129373
Rv3023c	15954.1	-0.239112	0.0903438	-2.64669	0.00812842	0.010103	-0.178839
Rv3026c	209.6	0.0527425	0.140493	0.37541	0.707355	0.314294	0.0279477
Rv3027c	588.594	0.443396	0.134466	3.29745	0.000975684	0.00169914	0.29862
Rv3030	1332.55	0.0243459	0.0744623	0.326956	0.743701	0.325149	0.0190125
Rv3031	1323.69	0.171822	0.0775322	2.21613	0.0266824	0.0265738	0.135424
Rv3032	890.684	0.245499	0.0570069	4.30648	1.65874e-05	4.59213e-05	0.216821
Rv3032A	437.441	0.06783	0.0768147	0.883034	0.377218	0.206302	0.0525879
Rv3033	512.206	-0.161259	0.0802588	-2.00924	0.044512	0.0402423	-0.124922
Rv3034c	2266.86	-0.0479398	0.0556009	-0.862214	0.38857	0.209809	-0.0411721
Rv3035	1543.69	0.190421	0.062473	3.04806	0.00230327	0.00351862	0.162584
Rv3037c	573.204	0.305639	0.0886605	3.4473	0.000566228	0.00107235	0.237221
Rv3038c	3801.82	0.15349	0.0401058	3.82712	0.00012965	0.000294395	0.143014
Rv3040c	777.781	-0.0454905	0.0822505	-0.553073	0.580213	0.275713	-0.0341283
Rv3041c	1078.92	-0.00987765	0.0609686	-0.162012	0.871296	0.360567	-0.00823513
Rv3046c	1657.48	0.185004	0.0697974	2.65058	0.00803534	0.01003	0.152273
Rv3047c	918.336	-0.35874	0.11618	-3.0878	0.00201642	0.003146	-0.247379
Rv3049c	10841.8	-0.0452388	0.0576084	-0.785281	0.432289	0.225495	-0.0384787
Rv3050c	12557.1	0.105299	0.0732392	1.43774	0.150507	0.105955	0.0838107
Rv3054c	208.823	0.427344	0.235221	1.81677	0.0692516	0.0578134	0.154244
Rv3055	392.802	0.103806	0.0883651	1.17474	0.240099	0.149954	0.0758792
Rv3057c	3504.99	0.00760167	0.0533184	0.142571	0.886629	0.363342	0.00654914
Rv3058c	4092.36	-0.265908	0.0514514	-5.16814	2.36432e-07	9.49769e-07	-0.240983
Rv3060c	4722.19	-0.743891	0.112917	-6.58797	4.45878e-11	3.40666e-10	-0.705826
Rv3064c	683.44	-0.0763138	0.0786257	-0.970596	0.33175	0.187891	-0.0586632
Rv3066	495.462	0.100429	0.0716683	1.4013	0.161124	0.111515	0.0805341
Rv3067	799.903	0.168483	0.0742226	2.26997	0.0232095	0.0237681	0.135082
Rv3069	473.464	-0.131636	0.0862801	-1.52568	0.127089	0.0931288	-0.0979264
Rv3070	301.816	-0.169269	0.104344	-1.62223	0.104755	0.0802451	-0.114175
Rv3071	765.485	-0.226315	0.0855003	-2.64695	0.00812206	0.010103	-0.173155
Rv3072c	404.177	0.118852	0.0808564	1.46992	0.141584	0.101016	0.0909501
Rv3073c	209.998	-0.127407	0.104343	-1.22105	0.222069	0.141332	-0.0850955
Rv3074	1193.8	0.514152	0.0501523	10.2518	1.16128e-24	3.85107e-23	0.500922
Rv3075c	3364.28	0.251587	0.0746459	3.3704	0.000750582	0.00136828	0.205327
Rv3076	335.716	-0.305931	0.0967514	-3.16204	0.0015667	0.00255697	-0.227358
Rv3077	1199.92	-0.0753987	0.082681	-0.911924	0.361809	0.200472	-0.0566573
Rv3079c	932.984	-0.0388038	0.0924196	-0.419865	0.674584	0.30472	-0.0274621
Rv3081	1831.61	-0.103039	0.0596232	-1.72816	0.0839593	0.067281	-0.0879286
Rv3083	3321.64	-0.175807	0.0618548	-2.84226	0.00447954	0.00617871	-0.1502
Rv3085	494.77	-0.205153	0.105654	-1.94174	0.0521686	0.0458352	-0.13875
Rv3087	1651.2	0.0987732	0.0658714	1.49949	0.133748	0.0968987	0.081622
Rv3090	596.29	-0.295887	0.122352	-2.41834	0.0155917	0.0172475	-0.18837
Rv3091	1367.53	0.13161	0.0651732	2.01938	0.0434472	0.0394628	0.109837
Rv3092c	2145.86	0.0488037	0.0677294	0.720569	0.471175	0.239292	0.0395653
Rv3093c	247.078	0.0464012	0.100641	0.461055	0.644759	0.295484	0.0313103
Rv3094c	132.482	0.0127167	0.226232	0.056211	0.955174	0.380466	0.00414589
Rv3095	691.677	-0.22883	0.0929629	-2.46152	0.013835	0.0156279	-0.168045
Rv3096	2091.98	0.060008	0.057551	1.04269	0.297091	0.175068	0.051224
Rv3098A	2076.9	-0.252435	0.0690056	-3.65818	0.000254015	0.000532144	-0.211772
Rv3098c	2882.18	0.23758	0.494314	0.480625	0.630783	0.291133	0.0300288
Rv3099c	3163.36	0.0503525	0.0461562	1.09091	0.275311	0.166579	0.0450458
Rv3103c	527.293	0.176907	0.0862976	2.04996	0.0403679	0.0372962	0.132952
Rv3104c	2856.25	0.115439	0.0604075	1.91101	0.0560035	0.0484938	0.0983674
Rv3108	505.489	-0.118789	0.098877	-1.20138	0.229605	0.14518	-0.081848
Rv3113	199.295	-0.0800933	0.213917	-0.374413	0.708097	0.314434	-0.0279458
Rv3114	322.513	-0.344286	0.13932	-2.47119	0.0134665	0.0153095	-0.204253
Rv3115	15954.1	-0.239112	0.0903438	-2.64669	0.00812842	0.010103	-0.178839
Rv3120	1957.64	-0.111105	0.0581379	-1.91107	0.0559961	0.0484938	-0.0956436
Rv3122	336.45	0.166173	0.182701	0.909536	0.363067	0.201026	0.069875
Rv3123	556.697	0.262114	0.0687875	3.81049	0.00013869	0.000313285	0.220719
Rv3126c	191.789	-0.287695	0.155329	-1.85217	0.0640017	0.0542582	-0.149104
Rv3127	17128.4	-1.25973	0.187338	-6.72434	1.76384e-11	1.42445e-10	-1.20737
Rv3128c	12264.8	-2.16784	0.362361	-5.98253	2.19701e-09	1.27773e-08	-1.94537
Rv3129	5078.63	-2.5104	0.363749	-6.90147	5.1467e-12	4.48145e-11	-2.25409
Rv3131	24034.7	-1.19635	0.128643	-9.29982	1.40688e-20	3.17799e-19	-1.17205
Rv3134c	9747.03	-1.73477	0.152836	-11.3505	7.37017e-30	3.82913e-28	-1.70035
Rv3136A	2568.8	0.646899	0.0884226	7.31599	2.55482e-13	2.70886e-12	0.618824
Rv3137	1050.38	0.688271	0.0559968	12.2913	1.00916e-34	7.14956e-33	0.679174
Rv3142c	3153.98	-0.124337	0.0553762	-2.24531	0.0247483	0.025064	-0.108672
Rv3143	2711.67	-0.0279578	0.0693233	-0.403296	0.686731	0.308796	-0.0224238
Rv3160c	15168.4	-0.442178	0.0572386	-7.72517	1.11702e-14	1.36017e-13	-0.417189
Rv3161c	56785.6	-0.470413	0.0894685	-5.25786	1.45739e-07	6.07364e-07	-0.409579
Rv3162c	636.231	-0.0415268	0.137748	-0.301469	0.763057	0.329975	-0.0223575
Rv3163c	926.88	-0.166745	0.0558089	-2.98779	0.00281002	0.00416109	-0.14626
Rv3165c	371.662	-0.567773	0.122803	-4.62343	3.77451e-06	1.18372e-05	-0.474571
Rv3166c	720.987	-0.302916	0.0780468	-3.88121	0.00010394	0.000241797	-0.247736
Rv3167c	116.571	-0.705808	0.193428	-3.64895	0.000263318	0.000548683	-0.496313
Rv3168	1670.24	-0.568948	0.0926844	-6.13854	8.32812e-10	5.24205e-09	-0.525043
Rv3169	1435.36	-0.710536	0.0662012	-10.733	7.1261e-27	3.08527e-25	-0.698164
Rv3172c	643.794	-0.178896	0.0774487	-2.30987	0.0208953	0.0219906	-0.141282
Rv3173c	2547.84	0.0318348	0.0993586	0.320403	0.748663	0.326585	0.0216225
Rv3174	175.131	-0.299249	0.188156	-1.59043	0.111738	0.084221	-0.128482
Rv3175	791.846	-0.0358465	0.0804704	-0.445462	0.655986	0.298959	-0.0271323
Rv3177	490.355	-0.0741589	0.111712	-0.663842	0.506792	0.250762	-0.0469497
Rv3178	109.338	-0.27155	0.221384	-1.2266	0.219972	0.140399	-0.0956984
Rv3179	1051.18	-0.148071	0.0636914	-2.32482	0.0200815	0.0213068	-0.124847
Rv3180c	222.756	0.126304	0.123498	1.02272	0.306439	0.178813	0.075027
Rv3181c	212.678	0.0922401	0.12633	0.73015	0.465299	0.237254	0.0535323
Rv3182	349.441	-0.193433	0.103902	-1.86168	0.0626487	0.0533566	-0.13172
Rv3183	107.22	-0.513554	0.401032	-1.28058	0.200341	0.131921	-0.0943344
Rv3184	1506.47	-0.278269	0.323879	-0.859176	0.390244	0.209809	-0.0612725
Rv3185	7013.12	-0.0585981	0.0827741	-0.707928	0.47899	0.241452	-0.0439028
Rv3186	1506.47	-0.278269	0.323879	-0.859176	0.390244	0.209809	-0.0612725
Rv3187	7011.49	-0.0589015	0.0827682	-0.711645	0.476685	0.240842	-0.0441333
Rv3188	641.304	1.08117	0.0855645	12.6358	1.34095e-36	1.04502e-34	1.0693
Rv3189	1189.67	0.840022	0.0742805	11.3088	1.18734e-29	5.78322e-28	0.827222
Rv3190A	3033.07	-0.0414284	0.0582181	-0.711607	0.476708	0.240842	-0.0351128
Rv3190c	2176.44	0.0317791	0.0427212	0.743872	0.456954	0.23413	0.0286184
Rv3191c	3778.46	0.128231	0.0622063	2.06138	0.0392671	0.0364086	0.108552
Rv3192	199.696	0.265252	0.115481	2.29692	0.0216233	0.022575	0.173181
Rv3193c	12277.2	-0.0224417	0.0381699	-0.587942	0.556572	0.268739	-0.0204448
Rv3194c	1841.04	-0.0716591	0.079743	-0.898625	0.368852	0.20286	-0.0547046
Rv3195	503.679	0.213934	0.102091	2.09551	0.0361254	0.0341456	0.148226
Rv3196	638.013	-0.0336005	0.0793707	-0.423336	0.67205	0.304036	-0.0255802
Rv3196A	481.213	-0.252394	0.0952255	-2.65049	0.00803748	0.01003	-0.184549
Rv3197	14993.7	-0.101983	0.0432783	-2.35644	0.0184512	0.0199021	-0.0935536
Rv3198A	833.779	0.119395	0.0806311	1.48075	0.138672	0.0995112	0.0914911
Rv3200c	3129.14	0.0596249	0.0419449	1.42151	0.15517	0.108211	0.0544199
Rv3201c	455.163	0.0759985	0.144469	0.526054	0.598851	0.281395	0.0393986
Rv3202c	412.252	0.114332	0.139738	0.818187	0.41325	0.218711	0.0613421
Rv3204	975.243	0.169177	0.0908213	1.86274	0.0624987	0.0532891	0.123641
Rv3205c	4013.41	0.154829	0.0586764	2.63869	0.00832282	0.0102872	0.133853
Rv3207c	5255.24	-0.0811524	0.035503	-2.28579	0.0222666	0.022999	-0.0763648
Rv3208	2509.1	0.0161798	0.0610899	0.264852	0.791124	0.338569	0.0134873
Rv3209	2108.43	0.271224	0.0484478	5.59828	2.16489e-08	1.06443e-07	0.248715
Rv3210c	2231.81	0.0575847	0.0647444	0.889415	0.37378	0.205208	0.0474589
Rv3212	6381.2	0.122428	0.0755012	1.62154	0.104902	0.0802597	0.0965817
Rv3213c	6100.69	0.0629471	0.0442934	1.42114	0.155276	0.108237	0.0569805
Rv3216	1058.99	0.0371815	0.0596791	0.623024	0.533269	0.260391	0.0312788
Rv3217c	465.03	0.24995	0.0711563	3.5127	0.000443585	0.000864231	0.207408
Rv3218	1271.15	-0.0919648	0.0534138	-1.72174	0.0851163	0.0680682	-0.0806331
Rv3220c	7367.8	0.175076	0.0411241	4.25725	2.06952e-05	5.6392e-05	0.162776
Rv3222c	1791.66	0.0414451	0.0545064	0.760371	0.447033	0.230944	0.0357136
Rv3224	3559.92	0.195377	0.0625357	3.12425	0.00178259	0.00282072	0.166902
Rv3224A	235.038	0.375595	0.16419	2.28756	0.0221633	0.0229226	0.196281
Rv3224B	356.118	0.386002	0.147661	2.61412	0.00894584	0.0109102	0.225474
Rv3225c	2408.21	0.0552098	0.053615	1.02975	0.30313	0.177153	0.0479234
Rv3226c	553.491	0.118486	0.0670149	1.76806	0.0770511	0.0628766	0.0977173
Rv3228	3101.44	0.138618	0.0660254	2.09947	0.0357755	0.0338972	0.115332
Rv3230c	10139.9	-0.506294	0.0951893	-5.31881	1.04448e-07	4.50958e-07	-0.4445
Rv3231c	1431.56	0.0150108	0.0571747	0.262543	0.792903	0.339156	0.0127319
Rv3233c	1461.05	-0.023704	0.0612898	-0.386753	0.698939	0.312272	-0.0197555
Rv3235	1117.73	-0.00510174	0.0613827	-0.0831136	0.933761	0.374521	-0.00424461
Rv3236c	2551.27	-0.209785	0.0345721	-6.06805	1.29475e-09	7.94501e-09	-0.199538
Rv3237c	1311.61	-0.365232	0.04876	-7.49041	6.86612e-14	7.75489e-13	-0.342581
Rv3238c	1413.86	-0.0710971	0.0545654	-1.30297	0.192585	0.128113	-0.0617016
Rv3239c	3075.06	0.0050817	0.0387116	0.131271	0.895561	0.364737	0.00460312
Rv3241c	9664.52	-0.0831509	0.0530644	-1.56698	0.117119	0.0873423	-0.0728761
Rv3242c	291.723	0.190218	0.0911999	2.08573	0.037003	0.0348483	0.139475
Rv3243c	1349.98	0.127555	0.0472563	2.69922	0.00695022	0.00891591	0.115519
Rv3249c	3180.42	-0.466565	0.122999	-3.79325	0.000148686	0.000332015	-0.345335
Rv3253c	1219.41	-0.188828	0.0522834	-3.61162	0.000304287	0.000626515	-0.168564
Rv3254	2782.53	-0.127342	0.0401318	-3.17309	0.00150825	0.00246933	-0.118468
Rv3256c	1317.63	0.243824	0.0815182	2.99104	0.00278033	0.00412322	0.191639
Rv3258c	1008.31	0.360421	0.107769	3.34439	0.00082463	0.00148589	0.261136
Rv3259	2323.95	0.317834	0.104314	3.0469	0.00231212	0.00352271	0.227975
Rv3263	1355.22	0.0965261	0.0757307	1.2746	0.202452	0.132862	0.0756656
Rv3267	4419.62	-0.0527928	0.0477803	-1.10491	0.2692	0.163708	-0.0469541
Rv3268	2487.57	0.177178	0.07074	2.50464	0.0122576	0.0141101	0.144914
Rv3269	4195.37	-0.282361	0.143474	-1.96803	0.0490648	0.0435501	-0.156833
Rv3271c	3587.8	-0.460335	0.0806096	-5.71067	1.12533e-08	5.84658e-08	-0.410581
Rv3272	2417.07	-0.0557075	0.0455631	-1.22264	0.221464	0.141063	-0.0500462
Rv3277	2184.64	0.0257284	0.0499958	0.514612	0.606824	0.283797	0.022513
Rv3278c	2456.61	0.0845565	0.0624315	1.35439	0.175612	0.119214	0.0708895
Rv3282	1408.4	0.383816	0.0900443	4.26252	2.02132e-05	5.52718e-05	0.310746
Rv3284	2625.46	0.123698	0.0538542	2.2969	0.0216244	0.022575	0.108854
Rv3289c	3212.71	-1.15659	0.125064	-9.24801	2.28717e-20	5.09266e-19	-1.1327
Rv3292	1192.89	-0.132667	0.0587057	-2.25987	0.0238296	0.0242914	-0.114311
Rv3294c	413.777	-0.0749764	0.213107	-0.351825	0.724969	0.31974	-0.0262585
Rv3295	7251.44	-0.073727	0.0515414	-1.43044	0.15259	0.106987	-0.0649101
Rv3300c	915.162	0.00806292	0.0634309	0.127113	0.898851	0.365695	0.00664563
Rv3304	765.45	0.0465064	0.0636088	0.731131	0.464699	0.237085	0.0384648
Rv3311	3494.55	0.0691406	0.0416765	1.65899	0.0971187	0.075621	0.0633744
Rv3312A	2609.28	-0.168096	0.058348	-2.88092	0.00396516	0.00555775	-0.145803
Rv3312c	1518.33	0.0641722	0.0528161	1.21501	0.224361	0.142327	0.0560345
Rv3322c	344.451	0.0981628	0.0912045	1.07629	0.281796	0.169255	0.0705072
Rv3324A	45.1569	-0.180034	0.248516	-0.724436	0.468798	0.238318	-0.0536706
Rv3325	1506.47	-0.278269	0.323879	-0.859176	0.390244	0.209809	-0.0612725
Rv3326	7021.17	-0.0611753	0.0837984	-0.730029	0.465372	0.237254	-0.0455867
Rv3327	1641	0.0692187	0.152828	0.452919	0.650607	0.29729	0.0340936
Rv3329	1977.11	-0.0252224	0.041643	-0.60568	0.544727	0.264466	-0.0227482
Rv3333c	173.494	0.0133208	0.142125	0.093726	0.925327	0.372	0.00697529
Rv3334	1748.44	-0.393668	0.0990968	-3.97256	7.11031e-05	0.000172086	-0.307108
Rv3335c	1668.18	0.0133983	0.0584454	0.229245	0.818678	0.346179	0.0112998
Rv3337	355.606	-0.138226	0.0999083	-1.38353	0.166502	0.114274	-0.095039
Rv3338	1110.89	-0.0110539	0.1008	-0.109661	0.912678	0.369181	-0.00743787
Rv3342	1178.77	-0.630237	0.0501774	-12.5602	3.4954e-36	2.5943e-34	-0.621928
Rv3346c	624.656	0.0269009	0.16322	0.164814	0.86909	0.360072	0.0124184
Rv3348	1247.99	0.0164259	0.0541224	0.303496	0.761512	0.329882	0.0141155
Rv3349c	244.092	-0.00123667	0.144123	-0.00858066	0.993154	0.389522	-0.000639688
Rv3351c	193.097	0.0193317	0.155125	0.12462	0.900824	0.366306	0.00936138
Rv3352c	79.2775	0.486487	0.204704	2.37654	0.0174758	0.0190719	0.222902
Rv3353c	72.5023	0.0420463	0.233143	0.180346	0.856881	0.356435	0.0132519
Rv3354	594.124	0.0263135	0.0825891	0.318607	0.750024	0.326813	0.0196716
Rv3355c	763.537	0.110923	0.136941	0.810007	0.417936	0.220517	0.0605026
Rv3359	631.888	0.00482403	0.0628088	0.0768051	0.938779	0.375856	0.00398725
Rv3360	426.697	0.317415	0.0809468	3.92128	8.80791e-05	0.000207063	0.257701
Rv3361c	798.449	0.329602	0.0598141	5.51044	3.57928e-08	1.68695e-07	0.294766
Rv3362c	1186.96	0.0413062	0.0544883	0.758075	0.448406	0.231576	0.0355956
Rv3363c	318.635	0.086443	0.0829608	1.04197	0.297423	0.175132	0.0649721
Rv3364c	328.843	0.137347	0.103696	1.32452	0.185331	0.12423	0.092289
Rv3365c	4902.23	0.126845	0.0505115	2.51121	0.0120317	0.0139117	0.113322
Rv3368c	217.895	-0.0575661	0.124062	-0.46401	0.642641	0.29523	-0.0337382
Rv3369	306.676	0.185367	0.100238	1.84927	0.0644184	0.0544326	0.128719
Rv3371	1906.55	-0.0916541	0.0572386	-1.60126	0.109318	0.082873	-0.0789311
Rv3376	5929.45	0.0354604	0.0421462	0.841367	0.400143	0.213587	0.0320413
Rv3377c	4938.59	0.0276687	0.0573352	0.482579	0.629395	0.290751	0.0234873
Rv3378c	862.141	-0.329146	0.0617061	-5.33409	9.60265e-08	4.20421e-07	-0.292216
Rv3380c	7012.01	-0.0589165	0.082745	-0.712025	0.47645	0.240842	-0.0441503
Rv3381c	1506.47	-0.278269	0.323879	-0.859176	0.390244	0.209809	-0.0612725
Rv3386	228.814	-0.0853092	0.167819	-0.508339	0.611215	0.285057	-0.0385122
Rv3387	278.879	0.04764	0.158629	0.300323	0.763931	0.330013	0.0226238
Rv3394c	185.599	0.0953998	0.115839	0.823552	0.410194	0.217611	0.0590694
Rv3395A	437.25	0.337601	0.0958512	3.52214	0.000428079	0.00083716	0.256899
Rv3395c	249.72	0.0649825	0.169905	0.382465	0.702117	0.313206	0.0289165
Rv3399	392.909	-0.179972	0.105601	-1.70426	0.0883327	0.0701723	-0.120831
Rv3400	1162.81	0.177451	0.0672748	2.6377	0.00834715	0.0103091	0.147712
Rv3401	2919.86	0.128514	0.0434737	2.95614	0.00311521	0.00454113	0.118128
Rv3402c	876.32	-0.389871	0.118863	-3.28001	0.00103804	0.00178776	-0.271937
Rv3403c	2093.27	0.0330992	0.0687006	0.48179	0.629955	0.290924	0.0266452
Rv3404c	2184.13	0.0464363	0.046824	0.991719	0.321334	0.18393	0.0413776
Rv3405c	836.447	0.0351644	0.0723943	0.485735	0.627155	0.289983	0.0277856
Rv3406	360.913	-0.239025	0.1015	-2.35493	0.0185262	0.0199554	-0.167685
Rv3412	7826.48	-0.0811582	0.0579473	-1.40055	0.161348	0.111571	-0.0694929
Rv3413c	5432.88	0.0328115	0.0670984	0.489006	0.624837	0.28959	0.0266244
Rv3415c	121.188	0.321458	0.148224	2.16873	0.0301032	0.0294907	0.177634
Rv3421c	520.31	0.269718	0.104904	2.5711	0.0101376	0.0120709	0.187903
Rv3422c	443.179	0.163492	0.0777463	2.10289	0.0354754	0.0336947	0.128479
Rv3424c	1911.56	-0.137197	0.0716088	-1.91593	0.0553745	0.0480827	-0.110853
Rv3427c	617.478	-0.0421171	0.205412	-0.205038	0.837543	0.351014	-0.0153285
Rv3428c	144.565	-0.642763	0.674307	-0.95322	0.340478	0.191468	-0.0603382
Rv3430c	1528.53	0.130317	0.0747287	1.74387	0.0811817	0.0655268	0.103402
Rv3431c	3305.86	0.218207	0.0741895	2.94121	0.00326933	0.00471385	0.176894
Rv3433c	347.72	0.29694	0.113702	2.61155	0.00901321	0.0109666	0.199206
Rv3434c	1442.15	-0.0165036	0.0639773	-0.257961	0.796437	0.340268	-0.0135739
Rv3435c	3758.97	0.167758	0.0505647	3.3177	0.000907631	0.00159849	0.150474
Rv3437	590.66	-0.0192071	0.085661	-0.224223	0.822584	0.346984	-0.0141101
Rv3438	1243.47	0.0684109	0.0780505	0.876496	0.380761	0.207281	0.0526867
Rv3439c	610.78	0.25389	0.060134	4.22208	2.42062e-05	6.49373e-05	0.221716
Rv3440c	224.738	0.270448	0.109146	2.47784	0.0132179	0.0150708	0.183833
Rv3446c	65.5989	-0.185637	0.412752	-0.449755	0.652887	0.29807	-0.0292727
Rv3453	231.547	-0.111277	0.139853	-0.79567	0.426224	0.223453	-0.0596294
Rv3454	799.413	0.204263	0.0877676	2.32732	0.0199483	0.0211943	0.153332
Rv3463	737.002	-0.250479	0.107642	-2.32697	0.019967	0.0211998	-0.170248
Rv3466	1017.18	0.0577988	0.130523	0.442823	0.657894	0.299478	0.032562
Rv3467	3513.28	-0.66015	0.361409	-1.8266	0.0677602	0.0569118	-0.15945
Rv3468c	369.868	-0.107124	0.170394	-0.628685	0.529555	0.25922	-0.0477838
Rv3471c	60.1152	-0.273446	0.269937	-1.013	0.311061	0.1801	-0.0758055
Rv3472	433.383	-0.341412	0.0846888	-4.03138	5.54514e-05	0.000136538	-0.275733
Rv3474	1506.47	-0.278269	0.323879	-0.859176	0.390244	0.209809	-0.0612725
Rv3475	7024.02	-0.060622	0.0836438	-0.724764	0.468597	0.238294	-0.0452104
Rv3479	17715.3	-0.159274	0.0421695	-3.777	0.000158727	0.000351415	-0.147398
Rv3480c	5448.79	-0.0485353	0.0369364	-1.31402	0.188839	0.125998	-0.0449342
Rv3481c	398.759	0.22547	0.084135	2.67986	0.00736532	0.00932586	0.173759
Rv3482c	1968.78	0.0678823	0.0484792	1.40024	0.161442	0.111587	0.0604742
Rv3483c	1142.61	0.0792689	0.0538054	1.47325	0.140683	0.100538	0.0691741
Rv3485c	2366.31	0.28626	0.0672346	4.25763	2.06609e-05	5.6392e-05	0.24459
Rv3486	5577.08	0.0887409	0.0523983	1.69358	0.0903446	0.0714429	0.0781121
Rv3488	210.471	0.406942	0.143627	2.83332	0.00460675	0.00629845	0.248811
Rv3489	1584.33	0.0615523	0.149113	0.412791	0.67976	0.306212	0.0309799
Rv3491	5362.27	-0.237098	0.0561142	-4.22528	2.38649e-05	6.43539e-05	-0.209832
Rv3492c	2830.36	0.0028667	0.0524207	0.0546864	0.956388	0.380658	0.00247822
Rv3493c	1721.77	-0.0727839	0.0733315	-0.992534	0.320937	0.18377	-0.0575459
Rv3502c	962.414	-0.360074	0.0697294	-5.16387	2.41898e-07	9.69228e-07	-0.314105
Rv3510c	865.544	0.100024	0.06726	1.48712	0.136983	0.0987079	0.0820862
Rv3517	260.808	0.141377	0.153867	0.918823	0.358188	0.198999	0.0700015
[truncated: 1,986 more rows]

## Sheet: KO_minus_C_at_WCL
Gene	baseMean	logFC	logFC_SE	stat	p	fdr	logFC_shrunken
35kd_ag	9304.24	-0.173032	0.0734851	-2.35466	0.0185396	0.0152766	-0.150738
PE1	1335.56	-0.166404	0.112893	-1.47399	0.140484	0.0813098	-0.123846
PE10	50.9009	-0.0905651	0.490083	-0.184795	0.85339	0.324422	-0.0146834
PE12	7432.19	-0.164912	0.0568613	-2.90025	0.00372867	0.00397166	-0.151357
PE13	6528.2	-0.474572	0.0963041	-4.92784	8.31416e-07	2.3357e-06	-0.402207
PE14	286.327	0.16178	0.0888085	1.82167	0.0685052	0.0451431	0.133055
PE15	498.445	-0.0404927	0.10347	-0.391349	0.695539	0.280076	-0.0311276
PE16	1706.88	-0.0977232	0.0559331	-1.74715	0.0806121	0.0517027	-0.0896746
PE17	3346.52	-0.0400978	0.0631932	-0.634527	0.525737	0.228698	-0.0359361
PE18	263.038	0.0031795	0.112099	0.0283634	0.977372	0.356557	0.00235287
PE19	3558.19	-0.0170171	0.0580335	-0.293229	0.769347	0.302115	-0.0154946
PE2	631.553	0.058637	0.168171	0.348674	0.727334	0.289802	0.0334654
PE20	60.3769	-1.1168	0.301004	-3.71023	0.000207067	0.000322268	-0.70898
PE21	72.5564	0.224253	0.226491	0.990118	0.322116	0.15599	0.0987169
PE22	106.093	-0.506911	0.266482	-1.90223	0.057141	0.0388444	-0.200359
PE23	1476.53	-0.253933	0.0571962	-4.43968	9.00922e-06	1.99752e-05	-0.234208
PE24	102.935	0.0421213	0.153396	0.274591	0.78363	0.305648	0.0257753
PE25	4327.36	-0.101444	0.0571522	-1.77497	0.0759025	0.0491856	-0.0927687
PE26	3551.57	-0.0820995	0.0338004	-2.42895	0.0151427	0.0129357	-0.0794525
PE27	200.828	0.0750447	0.131353	0.571321	0.567782	0.242898	0.0509957
PE3	1425.59	-0.198361	0.106884	-1.85586	0.0634733	0.0424254	-0.152101
PE31	75994.7	-0.20754	1.00696	-0.206105	0.836709	0.319962	-0.0120686
PE33	74.4749	0.079932	0.183214	0.436278	0.662635	0.270837	0.0425066
PE34	138.171	0.314329	0.197245	1.5936	0.111026	0.0669487	0.161587
PE35	3702.21	-0.00513193	0.0412787	-0.124324	0.901059	0.337733	-0.00488642
PE36	891.579	0.0596255	0.0706564	0.84388	0.398737	0.18573	0.0521425
PE5	553.36	0.435787	0.106347	4.09778	4.17134e-05	7.78708e-05	0.351951
PE6	350.54	0.38739	0.0881623	4.39405	1.11257e-05	2.42206e-05	0.330279
PE7	178.09	0.0220406	0.118695	0.185691	0.852687	0.324326	0.0158401
PE8	67.3151	0.418842	0.353965	1.18329	0.236695	0.124179	0.111236
PE_PGRS1	407.559	0.438192	0.123019	3.56199	0.000368055	0.000535249	0.331124
PE_PGRS10	287.614	0.44115	0.172142	2.56271	0.0103859	0.00946134	0.266458
PE_PGRS11	793.447	-0.0783315	0.0764426	-1.02471	0.3055	0.150185	-0.0671486
PE_PGRS12	394.446	0.21863	0.100722	2.17064	0.0299587	0.0227599	0.172496
PE_PGRS13	1135.4	0.469134	0.0948686	4.9451	7.61058e-07	2.15485e-06	0.398892
PE_PGRS14	1123.18	0.294846	0.0984535	2.99478	0.00274643	0.00307066	0.237596
PE_PGRS15	3072.51	0.398462	0.0933735	4.2674	1.97764e-05	3.99737e-05	0.334349
PE_PGRS16	1397.41	0.0452064	0.0662723	0.682132	0.495156	0.21883	0.0401124
PE_PGRS17	309.885	0.131791	0.107693	1.22376	0.221043	0.117855	0.0999911
PE_PGRS18	2862.26	-0.000349549	0.0555706	-0.00629018	0.994981	0.360377	-0.0003206
PE_PGRS19	141.433	0.367474	0.165127	2.2254	0.0260546	0.020275	0.223648
PE_PGRS2	114.65	0.639654	0.269215	2.376	0.0175015	0.0145292	0.268018
PE_PGRS20	79.1688	0.282006	0.315927	0.89263	0.372055	0.175802	0.0848092
PE_PGRS21	505.851	0.306603	0.0826946	3.70766	0.000209185	0.000324862	0.26262
PE_PGRS22	305.969	0.577679	0.127853	4.51829	6.23405e-06	1.41933e-05	0.45597
PE_PGRS23	142.351	0.3835	0.228242	1.68024	0.0929109	0.0579657	0.173323
PE_PGRS24	276.852	0.0690729	0.0915583	0.754415	0.4506	0.203508	0.0558492
PE_PGRS25	1570.58	-0.622339	0.133303	-4.66861	3.03247e-06	7.44517e-06	-0.494194
PE_PGRS26	152.135	0.15959	0.128366	1.24324	0.213779	0.114917	0.110715
PE_PGRS27	168.432	0.873837	0.292449	2.988	0.00280806	0.00312985	0.405619
PE_PGRS28	223.385	0.658071	0.239646	2.74601	0.00603252	0.00602071	0.323776
PE_PGRS29	296.679	0.400953	0.143502	2.79406	0.00520515	0.00531646	0.273132
PE_PGRS3	317.444	0.336764	0.0995956	3.38131	0.000721399	0.000961433	0.272337
PE_PGRS30	1294.72	0.286901	0.0774235	3.7056	0.00021089	0.000326806	0.249554
PE_PGRS31	1220.58	0.294382	0.0699343	4.20941	2.56036e-05	5.0203e-05	0.262619
PE_PGRS32	929.723	0.372717	0.19432	1.91806	0.055103	0.0377618	0.197412
PE_PGRS33	1159.64	0.292941	0.0867754	3.37586	0.000735856	0.000974692	0.246754
PE_PGRS34	284.722	0.320941	0.0972239	3.30105	0.000963249	0.00123616	0.261132
PE_PGRS35	1968.46	-0.0119647	0.0752341	-0.159033	0.873643	0.330465	-0.0102866
PE_PGRS36	113.797	1.50248	0.429784	3.49588	0.000472499	0.000665643	0.869605
PE_PGRS37	155.579	0.705238	0.122268	5.76796	8.02363e-09	3.36147e-08	0.612991
PE_PGRS38	4746.28	0.404759	0.0780434	5.18634	2.1447e-07	6.70475e-07	0.357924
PE_PGRS39	2159.94	0.363131	0.0717555	5.06067	4.17789e-07	1.23611e-06	0.325068
PE_PGRS4	192.954	0.268858	0.118072	2.27707	0.0227819	0.0181296	0.198577
PE_PGRS40	50.709	0.679047	0.275818	2.46193	0.013819	0.0119757	0.283285
PE_PGRS41	11246.4	0.187854	0.0814731	2.30572	0.0211262	0.0169524	0.159253
PE_PGRS42	188.284	1.32398	0.598758	2.21121	0.0270216	0.0209033	0.247217
PE_PGRS43	322.946	1.40201	0.456169	3.07344	0.00211607	0.00244361	0.581111
PE_PGRS44	1922.53	-0.248688	0.0995078	-2.49918	0.0124482	0.0110264	-0.198041
PE_PGRS45	365.326	0.836647	0.141536	5.91121	3.39606e-09	1.48763e-08	0.746287
PE_PGRS46	771.763	0.55081	0.32015	1.72047	0.0853464	0.0541846	0.174723
PE_PGRS47	621.915	0.40654	0.0925353	4.39335	1.11619e-05	2.42262e-05	0.342791
PE_PGRS48	505.325	0.262659	0.0941093	2.791	0.00525456	0.00535554	0.214178
PE_PGRS5	2372.29	0.439326	0.114174	3.84786	0.000119155	0.000195623	0.344449
PE_PGRS50	106.085	1.09071	0.3534	3.08632	0.00202651	0.00235908	0.488579
PE_PGRS51	858.596	0.233852	0.0610223	3.83224	0.000126983	0.000207705	0.213037
PE_PGRS52	72.5832	0.704704	0.197235	3.57292	0.000353023	0.000517566	0.449329
PE_PGRS53	710.583	0.558375	0.0926935	6.02388	1.70282e-09	7.89086e-09	0.492228
PE_PGRS54	1259.04	0.221565	0.0817117	2.71154	0.0066971	0.00657472	0.188324
PE_PGRS55	321.702	0.198379	0.0992252	1.99928	0.0455775	0.0323413	0.157079
PE_PGRS56	35.9055	1.66845	0.436338	3.82376	0.000131433	0.00021379	1.18846
PE_PGRS57	1018.41	0.144428	0.0686783	2.10297	0.0354687	0.0261748	0.127634
PE_PGRS58	171.943	0.757055	0.200423	3.77728	0.00015855	0.000251928	0.501517
PE_PGRS59	910.053	-0.116357	0.102608	-1.13399	0.256797	0.132041	-0.0901138
PE_PGRS6	525.56	0.956511	0.367297	2.60419	0.00920929	0.00854735	0.329924
PE_PGRS60	108.416	0.323098	0.150609	2.14528	0.0319305	0.024006	0.208094
PE_PGRS61	41.7589	0.585327	0.234979	2.49098	0.0127391	0.0112083	0.280024
PE_PGRS62	1856.04	-0.060292	0.113429	-0.531538	0.595046	0.250719	-0.0444086
PE_PGRS7	5346.6	0.164691	0.0837079	1.96744	0.049132	0.034356	0.138165
PE_PGRS8	206.803	0.0850514	0.125609	0.677112	0.498335	0.219898	0.059375
PE_PGRS9	107.28	1.20477	0.347507	3.46689	0.000526522	0.000728924	0.676961
PPE1	152.058	0.346643	0.34217	1.01308	0.311024	0.152151	0.0949395
PPE10	1362.97	0.215419	0.074577	2.88854	0.0038703	0.00410734	0.18766
PPE11	619.045	0.138224	0.136561	1.01218	0.311454	0.152259	0.0921213
PPE12	3548.69	-0.0977986	0.098633	-0.99154	0.321422	0.155706	-0.0769227
PPE13	1715.39	-0.0824047	0.100223	-0.822213	0.410956	0.189996	-0.0643291
PPE14	263.076	0.23922	0.102355	2.33715	0.0194315	0.0158572	0.188021
PPE15	268.425	0.261962	0.105147	2.4914	0.012724	0.0112019	0.204257
PPE16	603.358	0.201356	0.297884	0.675954	0.49907	0.220088	0.0645329
PPE17	5197.56	-0.0192181	0.229657	-0.0836818	0.933309	0.347023	-0.00820727
PPE18	26155.1	-0.171219	0.0855227	-2.00203	0.0452818	0.0322108	-0.142739
PPE19	31000.8	0.0872738	0.0814515	1.07148	0.283953	0.142092	0.0734662
PPE2	3421.78	0.182772	0.0422894	4.32194	1.54663e-05	3.23508e-05	0.174218
PPE20	5220.99	-0.33442	0.0587502	-5.69223	1.25393e-08	5.0905e-08	-0.30936
PPE21	1892.66	-0.273973	0.121093	-2.2625	0.0236664	0.018689	-0.199867
PPE22	226.324	0.330249	0.13611	2.42633	0.0152523	0.0130066	0.227966
PPE23	415.024	0.292919	0.096079	3.04873	0.00229814	0.00262037	0.238182
PPE24	3704.14	0.0491523	0.354635	0.1386	0.889766	0.334981	0.0124747
PPE25	1084.91	0.128104	0.123529	1.03704	0.299717	0.148078	0.0905688
PPE26	3191.57	0.289396	0.0602669	4.8019	1.57167e-06	4.07382e-06	0.265476
PPE27	586.946	0.248369	0.192669	1.28909	0.197366	0.107579	0.128721
PPE28	2087.11	0.0183581	0.0659533	0.27835	0.780743	0.305094	0.016301
PPE29	195.33	0.163533	0.294029	0.556181	0.578087	0.245832	0.0530638
PPE3	1477.05	-0.221719	0.0656715	-3.37619	0.000734973	0.000974446	-0.198976
PPE30	504.544	0.370965	0.209384	1.7717	0.0764451	0.0494482	0.182677
PPE31	316.317	0.194288	0.106751	1.82001	0.0687579	0.0452475	0.148985
PPE32	1275.71	-0.0746962	0.0827452	-0.902726	0.366671	0.173771	-0.0625371
PPE33	2919.19	0.00383565	0.0486409	0.0788565	0.937147	0.347732	0.00358647
PPE34	2751.8	0.0222049	0.399446	0.0555892	0.955669	0.351507	0.00479581
PPE35	6596.19	0.221262	0.0849656	2.60414	0.00921057	0.00854735	0.185817
PPE36	1219.62	-0.175035	0.0963753	-1.81618	0.0693433	0.0455496	-0.139852
PPE37	609.419	-0.23199	0.0897893	-2.58372	0.00977421	0.00897218	-0.191545
PPE38	2143.03	0.81141	0.405431	2.00135	0.0453544	0.0322327	0.207538
PPE39	70.374	0.87532	0.890099	0.983396	0.325412	0.157269	0.0653832
PPE4	6211.49	0.170693	0.0775847	2.20009	0.0278008	0.0213684	0.14654
PPE40	6837.89	-0.332162	0.0775222	-4.28474	1.82957e-05	3.72945e-05	-0.290677
PPE41	11826.2	-0.163805	0.058857	-2.7831	0.00538424	0.00546543	-0.149463
PPE42	2269.13	0.0531873	0.0453293	1.17335	0.240655	0.12557	0.0501718
PPE43	274.025	0.237159	0.141674	1.67397	0.0941357	0.0583258	0.156409
PPE44	1939.76	-0.0156498	0.0621754	-0.251703	0.80127	0.310369	-0.0140675
PPE45	413.133	0.201726	0.12897	1.56413	0.117787	0.0701162	0.140311
PPE49	1623.03	-0.264916	0.164841	-1.6071	0.108033	0.0653966	-0.157363
PPE5	3300.49	-0.0857618	0.317139	-0.270424	0.786834	0.306726	-0.0251943
PPE50	4644.75	-0.211529	0.0680045	-3.11051	0.00186766	0.00220264	-0.188272
PPE51	9507.6	0.307676	0.0650059	4.73305	2.21176e-06	5.5339e-06	0.278996
PPE52	4187.87	0.161937	0.0614617	2.63476	0.00841956	0.00793075	0.146595
PPE53	18435.8	-0.0711061	0.705787	-0.100747	0.919751	0.343488	-0.00679406
PPE55	12592.6	-0.000566357	0.125065	-0.00452851	0.996387	0.360796	-0.000395373
PPE56	6256.62	0.210292	0.323404	0.650245	0.515534	0.225554	0.060806
PPE57	456.935	-0.409441	0.111837	-3.66105	0.000251185	0.000380253	-0.321063
PPE58	415.668	-0.312548	0.125428	-2.49185	0.012708	0.0112015	-0.225471
PPE59	3074.63	-0.342859	0.0872197	-3.93098	8.45994e-05	0.000145666	-0.290758
PPE6	2698.78	-0.169474	0.0882301	-1.92081	0.0547551	0.0375412	-0.139797
PPE60	74534.4	0.147906	0.0875757	1.68889	0.0912406	0.0572997	0.122084
PPE61	321.479	0.318135	0.267002	1.19151	0.233454	0.122925	0.118501
PPE62	821.952	-0.0313916	0.264177	-0.118828	0.905412	0.3391	-0.0114905
PPE63	737.8	0.0441848	0.0846838	0.521762	0.601836	0.252724	0.0366817
PPE64	862.93	0.129636	0.186322	0.695761	0.486578	0.215701	0.0681673
PPE65	199.451	0.222636	0.11621	1.91581	0.0553895	0.0378681	0.164504
PPE66	1349.58	-0.0747951	0.0701415	-1.06634	0.286268	0.142953	-0.0655543
PPE67	410.951	-0.125085	0.122295	-1.02282	0.306393	0.150364	-0.0889073
PPE68	8797.23	0.194166	0.0533814	3.63734	0.000275468	0.000413108	0.180221
PPE69	612.354	0.260685	0.0780158	3.34144	0.000833461	0.001089	0.225538
PPE7	1428.37	-0.206974	0.0846199	-2.44593	0.0144479	0.0124335	-0.173762
PPE8	7823.84	-0.128654	0.23062	-0.557861	0.576939	0.245593	-0.0549724
PPE9	227.504	-0.0950797	0.105862	-0.898151	0.369105	0.174752	-0.0725147
Rv0004	1237.38	0.177335	0.0576895	3.07395	0.00211243	0.00244137	0.162485
Rv0007	3968.19	-0.0189679	0.0430445	-0.440657	0.659461	0.269923	-0.0179868
Rv0008c	348.681	0.196042	0.104186	1.88165	0.0598839	0.0404798	0.152008
Rv0010c	5623.6	-0.0320497	0.0386879	-0.828418	0.407434	0.188988	-0.0306961
Rv0011c	2836.48	-0.172863	0.0730661	-2.36584	0.0179894	0.0148828	-0.150806
Rv0012	2171.3	-0.0127204	0.0529337	-0.240307	0.810092	0.312506	-0.0117559
Rv0021c	1273.01	0.0196252	0.0639242	0.307007	0.758838	0.299211	0.0175426
Rv0023	331.616	0.306665	0.0934467	3.28171	0.00103181	0.00131595	0.252515
Rv0024	492.112	0.250802	0.0859443	2.91819	0.0035207	0.00379786	0.21063
Rv0025	543.255	0.0797234	0.0714276	1.11614	0.264362	0.134816	0.0695755
Rv0026	1767.87	-0.180133	0.0508002	-3.54592	0.000391241	0.000564411	-0.168214
Rv0027	497.405	-0.193503	0.0717394	-2.6973	0.00699036	0.00680698	-0.169862
Rv0028	920.421	-0.142973	0.0704662	-2.02896	0.042462	0.0305213	-0.12558
Rv0029	1663.08	0.0125145	0.0735948	0.170046	0.864974	0.327874	0.0108229
Rv0030	669.178	-0.226213	0.113862	-1.98672	0.0469533	0.0331218	-0.168968
Rv0031	342.543	-0.326831	0.103959	-3.14386	0.00166737	0.00199417	-0.259218
Rv0034	352.31	0.343311	0.112916	3.0404	0.00236264	0.00268319	0.263373
Rv0036c	1809.66	0.292869	0.0535955	5.46443	4.6439e-08	1.67317e-07	0.27349
Rv0037c	2014.85	0.114329	0.067869	1.68455	0.0920748	0.0575937	0.101141
Rv0038	2888.52	0.00677698	0.0531518	0.127502	0.898543	0.33714	0.00625917
Rv0039c	466.952	0.178123	0.159339	1.11789	0.263616	0.134579	0.107096
Rv0042c	1995.44	-0.27695	0.0483803	-5.72443	1.03781e-08	4.26116e-08	-0.261585
Rv0043c	1090.52	-0.187098	0.0815472	-2.29436	0.0217699	0.0174139	-0.158557
Rv0044c	848.982	-0.0290418	0.0779413	-0.372612	0.709437	0.284176	-0.0247269
Rv0045c	4081.55	-0.255288	0.0420647	-6.06895	1.28753e-09	6.16462e-09	-0.244193
Rv0047c	5961.74	-0.0392305	0.0649102	-0.604381	0.54559	0.23584	-0.034963
Rv0048c	1682.83	-0.0581698	0.0722021	-0.805653	0.420443	0.193095	-0.0505939
Rv0049	1922.43	0.0379431	0.0585609	0.647925	0.517034	0.226072	0.0345001
Rv0051	2788.48	-0.00589735	0.064512	-0.0914149	0.927163	0.345629	-0.0052611
Rv0052	864.509	0.0107893	0.0663534	0.162604	0.87083	0.32966	0.00956714
Rv0057	1272.96	-0.448887	0.0933476	-4.80877	1.51864e-06	3.95772e-06	-0.381474
Rv0059	1772.43	-0.0855189	0.0740878	-1.15429	0.248381	0.128562	-0.0739543
Rv0060	7352.39	-0.39405	0.0485427	-8.1176	4.7551e-16	4.89494e-15	-0.375192
Rv0061c	8962.95	-0.204659	0.0647273	-3.16186	0.00156765	0.00188901	-0.18395
Rv0063	847.853	-0.00586505	0.0706292	-0.08304	0.93382	0.347034	-0.00512542
Rv0064	11630.7	-0.539783	0.063963	-8.43899	3.201e-17	3.75056e-16	-0.507615
Rv0067c	270.784	-0.196013	0.105008	-1.86665	0.0619499	0.0416032	-0.151459
Rv0068	546.585	0.0854694	0.0742653	1.15087	0.249787	0.12912	0.0738646
Rv0071	833.386	0.100354	0.0791462	1.26796	0.204811	0.110841	0.0852619
Rv0072	4577.41	-0.185212	0.0429208	-4.3152	1.59462e-05	3.32098e-05	-0.176312
Rv0073	4934.36	-0.035275	0.037723	-0.935105	0.349734	0.166897	-0.0338555
Rv0074	2197.25	0.208966	0.0948239	2.20373	0.0275434	0.0212385	0.168664
Rv0075	3009.56	-0.122165	0.045033	-2.71278	0.00667205	0.00656353	-0.115484
Rv0076c	1346.25	-0.311099	0.0517546	-6.01105	1.84329e-09	8.46021e-09	-0.292224
Rv0077c	472.952	0.0212175	0.0849173	0.249861	0.802695	0.31061	0.0175914
Rv0078	542.69	-0.0945063	0.0944609	-1.00048	0.317078	0.154224	-0.0756107
Rv0078A	3320.5	-0.344872	0.0616731	-5.59194	2.24545e-08	8.65264e-08	-0.316932
Rv0078B	1211.06	-0.189602	0.0930299	-2.03808	0.0415419	0.0299196	-0.153789
Rv0079	2908.39	-0.950768	0.143956	-6.60458	3.98649e-11	2.27985e-10	-0.885868
Rv0080	2043.74	-1.97043	0.143693	-13.7128	8.51052e-43	6.45533e-41	-1.95337
Rv0081	213.768	-2.60762	0.189698	-13.7462	5.3712e-43	4.30046e-41	-2.57076
Rv0082	350.168	-1.45259	0.108931	-13.335	1.44829e-40	9.07494e-39	-1.44204
Rv0083	385.504	-1.10279	0.103385	-10.6668	1.45523e-26	3.74506e-25	-1.0826
Rv0088	2465.69	-0.732348	0.0586084	-12.4956	7.88786e-36	3.66703e-34	-0.716755
Rv0089	892.806	-0.804773	0.119659	-6.72554	1.74941e-11	1.0505e-10	-0.74042
Rv0090	187.724	0.0141477	0.293992	0.0481228	0.961618	0.3525	0.0045597
Rv0093c	680.897	0.22389	0.0644604	3.4733	0.000514109	0.000715173	0.201714
Rv0094c	4252.96	0.425088	0.36601	1.16141	0.245474	0.127433	0.107977
Rv0095c	88.2632	-0.0605312	0.20222	-0.299334	0.764685	0.300874	-0.029393
Rv0097	606.531	-0.264173	0.15323	-1.72403	0.0847023	0.0538801	-0.165825
Rv0100	173.567	-0.43714	0.11672	-3.74519	0.000180258	0.00028268	-0.338968
Rv0102	2911.46	0.0438847	0.0437299	1.00354	0.315601	0.153816	0.0415539
Rv0104	1594.81	0.0429453	0.0653822	0.656836	0.511287	0.224427	0.0382169
Rv0106	821.42	-0.279263	0.0905886	-3.08276	0.00205089	0.00238169	-0.23142
Rv0108c	9661.53	0.0525324	0.0608558	0.863229	0.388012	0.181851	0.0474404
Rv0110	692.342	0.0326147	0.114126	0.285779	0.775048	0.303527	0.023928
Rv0111	2163.91	0.0763646	0.0506072	1.50897	0.131307	0.076863	0.0710871
Rv0121c	221.547	0.236373	0.109614	2.15642	0.0310512	0.023454	0.180111
Rv0122	233.376	-0.208396	0.121869	-1.71	0.087266	0.0551845	-0.149838
Rv0123	670.477	-0.307404	0.074602	-4.12059	3.77907e-05	7.15677e-05	-0.270636
Rv0128	1278.45	-0.105067	0.0538903	-1.94965	0.0512176	0.0354531	-0.0970006
Rv0133	1101.65	0.037842	0.0836907	0.452165	0.65115	0.267432	0.0315324
Rv0135c	2582.91	-0.18564	0.0594993	-3.12003	0.0018083	0.00214492	-0.169287
Rv0138	497.808	-0.21073	0.0875752	-2.40628	0.0161159	0.0135744	-0.175022
Rv0139	1787.93	0.0967261	0.0436382	2.21655	0.0266539	0.0206632	0.0916844
Rv0140	2025.61	-0.251768	0.0902244	-2.79046	0.0052633	0.00535784	-0.208079
Rv0141c	2752.88	-0.181514	0.0771404	-2.35303	0.0186213	0.0153264	-0.156221
Rv0142	888.778	0.459395	0.101861	4.51003	6.48197e-06	1.47345e-05	0.380031
Rv0143c	2504.81	0.174678	0.0641594	2.72256	0.00647778	0.00639425	0.156942
Rv0144	12410.1	0.0158025	0.0485931	0.325199	0.74503	0.295221	0.0147782
Rv0145	10356.5	0.142625	0.0762319	1.87094	0.0613539	0.0412799	0.122778
Rv0146	2500	-0.0279367	0.0486446	-0.574303	0.565763	0.242309	-0.0261242
Rv0147	7214.79	-0.0725699	0.0446533	-1.62519	0.104123	0.0636112	-0.0685885
Rv0148	3862.34	-0.0331012	0.0506291	-0.653799	0.513242	0.224892	-0.0307913
Rv0149	3912.17	-0.0876783	0.0413088	-2.12251	0.0337949	0.0251442	-0.0835427
Rv0150c	547.376	-0.085485	0.0767619	-1.11364	0.265435	0.135172	-0.0732167
Rv0157A	535.941	-0.304673	0.10673	-2.85461	0.00430893	0.0045163	-0.237846
Rv0158	801.249	-0.238911	0.0725156	-3.29462	0.000985542	0.00126252	-0.210075
Rv0161	344.979	0.28369	0.130969	2.16608	0.0303047	0.0229744	0.198348
Rv0163	668.339	-0.0838441	0.0740237	-1.13267	0.257355	0.132178	-0.0725177
Rv0175	18005.5	0.241691	0.0593135	4.07481	4.60515e-05	8.50875e-05	0.2214
Rv0176	4260.17	0.205158	0.0516274	3.97382	7.07278e-05	0.000124915	0.191422
Rv0177	6111.79	-0.11824	0.0304255	-3.88623	0.000101815	0.000170484	-0.115177
Rv0178	7583.07	-0.0767639	0.0281063	-2.7312	0.0063104	0.00625756	-0.0750287
Rv0180c	2748.68	-0.231896	0.0436777	-5.30925	1.10077e-07	3.66375e-07	-0.220817
Rv0181c	1033.59	-0.369302	0.0668783	-5.522	3.35168e-08	1.2356e-07	-0.335577
Rv0183	1274	-0.0667069	0.0551016	-1.21062	0.226043	0.119855	-0.0613099
Rv0184	943.812	-0.139493	0.0702275	-1.9863	0.0470001	0.0331386	-0.122596
Rv0185	529.467	-0.266573	0.0969777	-2.74881	0.00598128	0.005982	-0.215052
Rv0187	825.451	0.252431	0.0733098	3.44334	0.000574571	0.000784145	0.221698
Rv0188	4101.26	-0.427232	0.0740852	-5.76676	8.0809e-09	3.37565e-08	-0.383828
Rv0190	3656.4	0.0238424	0.105493	0.226009	0.821194	0.315259	0.0181633
Rv0191	2123.18	0.0836773	0.0744965	1.12324	0.261337	0.1337	0.072251
Rv0192	2455.54	0.00703218	0.0500702	0.140446	0.888307	0.334607	0.00655038
Rv0193c	1332.9	-0.240608	0.105695	-2.27644	0.0228195	0.0181495	-0.186536
Rv0194	661.457	0.212593	0.162321	1.30971	0.190294	0.10446	0.126634
Rv0195	101.113	0.135919	0.292438	0.464779	0.64209	0.264541	0.0443005
Rv0196	91.2444	0.220189	0.186386	1.18137	0.237457	0.124456	0.117037
Rv0197	631.582	0.116003	0.0953309	1.21685	0.223662	0.118858	0.0926047
Rv0199	800.713	-0.0367052	0.0634996	-0.578038	0.563239	0.241513	-0.0328615
Rv0200	1813.29	0.139723	0.0485087	2.88038	0.00397194	0.00419359	0.131025
Rv0201c	1672.23	0.207568	0.0719582	2.88456	0.00391965	0.00415055	0.182299
Rv0203	699.387	0.161082	0.0961011	1.67617	0.0937041	0.0581584	0.128667
Rv0204c	2417.5	-0.00348386	0.0696154	-0.0500443	0.960087	0.352254	-0.0030552
Rv0205	1743.08	-0.0444851	0.0434803	-1.02311	0.306256	0.150364	-0.0421479
Rv0207c	8008.31	-0.0914024	0.0459638	-1.98857	0.0467484	0.0330257	-0.0861417
Rv0208c	2554.3	-0.065095	0.0405455	-1.60548	0.108388	0.0655778	-0.06211
Rv0209	424.035	0.293436	0.104683	2.8031	0.00506147	0.00519548	0.230518
Rv0210	529.046	0.575978	0.0793608	7.25772	3.93673e-13	2.87995e-12	0.528599
Rv0213c	1378.74	-0.228762	0.0784543	-2.91586	0.00354708	0.00381489	-0.196884
Rv0216	792.189	0.00731335	0.0684586	0.106829	0.914925	0.341952	0.00643901
Rv0218	598.696	0.235198	0.191949	1.22532	0.220455	0.117585	0.122036
Rv0219	98.7922	0.377771	0.165978	2.27603	0.022844	0.018159	0.229717
Rv0221	2618.32	-0.0471727	0.0513682	-0.918325	0.358449	0.170434	-0.0437994
Rv0223c	1762.64	-0.0849576	0.0612913	-1.38613	0.165708	0.0933597	-0.0766815
Rv0224c	626.774	0.069288	0.0841412	0.823473	0.410239	0.189739	0.0576875
Rv0225	2345.44	0.186182	0.0559734	3.32626	0.0008802	0.00114384	0.171512
Rv0226c	945.823	0.511054	0.0817708	6.24984	4.10884e-10	2.11484e-09	0.457743
Rv0227c	5176.73	0.211977	0.0652966	3.24637	0.00116887	0.00146482	0.190301
Rv0228	1053.21	0.134099	0.0534624	2.50828	0.012132	0.0107862	0.124081
Rv0229c	2319.17	0.0226077	0.0524549	0.430993	0.666474	0.271943	0.0209227
Rv0232	2398.5	0.209419	0.124393	1.68353	0.0922717	0.0576667	0.148893
Rv0235c	1322.35	0.0299077	0.0655393	0.456332	0.648151	0.266688	0.0265958
Rv0236A	1543.56	0.0500305	0.068435	0.731066	0.464739	0.207907	0.044076
Rv0238	2185.4	-0.0952167	0.0604059	-1.57628	0.114961	0.0686896	-0.0862066
Rv0245	1743.07	0.0141439	0.060883	0.232313	0.816295	0.314048	0.0127658
Rv0246	2636.62	-0.414227	0.0854628	-4.84687	1.25425e-06	3.34738e-06	-0.358428
Rv0247c	5275.37	-0.378147	0.0638336	-5.92394	3.14319e-09	1.38953e-08	-0.346871
Rv0248c	10339.8	-0.187449	0.0388241	-4.82816	1.37802e-06	3.6574e-06	-0.180021
Rv0249c	6778.44	-0.507938	0.068325	-7.43414	1.05248e-13	8.19896e-13	-0.470316
Rv0250c	5475.87	-0.142069	0.101646	-1.39768	0.162209	0.091819	-0.110705
Rv0257	2805.13	0.199228	0.0426708	4.66896	3.02734e-06	7.44517e-06	0.189862
Rv0258c	580.381	-0.213159	0.0892806	-2.38752	0.0169623	0.014155	-0.175932
Rv0259c	171.01	0.084426	0.161519	0.522701	0.601182	0.252523	0.0497997
Rv0260c	122.016	-0.162076	0.298938	-0.542171	0.587701	0.248414	-0.0515214
Rv0263c	687.454	0.0183818	0.0796319	0.230835	0.817443	0.314238	0.0155505
Rv0264c	316.077	-0.146649	0.0997626	-1.46998	0.141568	0.0818715	-0.115226
Rv0265c	957.637	0.147724	0.0782137	1.88873	0.0589287	0.039909	0.126308
Rv0268c	2524.01	0.225646	0.0947757	2.38084	0.017273	0.014368	0.18255
Rv0269c	946.145	0.121617	0.113663	1.06997	0.284632	0.142284	0.0898191
Rv0272c	3340.42	-0.0252656	0.0428909	-0.589068	0.555816	0.239255	-0.0239683
Rv0273c	967.995	-0.105662	0.0817594	-1.29235	0.196237	0.107183	-0.0889239
Rv0274	2822.36	-0.150428	0.0773196	-1.94554	0.0517103	0.035777	-0.129062
Rv0275c	3062.75	-0.0196864	0.094608	-0.208084	0.835163	0.319516	-0.0157007
Rv0276	15274.7	0.224589	0.0509872	4.40481	1.05878e-05	2.31194e-05	0.210127
Rv0281	2702.17	-0.132141	0.0627662	-2.10529	0.0352664	0.0260507	-0.118948
Rv0293c	4523.79	-0.186741	0.072274	-2.58379	0.00977202	0.00897218	-0.163538
Rv0295c	1742.93	-0.00123486	0.0613937	-0.0201138	0.983953	0.357916	-0.00111271
Rv0296c	1693.77	-0.10969	0.0490247	-2.23745	0.0252569	0.0197074	-0.102625
Rv0298	1982.13	-0.0277203	0.0829718	-0.334094	0.738309	0.292799	-0.0231582
Rv0299	2470.74	-0.174044	0.0725551	-2.39879	0.0164494	0.0137772	-0.152117
Rv0302	1258.21	-0.0638035	0.0745498	-0.85585	0.392081	0.183162	-0.0550422
Rv0303	748.425	0.207607	0.0720178	2.88271	0.00394268	0.00416575	0.182298
Rv0306	433.119	0.0689611	0.0899541	0.766626	0.443304	0.201221	0.0561189
Rv0307c	530.093	0.237538	0.0807732	2.9408	0.00327369	0.00357691	0.202959
Rv0308	2164.82	-0.155227	0.0454563	-3.41486	0.000638158	0.000858726	-0.146744
Rv0309	7146.8	-0.17857	0.0544267	-3.28092	0.00103468	0.00131844	-0.165135
Rv0310c	1644.95	-0.195823	0.0671414	-2.91658	0.00353888	0.00381177	-0.174552
Rv0311	827.755	0.00605474	0.0927809	0.0652585	0.947968	0.350394	0.00486464
Rv0312	6502.77	-0.228506	0.0406642	-5.61934	1.91689e-08	7.52744e-08	-0.218952
Rv0313	5646.35	-0.135949	0.0427358	-3.18115	0.00146694	0.00178256	-0.12926
Rv0314c	4760.3	-0.0356679	0.0561499	-0.635225	0.525281	0.228569	-0.0326652
Rv0315	5800.18	-0.198494	0.0575948	-3.44639	0.000568121	0.000776813	-0.182156
Rv0316	1418.74	0.0645379	0.0785104	0.82203	0.41106	0.189996	0.0548792
Rv0318c	519.823	0.045308	0.116569	0.388681	0.697512	0.280525	0.0328915
Rv0320	435.005	-0.903822	0.0837625	-10.7903	3.82526e-27	1.0209e-25	-0.883612
Rv0323c	670.722	-0.121686	0.085044	-1.43086	0.152469	0.0871339	-0.101235
Rv0324	740.068	-0.20648	0.136011	-1.51812	0.128985	0.0756574	-0.139128
Rv0325	394.655	-0.384666	0.144033	-2.67068	0.00756978	0.00728262	-0.260007
Rv0326	357.217	-0.421887	0.158576	-2.66048	0.00780293	0.00746705	-0.269842
Rv0328	1125.39	0.08235	0.0776492	1.06054	0.2889	0.143868	0.0702941
Rv0329c	545.158	0.133643	0.0909781	1.46895	0.141845	0.0819989	0.10872
Rv0330c	238.451	0.190191	0.130518	1.4572	0.145061	0.0834894	0.131142
Rv0331	5506.9	-0.428561	0.356652	-1.20162	0.22951	0.121351	-0.112902
Rv0332	2604.2	-0.0841963	0.159786	-0.526931	0.598242	0.251771	-0.0500748
Rv0333	695.175	0.0206572	0.0698365	0.295794	0.767387	0.301592	0.0181034
Rv0336	5363.97	0.330554	0.0687756	4.80627	1.53776e-06	3.99671e-06	0.297235
Rv0338c	13469.6	-0.00804015	0.0487164	-0.16504	0.868913	0.329107	-0.00751638
Rv0339c	1713.01	0.260265	0.0520588	4.99945	5.74933e-07	1.66048e-06	0.2434
Rv0340	1938.36	0.202812	0.0584308	3.47099	0.000518549	0.00071996	0.185728
Rv0345	1158.48	-0.143475	0.0564912	-2.53977	0.0110924	0.0100226	-0.131681
Rv0347	1906.11	-0.242777	0.0820806	-2.95779	0.00309853	0.00341139	-0.20659
Rv0348	1746.29	-0.232137	0.0605789	-3.83198	0.000127116	0.000207705	-0.211719
Rv0349	1245	-0.390002	0.0884305	-4.41026	1.03245e-05	2.26475e-05	-0.33238
Rv0356c	837.102	0.0414053	0.0646671	0.640284	0.521988	0.227734	0.0369319
Rv0358	169.327	0.400522	0.124489	3.21733	0.0012939	0.00158836	0.297042
Rv0359	522.062	0.102658	0.0885523	1.15929	0.246336	0.127749	0.0841455
Rv0360c	249.638	0.53806	0.148094	3.63323	0.000279895	0.000418875	0.381268
Rv0361	2613.46	-0.142934	0.0574835	-2.48653	0.0128997	0.0113151	-0.130805
Rv0364	2489.58	-0.175346	0.0499729	-3.50882	0.000450106	0.000636586	-0.164055
Rv0365c	1213.55	0.0291836	0.0525111	0.555762	0.578374	0.245881	0.0270057
Rv0366c	181.308	0.0884572	0.116984	0.75615	0.449559	0.203249	0.0642218
Rv0367c	226.699	0.505649	0.160179	3.15678	0.00159523	0.00191743	0.333058
Rv0368c	82.2685	0.260678	0.17684	1.47409	0.140457	0.0813098	0.146073
Rv0369c	133.458	-0.00316426	0.157795	-0.020053	0.984001	0.357916	-0.00189512
Rv0370c	233.203	-0.22741	0.186645	-1.21841	0.223068	0.118671	-0.120865
Rv0371c	38.6065	0.217916	0.248213	0.877937	0.379978	0.179017	0.0867882
Rv0372c	40.1155	0.51326	0.2696	1.90379	0.0569381	0.0387613	0.200517
Rv0373c	384.886	0.205944	0.157132	1.31064	0.189979	0.10446	0.125618
Rv0374c	48.5475	0.2979	0.297558	1.00115	0.316754	0.154118	0.0968967
Rv0375c	88.6909	0.39571	0.298529	1.32553	0.184996	0.102228	0.130848
Rv0376c	279.142	0.347132	0.181076	1.91705	0.0552314	0.0378318	0.194516
Rv0377	721.201	0.257764	0.0628367	4.10212	4.09382e-05	7.68216e-05	0.234054
Rv0378	40.2182	0.641604	0.372231	1.72367	0.0847675	0.0538882	0.170789
Rv0380c	844.548	0.377886	0.0853256	4.42875	9.47794e-06	2.09178e-05	0.324708
Rv0381c	2235.26	0.162135	0.0581046	2.7904	0.00526425	0.00535784	0.148253
Rv0383c	6449.84	-0.0356024	0.0833221	-0.427286	0.669171	0.272812	-0.029707
Rv0385	642.081	0.14239	0.0807113	1.76419	0.0776994	0.0501246	0.120589
Rv0386	1872.32	0.298143	0.10416	2.86236	0.00420496	0.00441375	0.234928
Rv0387c	185.152	0.231252	0.12685	1.82303	0.0682986	0.0450481	0.163147
Rv0390	595.448	-0.111648	0.0918385	-1.2157	0.224098	0.119043	-0.0903738
Rv0393	490.94	0.26702	0.0819104	3.2599	0.00111451	0.00140526	0.228062
Rv0394c	603.911	0.0854636	0.0886263	0.964315	0.334888	0.160931	0.0699673
Rv0395	61.3726	0.484273	0.703972	0.687915	0.491506	0.217417	0.0478553
Rv0396	145.253	-0.165504	0.214639	-0.771078	0.44066	0.200527	-0.0764083
Rv0397	162.713	0.461329	0.512745	0.899723	0.368268	0.174413	0.0726612
Rv0397A	1246.78	-0.135378	0.0546367	-2.47779	0.0132198	0.0115537	-0.124862
Rv0398c	978.875	0.111269	0.0869054	1.28035	0.200422	0.108952	0.0918425
Rv0401	152.128	0.292671	0.117547	2.48982	0.0127808	0.0112313	0.21767
Rv0406c	584.112	0.0233723	0.0734736	0.318105	0.750406	0.29678	0.0202237
Rv0412c	6794.87	-0.262112	0.0690796	-3.79435	0.00014803	0.000237934	-0.233619
Rv0420c	1568.24	-0.131977	0.0426241	-3.09631	0.00195949	0.00228846	-0.125501
Rv0421c	648.225	0.16534	0.0890408	1.8569	0.0633249	0.0423687	0.135904
Rv0424c	2454.57	0.0138196	0.0601016	0.229938	0.81814	0.314422	0.0125035
Rv0426c	1884.31	0.0645186	0.0595396	1.08362	0.278532	0.140256	0.0585173
Rv0428c	526.591	0.139343	0.0683462	2.03878	0.0414716	0.0298988	0.123239
Rv0430	2220.52	-0.202074	0.0732433	-2.75894	0.00579885	0.00581569	-0.176617
Rv0433	3488.89	-0.175707	0.0459899	-3.82057	0.000133146	0.000216089	-0.166022
Rv0434	1718.43	0.0288495	0.0427991	0.674067	0.500269	0.220549	0.0273745
Rv0435c	2899.96	0.241162	0.0485358	4.96873	6.73922e-07	1.92324e-06	0.227211
Rv0439c	933.925	-1.08771	0.0851696	-12.7711	2.37665e-37	1.18109e-35	-1.07381
Rv0441c	1487.25	0.179975	0.0620412	2.9009	0.00372098	0.0039664	0.162818
Rv0443	1958.21	0.134338	0.0558085	2.40713	0.0160786	0.0135667	0.123487
Rv0446c	1131.79	0.0548449	0.0625766	0.876444	0.380789	0.179282	0.049263
Rv0448c	450.08	0.145857	0.0918773	1.58752	0.112394	0.0676043	0.118348
Rv0449c	1754.33	0.16203	0.0564594	2.86984	0.00410676	0.00432011	0.14886
Rv0452	1170.4	0.0402043	0.0724721	0.554756	0.579061	0.245885	0.0349208
Rv0454	1727.62	-0.295421	0.0531223	-5.56114	2.68013e-08	1.00587e-07	-0.276251
Rv0455c	3713.51	-0.133163	0.0652574	-2.04057	0.0412931	0.0298149	-0.118929
Rv0457c	718.674	-0.0151296	0.106464	-0.14211	0.886993	0.334199	-0.0114763
Rv0458	2854.99	0.281647	0.0662999	4.24808	2.15613e-05	4.32178e-05	0.253711
Rv0459	1968.12	0.1612	0.0819232	1.96769	0.0491033	0.0343526	0.136104
Rv0460	2117.49	-0.0457965	0.0567661	-0.806758	0.419806	0.192933	-0.0418706
Rv0461	2181.13	0.00181186	0.0540127	0.033545	0.97324	0.355631	0.00166932
Rv0463	892.42	-0.0289362	0.0661829	-0.437215	0.661955	0.27079	-0.0256768
Rv0464c	2231.39	-0.271134	0.0534714	-5.07064	3.9649e-07	1.18304e-06	-0.252859
Rv0465c	1012.64	0.100928	0.148312	0.680511	0.496181	0.219188	0.0634536
Rv0466	2615.13	0.0017098	0.0486112	0.035173	0.971942	0.355246	0.00159884
Rv0470A	258.579	-0.189902	0.106846	-1.77734	0.0755122	0.0489767	-0.145484
Rv0471c	595.754	-0.0719594	0.0839425	-0.857246	0.391309	0.18298	-0.0599636
Rv0472c	2938.91	-0.270068	0.0404096	-6.68328	2.33659e-11	1.37446e-10	-0.259371
Rv0473	2127.69	-0.144327	0.0542416	-2.66082	0.00779503	0.00746705	-0.133315
Rv0474	2108.55	-0.191382	0.0761682	-2.51263	0.0119836	0.0106806	-0.165427
Rv0476	2237.27	-0.0486669	0.0995738	-0.488752	0.625017	0.259959	-0.0380434
Rv0477	3431.7	-0.240072	0.0755924	-3.17588	0.00149383	0.00181066	-0.208944
Rv0479c	6548.11	-0.179614	0.0543415	-3.30528	0.000948818	0.00122309	-0.166149
Rv0480c	518.982	0.0467196	0.0726772	0.642837	0.52033	0.22734	0.0405557
Rv0481c	1115.57	-0.156953	0.0678395	-2.3136	0.0206898	0.0166861	-0.139198
Rv0484c	1060.66	0.0915268	0.0684334	1.33746	0.181073	0.100524	0.0807356
Rv0485	6280.28	0.0119341	0.05957	0.200337	0.841217	0.32132	0.0108152
Rv0487	2850.28	-0.0128038	0.0604439	-0.21183	0.83224	0.318566	-0.0115721
Rv0488	217.051	-0.707422	0.238441	-2.96687	0.00300851	0.00333009	-0.365476
Rv0492A	113.845	0.477112	0.148178	3.21986	0.00128255	0.00157846	0.327727
Rv0492c	730.904	0.365873	0.0653387	5.59963	2.14813e-08	8.34455e-08	0.333734
Rv0493c	562.299	0.24366	0.0693604	3.51295	0.000443163	0.000629429	0.216571
Rv0494	183.448	0.0866038	0.111365	0.777656	0.436772	0.19945	0.0644552
Rv0495c	1573.76	0.155038	0.0657905	2.35654	0.0184463	0.0152084	0.138401
Rv0496	2527.16	0.0166182	0.0531373	0.312741	0.754477	0.297899	0.0153497
Rv0497	1498.15	0.138344	0.0746883	1.85229	0.0639843	0.0426515	0.119714
Rv0498	959.788	-0.0169939	0.0605527	-0.280646	0.778982	0.304653	-0.0153542
Rv0499	686.285	0.187986	0.0924578	2.03321	0.0420312	0.0302418	0.152798
Rv0500A	3021.71	-0.189112	0.0751717	-2.51574	0.0118783	0.0106195	-0.164003
Rv0500B	3173.01	-0.0388401	0.0949109	-0.409227	0.682373	0.276645	-0.0309484
Rv0502	17543.3	-0.0748829	0.0505266	-1.48205	0.138327	0.0803844	-0.0697208
Rv0504c	1107.6	-0.110533	0.0801924	-1.37835	0.168095	0.0943356	-0.093597
Rv0508	657.245	0.0124187	0.0807662	0.153761	0.877798	0.331601	0.0104607
Rv0513	1783.53	0.0826326	0.0740995	1.11516	0.264783	0.134936	0.0714472
Rv0514	488.674	0.403105	0.126287	3.19196	0.00141309	0.00172294	0.296873
Rv0515	5597.19	0.365366	0.0669307	5.45887	4.79176e-08	1.71359e-07	0.33178
Rv0516c	3725.98	0.899266	0.102487	8.77447	1.7171e-18	2.42612e-17	0.866992
Rv0517	2496.16	0.158017	0.0476423	3.31675	0.000910726	0.0011782	0.148604
Rv0518	1291.66	-0.135562	0.0573772	-2.36264	0.0181455	0.0149947	-0.124054
Rv0519c	985.815	-0.0551605	0.0872075	-0.63252	0.527047	0.22913	-0.0453581
Rv0520	291.023	-0.121969	0.104018	-1.17258	0.240965	0.12557	-0.0939354
Rv0521	87.5043	0.0748942	0.239119	0.313209	0.754122	0.297856	0.0306849
Rv0523c	261.916	0.268761	0.114994	2.33718	0.0194299	0.0158572	0.20119
Rv0525	303.092	0.257218	0.121572	2.11577	0.0343643	0.0254889	0.186661
Rv0526	707.851	0.248934	0.0801463	3.106	0.00189638	0.00223029	0.213463
Rv0528	1021.45	0.322769	0.0632821	5.10047	3.38807e-07	1.0215e-06	0.294605
Rv0530	3758.32	0.286881	0.0528433	5.42889	5.67041e-08	1.99318e-07	0.268276
Rv0530A	1264.63	0.0992413	0.0742182	1.33716	0.181172	0.100539	0.0858325
Rv0531	907.322	0.0810287	0.0721793	1.1226	0.261606	0.13379	0.0705328
Rv0537c	3936.55	0.285632	0.0762521	3.74589	0.000179753	0.000282195	0.249392
Rv0538	1180.52	0.240846	0.0684945	3.51629	0.000437624	0.000622598	0.214603
Rv0539	1641.13	0.171001	0.0679881	2.51516	0.0118978	0.0106246	0.151727
Rv0540	138.741	0.39468	0.129474	3.04834	0.00230113	0.0026216	0.285873
Rv0541c	1335.77	0.27275	0.077174	3.53422	0.000408979	0.000587062	0.237014
Rv0543c	3082.23	-0.0808009	0.0649786	-1.2435	0.213683	0.114908	-0.0720676
Rv0544c	582.387	0.194162	0.127658	1.52095	0.128271	0.0754227	0.135719
Rv0546c	618.259	-0.0791728	0.0670944	-1.18002	0.237992	0.124645	-0.0701211
Rv0547c	735.876	0.139573	0.0647862	2.15437	0.0312111	0.0235624	0.124886
Rv0552	923.573	0.131195	0.0568816	2.30646	0.0210852	0.016935	0.120209
Rv0556	1567.1	-0.222136	0.0566564	-3.92076	8.82691e-05	0.000150603	-0.20471
Rv0559c	3718.6	-0.156352	0.0418475	-3.73624	0.00018679	0.00029197	-0.149047
Rv0560c	736.42	0.0850044	0.0647247	1.31332	0.189074	0.104123	0.0758899
Rv0561c	405.312	0.242893	0.09149	2.65486	0.00793421	0.00757257	0.199522
Rv0565c	1278.08	-0.275709	0.0939224	-2.9355	0.0033301	0.00362482	-0.22544
Rv0566c	519.386	-0.0163204	0.101711	-0.160458	0.87252	0.330127	-0.0126348
Rv0567	2454.81	-0.101711	0.0488312	-2.08292	0.0372589	0.0272848	-0.0951863
Rv0569	2401.14	-1.56558	0.127491	-12.2799	1.16168e-34	5.07329e-33	-1.55241
Rv0571c	2128.61	-1.61284	0.0898216	-17.9561	4.29979e-72	7.74593e-70	-1.60662
Rv0572c	1367.25	-2.83881	0.185383	-15.3132	6.24287e-53	8.17914e-51	-2.80112
Rv0574c	1665.41	-1.66715	0.151635	-10.9945	4.06037e-28	1.19422e-26	-1.64898
Rv0575c	237.537	-0.0594468	0.102435	-0.580335	0.561689	0.240992	-0.0459277
Rv0576	1375.4	0.00148406	0.0487917	0.0304162	0.975735	0.356271	0.00138709
Rv0579	2766.44	0.211626	0.0487768	4.33867	1.43349e-05	3.04256e-05	0.198948
Rv0580c	1975.22	0.234333	0.0793287	2.95395	0.00313738	0.00345153	0.201181
Rv0584	1371.52	0.0923874	0.0890332	1.03767	0.299422	0.147983	0.0755402
Rv0585c	1631.38	-0.0421094	0.0702304	-0.599589	0.54878	0.236864	-0.0368643
Rv0590A	266.297	-0.175728	0.147106	-1.19456	0.232259	0.122475	-0.111935
Rv0597c	3726.3	0.223625	0.0676082	3.30767	0.000940771	0.0012138	0.199502
Rv0600c	150.577	0.468618	0.313199	1.49623	0.134593	0.0785946	0.14866
Rv0605	883.412	-0.688928	0.0717208	-9.6057	7.56404e-22	1.31339e-20	-0.660446
Rv0606	1106.58	-0.571036	0.0529085	-10.7929	3.71924e-27	1.01133e-25	-0.550142
Rv0607	276.157	-0.588319	0.0866516	-6.78947	1.12545e-11	6.93148e-11	-0.532664
Rv0609A	684.212	-0.182614	0.0629215	-2.90225	0.00370494	0.00395515	-0.16479
Rv0610c	1085.52	0.00832836	0.0643501	0.129423	0.897023	0.336833	0.00743381
Rv0611c	1337.86	-0.0718628	0.0840489	-0.855012	0.392545	0.18332	-0.0598583
Rv0612	258.362	0.355077	0.0993787	3.57297	0.000352956	0.000517566	0.288507
Rv0613c	1955.98	0.451179	0.0858573	5.25499	1.48035e-07	4.82678e-07	0.393212
Rv0614	158.775	0.308034	0.224653	1.37116	0.170326	0.0954754	0.138867
Rv0615	244.946	0.725252	0.176879	4.10026	4.12684e-05	7.72401e-05	0.520735
Rv0616c	362.677	0.119927	0.0915632	1.30977	0.190273	0.10446	0.0972364
Rv0621	748.463	0.0352988	0.0688794	0.512473	0.60832	0.254557	0.0310422
Rv0622	595.145	-0.0524054	0.0743546	-0.704803	0.480933	0.21379	-0.0452266
Rv0625c	259.952	0.320276	0.132335	2.42019	0.0155125	0.0131585	0.224372
Rv0628c	1143.19	0.261221	0.102924	2.538	0.0111488	0.010061	0.205539
Rv0633c	1518.19	-0.308034	0.0695758	-4.42732	9.54127e-06	2.10254e-05	-0.275549
Rv0634A	2058.52	-0.0324091	0.0564327	-0.574295	0.565768	0.242309	-0.0296549
Rv0634c	2620.1	-0.176203	0.0599775	-2.93782	0.00330532	0.00360601	-0.16036
Rv0647c	1981.61	0.11387	0.0477489	2.38476	0.0170902	0.0142452	0.106898
Rv0648	395.244	0.347113	0.126346	2.74733	0.00600829	0.00600068	0.251493
Rv0650	58.4979	1.9643	0.519191	3.78338	0.000154713	0.000246919	1.38053
Rv0653c	1779.45	-0.200217	0.0687359	-2.91284	0.00358158	0.00384626	-0.177614
Rv0654	1797.11	-0.111723	0.108201	-1.03255	0.301814	0.148961	-0.0844449
Rv0658c	1013.99	-0.0371952	0.067015	-0.555027	0.578876	0.245885	-0.0329177
Rv0666	74.0979	-0.0266488	0.19407	-0.137315	0.890782	0.335203	-0.0134344
Rv0669c	2228.96	-0.0883841	0.0420724	-2.10076	0.0356621	0.0262757	-0.0840697
Rv0674	509.178	0.105345	0.0855575	1.23128	0.218219	0.116825	0.0873784
Rv0678	18236.4	-0.340343	0.0712692	-4.77546	1.79297e-06	4.60602e-06	-0.304139
Rv0679c	14105	-0.651279	0.0760568	-8.56307	1.09904e-17	1.37731e-16	-0.614687
Rv0680c	2531.37	-0.584111	0.071925	-8.12111	4.61945e-16	4.78952e-15	-0.545905
Rv0681	2316.56	0.0221032	0.0785779	0.28129	0.778488	0.304626	0.0187731
Rv0686	3384.32	-0.356266	0.0503746	-7.07234	1.52347e-12	1.03079e-11	-0.33689
Rv0687	1079.88	-0.0865797	0.0862698	-1.00359	0.315575	0.153816	-0.0715443
Rv0688	2998.2	0.0146029	0.0693168	0.210668	0.833146	0.318828	0.0128198
Rv0689c	89.2255	0.186744	0.153408	1.2173	0.223489	0.118851	0.115623
Rv0690c	2087.06	-0.0450301	0.0619952	-0.726348	0.467626	0.20897	-0.0405142
Rv0691A	122.592	0.186535	0.153764	1.21312	0.225082	0.119434	0.115296
Rv0691c	915.923	-0.223068	0.0978461	-2.27978	0.0226208	0.0180113	-0.178188
Rv0692	1510.34	-0.182315	0.0856407	-2.12883	0.033268	0.0249194	-0.152082
Rv0695	2551.37	0.618998	0.0961094	6.44055	1.19039e-10	6.35392e-10	0.553494
Rv0696	4960.02	0.736858	0.0877625	8.39604	4.61775e-17	5.28173e-16	0.698776
Rv0697	1939.03	0.724185	0.101235	7.15351	8.45882e-13	5.91778e-12	0.668436
Rv0698	698.183	0.162594	0.284743	0.571021	0.567986	0.242898	0.0548574
Rv0712	1904.86	0.21703	0.057363	3.78345	0.000154666	0.000246919	0.199542
Rv0713	5134.66	-0.0547228	0.037666	-1.45284	0.146267	0.0840801	-0.0525351
Rv0725c	582.454	-0.462177	0.0777636	-5.94336	2.79247e-09	1.24958e-08	-0.413743
Rv0726c	2023.98	-0.191419	0.0431445	-4.43669	9.13509e-06	2.02231e-05	-0.182173
Rv0730	2269.61	0.191437	0.042291	4.52666	5.99233e-06	1.37675e-05	0.182534
Rv0731c	864.597	0.292457	0.0750762	3.89546	9.80106e-05	0.000165205	0.256575
Rv0737	203.963	0.202182	0.170549	1.18547	0.23583	0.12393	0.115606
Rv0738	347.553	0.559454	0.153211	3.65153	0.000260679	0.000392975	0.392255
Rv0739	350.575	-0.0947646	0.114327	-0.828891	0.407166	0.188984	-0.069647
Rv0740	2714.67	-0.102659	0.0452833	-2.26703	0.0233882	0.01852	-0.0969371
Rv0741	2326.74	-0.0395263	0.0544424	-0.72602	0.467826	0.208974	-0.0363807
Rv0743c	799.708	-0.0427218	0.0706677	-0.604545	0.545481	0.23584	-0.0373442
Rv0744c	640.856	0.478676	0.180269	2.65534	0.00792277	0.00756666	0.282587
Rv0745	38.2757	0.370354	0.228822	1.61852	0.10555	0.0642381	0.166294
Rv0749A	326.184	-0.249203	0.120951	-2.06037	0.0393634	0.0286079	-0.181089
Rv0750	1573.22	-0.0528805	0.0434573	-1.21684	0.223666	0.118858	-0.0501094
Rv0755A	1655.62	-0.184387	0.0830014	-2.22149	0.026318	0.0204247	-0.155379
Rv0756c	1737.09	0.303493	0.0563586	5.38503	7.24313e-08	2.49131e-07	0.281682
Rv0759c	2573.29	-0.0426547	0.0523495	-0.814806	0.415183	0.191289	-0.0394949
Rv0760c	2874.9	0.0392061	0.0508756	0.770628	0.440928	0.200585	0.036448
Rv0762c	976.137	0.14831	0.121019	1.22551	0.220384	0.117585	0.106255
Rv0763c	229.795	-0.12837	0.151184	-0.849098	0.395827	0.184494	-0.0797951
Rv0765c	1013.63	0.107047	0.119735	0.894037	0.371302	0.175619	0.0768602
Rv0767c	641.205	0.360464	0.131551	2.74011	0.00614193	0.0061172	0.25608
Rv0769	762.828	0.129379	0.110119	1.1749	0.240034	0.125368	0.0971128
Rv0770	430.244	0.190134	0.11907	1.59682	0.110305	0.0665418	0.138085
Rv0771	286.877	0.0320348	0.121829	0.26295	0.792589	0.308219	0.0227033
Rv0774c	1202.99	0.16254	0.0638394	2.54608	0.0108939	0.00988663	0.146069
Rv0775	846.07	0.0337012	0.0641657	0.525221	0.599429	0.252066	0.0301058
Rv0776c	254.419	0.0445454	0.0922131	0.48307	0.629046	0.261107	0.0358929
Rv0779c	229.608	0.0412207	0.107463	0.38358	0.70129	0.281526	0.0311469
Rv0784	356.828	0.122176	0.104027	1.17447	0.240208	0.125382	0.0940927
Rv0785	1562.59	-0.0190028	0.0649893	-0.292399	0.769982	0.302224	-0.0169272
Rv0786c	537.81	-0.0511683	0.0773574	-0.661453	0.508322	0.223552	-0.043679
Rv0787	1216.15	0.346066	0.0838661	4.1264	3.68479e-05	7.01509e-05	0.297116
Rv0787A	911.83	0.210458	0.0729889	2.88342	0.00393377	0.00415938	0.184246
Rv0789c	1413.75	0.14633	0.139365	1.04998	0.293728	0.145669	0.096335
Rv0790c	1894.62	0.0994036	0.350338	0.283736	0.776613	0.304057	0.0256817
Rv0791c	2234.94	-0.0308371	0.323999	-0.0951764	0.924175	0.344872	-0.00880168
Rv0792c	2653.67	-0.362401	0.300292	-1.20683	0.227498	0.120494	-0.118011
Rv0793	161.678	-0.289474	0.224927	-1.28697	0.198104	0.107899	-0.129824
Rv0794c	704.522	0.157352	0.0691838	2.27441	0.0229415	0.0182163	0.138936
Rv0795	1506.47	0.154329	0.324077	0.47621	0.633925	0.261625	0.0442796
Rv0796	7017.61	-0.139294	0.0827009	-1.68431	0.0921209	0.0575975	-0.117066
Rv0797	1465.09	0.15143	0.160962	0.940783	0.346816	0.165744	0.0900617
Rv0799c	2073.49	-0.236477	0.0662594	-3.56896	0.000358399	0.000524381	-0.212108
Rv0801	538.92	0.0437489	0.09151	0.478078	0.632595	0.261625	0.0353509
Rv0802c	876.75	0.00791296	0.0697654	0.113422	0.909696	0.340262	0.00693583
Rv0804	507.916	0.383986	0.0779601	4.92541	8.41832e-07	2.36036e-06	0.338381
Rv0805	12891.7	-0.317238	0.0626785	-5.06135	4.16289e-07	1.23611e-06	-0.289874
Rv0807	270.162	0.69786	0.123442	5.65332	1.57377e-08	6.28275e-08	0.601823
Rv0810c	6326.13	-0.111492	0.0945727	-1.1789	0.238437	0.12482	-0.0892524
Rv0811c	2175.73	0.188364	0.0605256	3.11213	0.00185744	0.00219479	0.17128
Rv0812	1291.13	0.0604373	0.0591061	1.02252	0.306534	0.150364	0.0548834
Rv0813c	1711.49	-0.00242514	0.109545	-0.0221384	0.982338	0.357731	-0.00181491
Rv0817c	404.128	-0.235136	0.173366	-1.3563	0.175003	0.0977176	-0.133347
Rv0818	3690.07	0.0908447	0.0678651	1.33861	0.180699	0.100431	0.080285
Rv0822c	7235.28	-0.413128	0.0613831	-6.73032	1.6929e-11	1.02511e-10	-0.383027
Rv0823c	20820.4	-0.528137	0.0788837	-6.69514	2.15467e-11	1.28316e-10	-0.478849
Rv0825c	1099.02	-0.404675	0.0788951	-5.12928	2.90859e-07	8.86213e-07	-0.356904
Rv0826	633.368	-0.178979	0.0887533	-2.01658	0.0437389	0.0313142	-0.147473
Rv0828c	48.5986	-0.29719	0.269812	-1.10147	0.270692	0.137123	-0.108891
Rv0829	561.11	-0.413735	0.108288	-3.82067	0.000133088	0.000216089	-0.329474
Rv0830	2826.53	-0.406344	0.0541206	-7.50811	5.99854e-14	4.82958e-13	-0.382826
Rv0831c	10850.7	-0.390576	0.0393078	-9.93635	2.89224e-23	6.12972e-22	-0.378116
Rv0836c	481.775	0.279514	0.166742	1.67633	0.0936737	0.0581584	0.165028
Rv0837c	848.339	-0.110282	0.111411	-0.989871	0.322237	0.155996	-0.0821881
Rv0839	1629.35	0.183149	0.0478748	3.82557	0.000130467	0.000212459	0.17232
Rv0841	262.201	-0.380449	0.120261	-3.16353	0.00155866	0.00187974	-0.285636
Rv0842	3093.97	-0.105736	0.141899	-0.745145	0.456184	0.205258	-0.068539
Rv0843	572.614	0.154716	0.102476	1.50978	0.1311	0.0767728	0.120281
Rv0845	1048.25	-0.299056	0.0744662	-4.01599	5.91966e-05	0.000106375	-0.263114
Rv0846c	1933.46	-0.506263	0.111689	-4.53281	5.82055e-06	1.34215e-05	-0.410681
Rv0849	1194.59	0.151129	0.172601	0.875596	0.38125	0.179382	0.0850223
Rv0850	423.745	0.146081	0.14802	0.986896	0.323694	0.15655	0.0923334
Rv0851c	1008.62	0.205833	0.0979388	2.10165	0.0355842	0.0262451	0.163992
Rv0854	1082.01	-0.0846025	0.0496664	-1.70342	0.0884903	0.0557873	-0.0789683
Rv0856	1738.55	-0.198003	0.052158	-3.79621	0.000146928	0.000236855	-0.184418
Rv0857	2071.8	-0.146913	0.0572633	-2.56558	0.0103004	0.00939538	-0.134558
Rv0862c	957.42	0.34149	0.0576879	5.91962	3.22695e-09	1.4222e-08	0.31698
Rv0863	2502.62	0.030221	0.0731569	0.413099	0.679534	0.276022	0.0261816
Rv0870c	2487.39	-0.0880851	0.0493003	-1.78671	0.0739851	0.0480944	-0.082305
Rv0874c	1098.99	-0.103316	0.0680946	-1.51725	0.129205	0.0757553	-0.0912835
Rv0875c	1047.95	-0.0850585	0.0732288	-1.16154	0.24542	0.127433	-0.0737792
Rv0876c	3763.82	-0.135156	0.0533073	-2.53541	0.0112317	0.0101167	-0.125118
Rv0877	3488.04	0.232405	0.0796211	2.91888	0.00351288	0.00379227	0.199274
Rv0879c	526.59	0.551717	0.0952179	5.79425	6.86258e-09	2.88343e-08	0.481598
Rv0880	286.183	-0.149723	0.102034	-1.46738	0.142273	0.0821477	-0.116561
Rv0881	532.13	-0.0681286	0.0642297	-1.0607	0.288825	0.143868	-0.0608901
Rv0882	316.66	-0.100771	0.0948736	-1.06216	0.288164	0.143701	-0.0805159
Rv0883c	2276.62	-0.24346	0.0504581	-4.82499	1.40008e-06	3.68878e-06	-0.228342
Rv0885	5651.14	-0.110417	0.0475694	-2.32117	0.0202778	0.0164287	-0.103693
Rv0887c	222.693	-0.197087	0.114654	-1.71897	0.0856194	0.05431	-0.146096
Rv0888	6352.93	-0.344515	0.0448978	-7.67332	1.67606e-14	1.41257e-13	-0.329256
Rv0890c	3521.19	0.349105	0.0428935	8.13887	3.98974e-16	4.1666e-15	0.33504
Rv0891c	1403.88	0.0863365	0.122094	0.707131	0.479485	0.213278	0.0612487
Rv0892	2683.48	0.26246	0.0588531	4.45958	8.21218e-06	1.82924e-05	0.241139
Rv0893c	660.344	-0.0655606	0.0785581	-0.834549	0.403972	0.187804	-0.0557409
Rv0894	767.137	-0.0595553	0.144818	-0.411243	0.680894	0.276341	-0.0379757
Rv0895	254.255	0.258179	0.13408	1.92555	0.0541601	0.037204	0.177058
Rv0897c	2034.9	0.000966308	0.0496168	0.0194754	0.984462	0.357916	0.000901193
Rv0898c	1067.11	0.0402328	0.0926378	0.434301	0.66407	0.27127	0.0323586
Rv0900	394.241	-0.101631	0.0903246	-1.12517	0.260517	0.133422	-0.0827144
Rv0901	797.744	0.28027	0.079381	3.5307	0.000414468	0.000592959	0.241944
Rv0906	1401.06	0.23451	0.0578975	4.05044	5.11218e-05	9.3142e-05	0.21556
Rv0907	1452.77	-0.00489681	0.0690727	-0.0708935	0.943483	0.349235	-0.00430231
Rv0909	1230.49	-0.0184128	0.0933475	-0.19725	0.843632	0.322072	-0.0147608
Rv0910	3128.14	-0.197002	0.0488848	-4.02992	5.57948e-05	0.000101018	-0.185013
Rv0911	1427.37	-0.0732839	0.0625148	-1.17227	0.241091	0.12557	-0.065868
Rv0912	557.963	-0.0981398	0.0769336	-1.27564	0.202081	0.109651	-0.0840508
Rv0913c	3209.7	-0.118635	0.0760914	-1.55912	0.118969	0.0707614	-0.102024
Rv0914c	1440.92	0.320715	0.0540438	5.93434	2.95023e-09	1.31228e-08	0.299835
Rv0918	292.003	0.0294045	0.114575	0.25664	0.797457	0.309277	0.0215284
Rv0919	2257.96	-0.196683	0.0777946	-2.52823	0.0114639	0.0103002	-0.169116
Rv0920c	1227.02	0.130703	0.0740752	1.76447	0.0776534	0.0501173	0.113293
Rv0921	771.061	0.190018	0.384086	0.494726	0.620793	0.258351	0.0436303
Rv0922	6313.15	0.156413	0.0751338	2.0818	0.0373609	0.0273457	0.135306
Rv0923c	2166.45	0.224179	0.0790178	2.83707	0.0045529	0.00474098	0.192459
Rv0925c	2263.75	-0.239472	0.0524541	-4.56537	4.98622e-06	1.16278e-05	-0.223423
Rv0926c	1044.27	-0.0049346	0.0712151	-0.0692914	0.944758	0.349476	-0.0043035
Rv0927c	411.356	0.20161	0.108933	1.85078	0.0642019	0.042757	0.153306
Rv0939	4267.96	0.261637	0.0526659	4.96786	6.76953e-07	1.92808e-06	0.244334
Rv0940c	1913.77	-0.372234	0.0717427	-5.18846	2.12037e-07	6.6431e-07	-0.333677
Rv0941c	2088.4	-0.285214	0.0807852	-3.53053	0.000414734	0.000592959	-0.245177
Rv0942	848.913	-0.109425	0.0726912	-1.50534	0.132237	0.0773443	-0.0951981
Rv0943c	236.669	0.606856	0.310826	1.9524	0.0508912	0.035295	0.205614
Rv0944	149.598	0.048766	0.208361	0.234045	0.81495	0.313614	0.0229978
Rv0945	1065.33	0.153851	0.0605507	2.54086	0.0110579	0.00999774	0.139597
Rv0947c	463.346	-0.302572	0.0852111	-3.55085	0.000383995	0.000556184	-0.2567
Rv0948c	3174.83	-0.196243	0.053063	-3.6983	0.000217046	0.000334905	-0.182325
Rv0950c	5969.24	-0.722113	0.0892999	-8.08639	6.14609e-16	6.10868e-15	-0.680351
Rv0953c	327.241	0.302078	0.115644	2.61213	0.00899806	0.00837711	0.226968
Rv0954	7878.83	0.0847845	0.0845617	1.00263	0.316037	0.153925	0.0705207
Rv0955	3067.92	0.224993	0.0899795	2.50049	0.0124021	0.0109924	0.185466
Rv0958	1371.42	0.323786	0.0623298	5.19472	2.05028e-07	6.46566e-07	0.296348
Rv0959	1571.64	0.326977	0.0643678	5.07982	3.77785e-07	1.13428e-06	0.297676
Rv0961	1381.55	-0.219248	0.0920284	-2.3824	0.0172004	0.0143205	-0.179164
Rv0963c	230.173	-0.0674231	0.230758	-0.292182	0.770148	0.302224	-0.0286854
Rv0964c	206.721	0.105619	0.17634	0.598953	0.549204	0.236976	0.0581312
Rv0965c	805.005	0.0722851	0.0649415	1.11308	0.265674	0.135199	0.0644631
Rv0966c	1665.15	0.053001	0.0713677	0.742647	0.457696	0.205745	0.0462271
Rv0968	3633.3	-1.33205	0.134558	-9.89944	4.18609e-23	8.49701e-22	-1.3112
Rv0970	1985.45	-0.270208	0.116792	-2.31359	0.0206901	0.0166861	-0.200748
Rv0976c	445.106	0.14644	0.088725	1.65049	0.0988428	0.0607202	0.120319
Rv0979c	50.8443	0.172916	0.235209	0.735162	0.462241	0.207207	0.0726512
Rv0986	842.642	-0.423852	0.0849255	-4.99086	6.01099e-07	1.72912e-06	-0.368171
Rv0987	3751.62	-0.251057	0.0725298	-3.46144	0.000537298	0.000741705	-0.221028
Rv0988	2552.71	-0.143554	0.0663084	-2.16495	0.0303917	0.0230161	-0.127848
Rv0990c	1310.71	-1.02692	0.126774	-8.10038	5.47863e-16	5.52144e-15	-0.988914
Rv0991c	3372.08	-1.20691	0.116006	-10.4039	2.37909e-25	5.81133e-24	-1.18679
Rv0992c	424.927	0.220402	0.120504	1.829	0.0673989	0.0446041	0.159727
Rv0996	4424.95	-0.472315	0.067257	-7.02254	2.17863e-12	1.44027e-11	-0.435538
Rv0997	1624.85	-0.134537	0.0734986	-1.83046	0.0671806	0.0445145	-0.116879
Rv0998	1977.53	0.212701	0.07547	2.81835	0.00482706	0.00498326	0.184674
Rv0999	1137.75	0.0537401	0.0764016	0.703389	0.481813	0.214049	0.0460382
Rv1000c	628.059	0.155369	0.0733027	2.11955	0.034044	0.0252904	0.135257
Rv1002c	1872.79	0.0642455	0.0509113	1.26191	0.206981	0.111679	0.059742
Rv1003	325.841	0.311002	0.169354	1.8364	0.0662991	0.0439505	0.18264
Rv1004c	455.023	0.393126	0.10807	3.63769	0.000275091	0.000413108	0.311545
Rv1006	13580.6	-0.0178314	0.0470446	-0.379032	0.704664	0.282566	-0.0167429
Rv1012	129.785	0.074371	0.13388	0.555503	0.578551	0.245884	0.0499478
Rv1019	2030.9	-0.0468087	0.0506565	-0.924042	0.355465	0.169127	-0.0435457
Rv1021	2025.86	-0.0705266	0.0459468	-1.53496	0.124793	0.0737081	-0.0664433
Rv1024	571.465	0.180733	0.0745763	2.42346	0.0153735	0.0130791	0.156949
Rv1025	694.956	0.203468	0.0666403	3.05323	0.00226393	0.0025874	0.181767
Rv1026	726.62	0.244519	0.0752761	3.2483	0.00116097	0.00145746	0.213148
Rv1035c	231.99	-0.128589	0.121438	-1.05889	0.289652	0.144044	-0.0917803
Rv1036c	128.579	0.169717	0.219491	0.773232	0.439385	0.200199	0.0766372
Rv1041c	1464.34	-0.237085	0.10535	-2.25044	0.024421	0.0191902	-0.183971
Rv1042c	518.082	-0.0343221	0.088497	-0.387834	0.698139	0.280525	-0.0280645
Rv1043c	2132.7	0.0505144	0.0709069	0.712404	0.476214	0.21202	0.0441265
Rv1044	327.262	0.0231852	0.120343	0.19266	0.847225	0.323085	0.0165397
Rv1045	1302.42	-0.299346	0.100316	-2.98404	0.00284469	0.00316579	-0.239632
Rv1046c	3869.62	-0.515581	0.106828	-4.82629	1.39097e-06	3.67638e-06	-0.427288
Rv1047	15954.1	-0.253628	0.0903505	-2.80715	0.00499817	0.00513416	-0.20957
Rv1048c	938.1	-0.283952	0.128521	-2.20938	0.0271483	0.0209788	-0.200762
Rv1049	238.293	0.113872	0.137811	0.826292	0.408639	0.189241	0.0752869
Rv1050	158.039	0.230271	0.237393	0.970001	0.332046	0.159992	0.0964924
Rv1051c	82.8374	0.00884705	0.418898	0.0211198	0.98315	0.357891	0.00178884
Rv1052	549.263	-0.314526	0.0977564	-3.21745	0.00129337	0.00158836	-0.25507
Rv1053c	391.042	-0.288702	0.107127	-2.69493	0.00704024	0.00684629	-0.224314
Rv1054	1116.04	0.0538542	0.064311	0.837403	0.402366	0.187179	0.048103
Rv1055	333.411	0.109388	0.0858481	1.27421	0.202591	0.109763	0.0906514
Rv1056	868.101	-0.0702295	0.0597824	-1.17475	0.240094	0.125368	-0.0636584
Rv1057	396.262	-0.557654	0.165109	-3.3775	0.000731482	0.000971524	-0.369617
Rv1059	1402.86	-0.0509661	0.0686158	-0.742774	0.457618	0.205745	-0.0448735
Rv1060	1835.99	-0.192116	0.0588775	-3.26297	0.00110251	0.00139255	-0.175583
Rv1061	962.464	-0.0649259	0.0660693	-0.982695	0.325758	0.15733	-0.0576745
Rv1062	413.641	0.0452724	0.0938971	0.482149	0.6297	0.261228	0.03623
Rv1063c	962.023	0.0168766	0.0678284	0.248813	0.803506	0.310703	0.0148915
Rv1065	4853.94	0.00447837	0.0837173	0.0534939	0.957338	0.351663	0.00372986
Rv1066	360.194	0.370053	0.156848	2.35931	0.0183087	0.0151036	0.234466
Rv1069c	2572.77	0.0951488	0.0514691	1.84866	0.0645069	0.0428857	0.0884073
Rv1072	60994.4	-0.21954	0.0776178	-2.82848	0.00467701	0.00484571	-0.189318
Rv1073	13757.2	-0.390711	0.0758361	-5.15205	2.57658e-07	7.90065e-07	-0.346979
Rv1075c	321.11	0.11734	0.0930579	1.26093	0.207333	0.111827	0.094551
Rv1081c	371.214	0.0762745	0.10375	0.735175	0.462233	0.207207	0.0586413
Rv1083	876.681	0.0607675	0.0804146	0.755678	0.449842	0.203293	0.0513013
Rv1084	1239.55	0.284664	0.0627774	4.5345	5.77389e-06	1.33566e-05	0.259178
Rv1085c	1063.16	0.139275	0.068325	2.03841	0.0415086	0.0299106	0.123186
Rv1086	2165.72	0.00307719	0.0590013	0.0521547	0.958405	0.351905	0.0027935
Rv1087A	99.4473	0.0888848	0.200212	0.443953	0.657077	0.269312	0.0436313
Rv1096	3132.36	-0.228162	0.044613	-5.11426	3.14966e-07	9.55623e-07	-0.216775
Rv1097c	3777.34	0.0139727	0.0506771	0.27572	0.782763	0.305469	0.0129942
Rv1100	1464.69	0.188946	0.0649328	2.90987	0.00361578	0.00387432	0.169518
Rv1101c	4938.42	-0.357944	0.0657161	-5.44682	5.12784e-08	1.81734e-07	-0.325835
Rv1104	1118.77	0.0426734	0.05692	0.749708	0.453431	0.204466	0.0389956
Rv1105	234.467	-0.371289	0.135952	-2.73103	0.00631358	0.00625756	-0.259378
Rv1106c	2144.09	-0.00371552	0.0406242	-0.0914607	0.927126	0.345629	-0.00354304
Rv1109c	6001.41	-0.027564	0.0455709	-0.604861	0.545271	0.23584	-0.0259793
Rv1111c	2204.02	-0.0236697	0.0591087	-0.400444	0.688829	0.278463	-0.0214826
Rv1112	376.774	-0.0465794	0.136142	-0.342139	0.732246	0.291035	-0.0309192
Rv1115	351.927	-0.154193	0.103432	-1.49076	0.136024	0.0793017	-0.119385
Rv1116	359.312	0.0457392	0.100312	0.45597	0.648412	0.266688	0.0356407
Rv1116A	508.574	0.0422251	0.0773912	0.545606	0.585337	0.247818	0.0360329
Rv1117	2057.34	0.0734217	0.0648558	1.13208	0.257602	0.132258	0.0654973
Rv1118c	1576.99	0.0297041	0.0483628	0.614192	0.539088	0.23359	0.0277978
Rv1119c	192.864	0.0366748	0.126239	0.290518	0.77142	0.302435	0.0254773
Rv1120c	130.688	0.0127998	0.233012	0.0549322	0.956192	0.351541	0.00538289
Rv1125	711.38	-0.164587	0.062682	-2.62575	0.00864578	0.00810626	-0.148461
Rv1126c	856.103	-0.0037798	0.0544904	-0.0693664	0.944698	0.349476	-0.00347767
Rv1128c	494.203	-0.495308	0.118771	-4.17028	3.0423e-05	5.92497e-05	-0.389244
Rv1129c	223.393	0.167324	0.276231	0.605738	0.544688	0.235662	0.0585686
Rv1132	4750.46	0.367352	0.0653901	5.61785	1.93347e-08	7.57192e-08	0.335099
Rv1134	45.9253	0.30866	0.221091	1.39607	0.162692	0.091948	0.14151
Rv1136	101.859	0.238371	0.168812	1.41205	0.157935	0.0897524	0.138239
Rv1137c	198.773	0.178589	0.159738	1.11801	0.263561	0.134579	0.107179
Rv1138c	656.903	0.298899	0.0608257	4.91402	8.92265e-07	2.48245e-06	0.274016
Rv1139c	611.398	0.2398	0.0742659	3.22894	0.0012425	0.00153705	0.209644
Rv1140	2667.76	0.0148955	0.0591763	0.251714	0.801262	0.310369	0.0135155
Rv1144	3035.88	0.764197	0.0774927	9.86153	6.11084e-23	1.22316e-21	0.738322
Rv1147	963.841	0.238254	0.0699802	3.40459	0.000662644	0.000889185	0.211231
Rv1148c	2839.61	-0.143373	0.127621	-1.12343	0.261256	0.1337	-0.0996332
Rv1149	4178.4	0.0168068	0.0500716	0.335656	0.73713	0.292654	0.0156558
Rv1150	1462.26	-0.235243	0.106008	-2.21911	0.0264793	0.0205389	-0.181987
Rv1151c	530.276	0.0381646	0.0732834	0.520782	0.602519	0.252864	0.0330528
Rv1152	604.786	0.259235	0.131621	1.96957	0.0488882	0.0342354	0.179838
Rv1154c	575.374	0.0272453	0.0760139	0.358425	0.720025	0.287446	0.0233613
Rv1155	2365.83	0.121405	0.0675613	1.79695	0.0723429	0.0472186	0.107548
Rv1156	8660.01	-0.0816067	0.0455791	-1.79044	0.0733833	0.0477894	-0.0769674
Rv1157c	3888.91	-0.202361	0.064814	-3.12218	0.00179518	0.00213462	-0.181803
Rv1158c	859.161	0.130314	0.0907735	1.4356	0.151116	0.0865255	0.106072
Rv1159A	1582.92	-0.0179314	0.07633	-0.234919	0.814272	0.313604	-0.0153558
Rv1167c	1809.61	0.173839	0.0910248	1.90979	0.0561598	0.0383038	0.141895
Rv1171	4376.16	0.0498308	0.0600609	0.829671	0.406725	0.188841	0.0451096
Rv1176c	393.879	-0.256477	0.106265	-2.41356	0.0157975	0.0133765	-0.198865
Rv1178	5150.1	0.083742	0.0814023	1.02874	0.303601	0.149536	0.0704951
Rv1179c	6750.44	0.222995	0.0586618	3.80136	0.000143904	0.000232762	0.204362
Rv1184c	21739.4	-0.0496936	0.0614793	-0.808299	0.418918	0.192702	-0.0447867
Rv1186c	2303.94	0.181975	0.0491691	3.701	0.000214751	0.000331719	0.170657
Rv1188	317.205	0.0502461	0.0923687	0.543974	0.58646	0.248095	0.0404672
Rv1190	226.25	0.0333912	0.10751	0.310587	0.756115	0.298382	0.0252209
Rv1191	631.838	0.0453031	0.0641295	0.706431	0.47992	0.213406	0.0404821
Rv1192	4519.01	0.0763204	0.0787643	0.968972	0.332559	0.160186	0.0648645
Rv1194c	6257.95	-0.395497	0.0445129	-8.885	6.39233e-19	9.69733e-18	-0.37954
Rv1199c	16252.8	-0.24947	0.0903381	-2.76151	0.00575339	0.00578621	-0.206025
Rv1200	4214.96	-0.180086	0.0633381	-2.84325	0.00446559	0.00466017	-0.162273
Rv1203c	214.623	0.159383	0.102775	1.5508	0.120949	0.0717316	0.123811
Rv1204c	972.959	0.235863	0.0602252	3.91634	8.99023e-05	0.00015315	0.2154
Rv1205	1161.1	-0.0054965	0.097453	-0.0564016	0.955022	0.351507	-0.00433188
Rv1209	729.201	0.225612	0.114324	1.97344	0.0484453	0.0340078	0.168164
Rv1211	6039.55	-0.0619373	0.0369419	-1.67661	0.0936182	0.0581584	-0.0595552
Rv1215c	3517.38	0.229816	0.0862754	2.66375	0.00772742	0.00741448	0.192252
Rv1216c	9059.25	0.280148	0.0850669	3.29327	0.000990306	0.0012675	0.237
Rv1217c	10834	0.801275	0.070274	11.4022	4.07894e-30	1.27793e-28	0.782996
Rv1218c	13141.2	0.341201	0.0753799	4.52642	5.99925e-06	1.37675e-05	0.301067
Rv1219c	7894.95	0.193434	0.0918142	2.1068	0.0351353	0.0259805	0.157722
Rv1220c	621.31	0.305057	0.0792808	3.84781	0.000119179	0.000195623	0.264338
Rv1225c	1890.21	0.173562	0.0550497	3.15282	0.00161703	0.00194039	0.160185
Rv1226c	451.156	0.285873	0.119177	2.39873	0.0164522	0.0137772	0.210812
Rv1227c	182.976	0.363051	0.136244	2.66471	0.00770553	0.0073984	0.25268
Rv1230c	3433.59	0.283183	0.0552539	5.12512	2.97343e-07	9.04055e-07	0.263137
Rv1231c	917.642	0.222285	0.0621563	3.57623	0.000348589	0.000512108	0.20164
Rv1232c	2456.35	0.225293	0.0769462	2.92793	0.00341222	0.0037086	0.194855
Rv1233c	3321.45	0.14229	0.0579403	2.45581	0.0140567	0.0121597	0.130038
Rv1234	2340.76	0.0714832	0.0718061	0.995504	0.319491	0.155031	0.0622843
Rv1245c	2371.44	-0.0272205	0.0451622	-0.602728	0.54669	0.236173	-0.0256815
Rv1248c	15302.3	0.00805455	0.0472365	0.170515	0.864605	0.327821	0.00755889
Rv1249c	1977.02	0.123137	0.0717401	1.71644	0.086082	0.0544836	0.10756
Rv1250	1310.54	0.0461633	0.0631556	0.730946	0.464812	0.207907	0.0413813
Rv1251c	2070.54	0.0204964	0.055943	0.366379	0.714082	0.285628	0.0187797
Rv1254	2226.62	0.0490016	0.0537569	0.91154	0.362011	0.171845	0.0451964
Rv1255c	797.458	0.195104	0.08912	2.18923	0.0285802	0.0218626	0.1608
Rv1257c	2630.07	0.0289896	0.0513486	0.564565	0.57237	0.24439	0.0269127
Rv1258c	767.252	-1.30178	0.0636268	-20.4597	4.92836e-93	1.18377e-90	-1.29728
Rv1260	2853.7	-0.204518	0.0371934	-5.49878	3.82425e-08	1.39529e-07	-0.197158
Rv1261c	1934.96	-0.0711797	0.0473067	-1.50464	0.132416	0.0774177	-0.0668298
Rv1262c	719.918	0.0539201	0.081885	0.658486	0.510226	0.224116	0.045259
Rv1264	3955.88	0.178072	0.0689078	2.58421	0.00976014	0.00897069	0.157606
Rv1265	3347.97	-0.224044	0.0563011	-3.97939	6.90913e-05	0.000122611	-0.206697
Rv1268c	307.59	0.131314	0.120137	1.09304	0.274377	0.138746	0.0942995
Rv1269c	1048.33	0.186769	0.0717522	2.60298	0.00924174	0.00856524	0.163853
Rv1271c	1771.95	0.0601013	0.0586435	1.02486	0.30543	0.150185	0.0546547
Rv1272c	2805.34	0.0385403	0.0431694	0.89277	0.371981	0.175802	0.0365405
Rv1273c	1139.1	-0.0351429	0.0623651	-0.563502	0.573093	0.244502	-0.0315767
Rv1276c	309.506	0.0481903	0.101359	0.475441	0.634473	0.261702	0.0373874
Rv1277	1356.17	-0.817293	0.0488058	-16.7458	6.073e-63	9.72473e-61	-0.809331
Rv1278	1505.83	-0.229016	0.05246	-4.36553	1.26814e-05	2.73185e-05	-0.213523
Rv1279	2773.12	-0.15462	0.0411137	-3.76079	0.000169376	0.000268243	-0.147627
Rv1287	1447.91	0.104869	0.146145	0.717567	0.473024	0.210925	0.0666283
Rv1288	1074.94	0.0877179	0.093443	0.938732	0.347869	0.166171	0.0704456
Rv1289	1146.01	-0.141427	0.0931149	-1.51884	0.128802	0.0755805	-0.114142
Rv1290c	912.554	0.051601	0.064573	0.799111	0.424226	0.194584	0.0460489
Rv1291c	81.6941	0.212274	0.173765	1.22161	0.221853	0.118112	0.119704
Rv1301	3176.38	0.0564877	0.064407	0.877043	0.380463	0.179187	0.0504424
Rv1303	4574.36	-0.59675	0.0967619	-6.1672	6.95098e-10	3.44246e-09	-0.527804
Rv1312	2378.43	-0.169158	0.0588137	-2.87617	0.00402532	0.00423754	-0.154414
Rv1313c	6929.28	-0.0879817	0.0392043	-2.24418	0.0248206	0.0194512	-0.0842233
Rv1314c	686.597	-0.0568628	0.0680898	-0.835115	0.403653	0.187717	-0.0501616
Rv1318c	1553.61	-0.242698	0.0447254	-5.42641	5.74997e-08	2.01623e-07	-0.230691
Rv1319c	2194.32	-0.19289	0.0491531	-3.92426	8.69964e-05	0.000149239	-0.180994
Rv1320c	4985.11	-0.263341	0.0379881	-6.93219	4.14368e-12	2.63073e-11	-0.254015
Rv1321	2530.05	-0.0326001	0.0424315	-0.768299	0.442309	0.201015	-0.0309609
Rv1322	2243.38	-0.111154	0.0810781	-1.37095	0.170391	0.0954754	-0.0938151
Rv1322A	25859	0.139515	0.0604521	2.30786	0.021007	0.0169092	0.126532
Rv1324	7690.62	0.000806853	0.0604419	0.0133492	0.989349	0.359019	0.000729214
Rv1331	2717.04	0.0252575	0.110968	0.227611	0.819949	0.314962	0.0187882
Rv1332	6113.18	-0.167756	0.0531225	-3.15792	0.00158899	0.00191153	-0.155602
Rv1333	1807.37	0.402833	0.0734394	5.48524	4.12904e-08	1.49891e-07	0.361048
Rv1337	4948.99	0.11721	0.060445	1.93912	0.0524868	0.0362447	0.106196
Rv1339	4331.82	-0.112176	0.0466158	-2.40639	0.0161111	0.0135744	-0.105602
Rv1341	1172.1	0.108031	0.0636447	1.6974	0.0896203	0.056401	0.0968677
Rv1342c	779.091	-0.265879	0.0667401	-3.9838	6.78212e-05	0.000120669	-0.238799
Rv1351	564.482	-0.241929	0.0855133	-2.82914	0.00466735	0.00483918	-0.20327
Rv1352	2222.72	0.0823914	0.0757219	1.08808	0.276561	0.13964	0.0708247
Rv1353c	495.557	-0.0317522	0.0755367	-0.420354	0.674227	0.274253	-0.0272747
Rv1354c	1721.5	-0.143195	0.0530998	-2.69673	0.0070025	0.0068142	-0.13268
Rv1356c	802.835	-0.452705	0.151751	-2.98321	0.0028524	0.00317191	-0.302651
Rv1357c	864.301	-0.448115	0.0878036	-5.10361	3.33243e-07	1.00684e-06	-0.387827
Rv1358	1167.32	-0.0448089	0.14049	-0.318948	0.749766	0.296608	-0.0291439
Rv1359	1398.77	-0.162832	0.0682384	-2.38623	0.0170221	0.0141966	-0.144279
Rv1360	4123.21	-0.144158	0.04364	-3.30335	0.000955365	0.00122933	-0.136813
Rv1362c	1628.52	-0.149995	0.0601297	-2.49452	0.0126129	0.0111449	-0.136242
Rv1363c	1561.8	-0.188937	0.0714552	-2.64413	0.00819007	0.00777045	-0.16595
Rv1364c	3836.45	0.0528798	0.049683	1.06434	0.287173	0.143305	0.0493266
Rv1366	509.955	-0.12715	0.0816844	-1.5566	0.119566	0.0710577	-0.107178
Rv1366A	683.809	0.0635833	0.174818	0.363712	0.716073	0.28622	0.035164
Rv1367c	1412.42	0.0316089	0.0481525	0.656432	0.511546	0.224427	0.0295971
Rv1369c	7019.47	-0.1389	0.0827114	-1.67933	0.0930875	0.0580256	-0.116726
Rv1370c	1506.47	0.154329	0.324077	0.47621	0.633925	0.261625	0.0442796
Rv1372	446.018	-0.271873	0.102798	-2.64473	0.00817554	0.00776177	-0.214412
Rv1373	1115.4	-0.331217	0.0615122	-5.38458	7.26156e-08	2.49171e-07	-0.304067
Rv1374c	5082.16	-0.110613	0.0781581	-1.41525	0.156996	0.0892892	-0.0943714
Rv1375	4192.68	0.201867	0.0510309	3.95578	7.62848e-05	0.000133746	0.188606
Rv1376	1340.82	0.0721552	0.0445129	1.621	0.105018	0.0640636	0.0682194
Rv1377c	826.674	-0.0104959	0.0557709	-0.188197	0.850722	0.323835	-0.00962119
Rv1378c	793.84	0.168559	0.120669	1.39687	0.162452	0.0918845	0.12122
Rv1382	201.267	0.358695	0.106261	3.37561	0.000736511	0.000974692	0.283859
Rv1393c	2331.08	0.125388	0.0603157	2.07886	0.0376301	0.0275109	0.11369
Rv1395	490.255	-0.162406	0.0901852	-1.8008	0.0717341	0.0468424	-0.132857
Rv1401	957.623	0.224782	0.082624	2.72055	0.00651742	0.00642458	0.190493
Rv1403c	435.138	-0.166232	0.0925211	-1.79669	0.0723846	0.0472244	-0.134781
Rv1404	2834.37	0.0534782	0.0670337	0.79778	0.424998	0.194814	0.0473399
Rv1405c	955.369	-0.248286	0.0788043	-3.15066	0.00162901	0.00195153	-0.213901
Rv1410c	15163.5	0.141811	0.0718049	1.97495	0.0482737	0.0339369	0.123982
Rv1413	411.673	0.145563	0.0995885	1.46164	0.143839	0.0828855	0.114445
Rv1414	90.6822	0.390389	0.163977	2.38075	0.0172774	0.014368	0.24066
Rv1417	957.669	0.0937294	0.0580556	1.61448	0.106424	0.0645793	0.085463
Rv1419	2115.49	-0.0917922	0.0796206	-1.15287	0.248964	0.128741	-0.0778177
Rv1421	1821.4	0.109576	0.044233	2.47724	0.0132402	0.0115575	0.103748
Rv1422	1545.05	0.289374	0.074163	3.90187	9.54537e-05	0.000161272	0.254534
Rv1424c	1135.22	-0.186503	0.056368	-3.30867	0.00093741	0.00121055	-0.17162
Rv1425	4077.45	0.0450529	0.0381817	1.17996	0.238016	0.124645	0.0432009
Rv1428c	1799.69	-0.1281	0.0509035	-2.51653	0.0118517	0.0106089	-0.119329
Rv1429	702.753	0.0542965	0.136721	0.397135	0.691268	0.27898	0.0359544
Rv1431	1688.78	-0.0134797	0.0923025	-0.146038	0.883891	0.333204	-0.0108517
Rv1432	372.256	0.317915	0.106059	2.99752	0.00272183	0.00304788	0.249537
Rv1433	1894.14	-0.191527	0.0450944	-4.24725	2.16408e-05	4.33169e-05	-0.18147
Rv1434	60.1342	0.190648	0.217998	0.874544	0.381822	0.179593	0.0869029
Rv1435c	2093.6	-0.1102	0.0939842	-1.17253	0.240983	0.12557	-0.0884221
Rv1439c	544.158	0.0451827	0.088049	0.513155	0.607843	0.254431	0.0370198
Rv1443c	1379.06	-0.169447	0.0761647	-2.22475	0.0260981	0.0202978	-0.146195
Rv1444c	1756.87	-0.103894	0.0553099	-1.8784	0.0603267	0.0407219	-0.0955278
Rv1453	1857.85	-0.028868	0.0890378	-0.324222	0.74577	0.295433	-0.0235517
Rv1455	285.767	0.0280549	0.108637	0.258244	0.796218	0.309055	0.0210843
Rv1456c	464.67	0.0969087	0.0905099	1.0707	0.284305	0.14217	0.0787918
Rv1457c	1165.8	0.105155	0.0661416	1.58985	0.111868	0.0673158	0.0935195
Rv1458c	1364.61	0.144817	0.067023	2.16071	0.0307181	0.0232389	0.128682
Rv1459c	2166.54	0.180374	0.0580907	3.10505	0.00190248	0.00223273	0.165108
Rv1460	862.241	0.872819	0.107686	8.10525	5.26379e-16	5.34298e-15	0.833537
Rv1461	13764.4	0.571908	0.0664538	8.6061	7.55876e-18	9.81395e-17	0.53871
Rv1462	2270.1	1.05001	0.078592	13.3602	1.03246e-40	6.76343e-39	1.0372
Rv1463	2343.81	0.853123	0.0567432	15.0348	4.34322e-51	4.81487e-49	0.843182
Rv1465	1036.34	0.796519	0.0924368	8.6169	6.87882e-18	9.01234e-17	0.761648
Rv1466	1600.62	0.759715	0.0840437	9.03952	1.5736e-19	2.49212e-18	0.728
Rv1473	2741.44	-0.206637	0.059152	-3.49332	0.000477062	0.000670106	-0.188886
Rv1473A	311.621	-0.1801	0.084819	-2.12335	0.0337245	0.0251178	-0.150672
Rv1474c	913.956	-0.0830565	0.081569	-1.01824	0.308566	0.151103	-0.0698719
Rv1476	1414.51	0.0389344	0.0645663	0.603013	0.5465	0.236162	0.034738
Rv1478	3820.98	-0.074925	0.0919189	-0.815121	0.415003	0.191267	-0.0605077
Rv1480	3140.64	0.215108	0.0848088	2.53639	0.0112002	0.0100947	0.180626
Rv1481	4281.42	0.117378	0.0660761	1.7764	0.0756671	0.0490551	0.10447
Rv1482c	221.981	-0.0920809	0.109936	-0.837584	0.402264	0.187179	-0.0689843
Rv1486c	2647.91	0.164816	0.0683695	2.41066	0.0159235	0.0134595	0.145993
Rv1487	1371.41	0.139141	0.0767828	1.81214	0.0699647	0.045895	0.119514
Rv1488	5364.68	0.0804363	0.0621681	1.29385	0.195716	0.106963	0.0723911
Rv1489	1963.93	-0.0631589	0.0528836	-1.1943	0.232361	0.122484	-0.058412
Rv1489A	1262.69	-0.102676	0.0668578	-1.53574	0.124602	0.0736286	-0.0910899
Rv1490	1826.78	-0.169015	0.08369	-2.01953	0.0434319	0.0311408	-0.141856
Rv1491c	2364.62	-0.0145902	0.0552664	-0.263997	0.791782	0.308071	-0.0133942
Rv1496	897.011	0.171886	0.0617619	2.78305	0.00538513	0.00546543	0.155553
Rv1498A	294.926	-0.247575	0.140813	-1.75818	0.0787167	0.0506217	-0.164242
Rv1498c	2059.13	-0.318757	0.0524739	-6.07457	1.24318e-09	5.97212e-09	-0.299084
Rv1499	333.174	-0.109882	0.0963567	-1.14037	0.254132	0.130896	-0.0873134
Rv1500	1814.4	-0.371682	0.0741689	-5.0113	5.40647e-07	1.5709e-06	-0.330733
Rv1501	1908.59	-0.425085	0.0884474	-4.80608	1.53915e-06	3.99671e-06	-0.36509
Rv1502	4636.19	-0.115848	0.0589019	-1.9668	0.0492065	0.0343581	-0.105448
Rv1503c	411.163	-0.383262	0.0935179	-4.09828	4.16239e-05	7.78045e-05	-0.320322
Rv1504c	1274.48	-0.361522	0.0873593	-4.13833	3.49842e-05	6.68678e-05	-0.307498
Rv1505c	1108.16	-0.26861	0.076941	-3.49112	0.000481004	0.000674986	-0.233482
Rv1506c	909.523	-0.282422	0.0863208	-3.27177	0.00106875	0.00136065	-0.23791
Rv1507A	1788.8	-0.183705	0.0654361	-2.80739	0.0049944	0.00513416	-0.164492
Rv1507c	2117.29	-0.317064	0.0782328	-4.05283	5.06008e-05	9.23095e-05	-0.276195
Rv1508A	350.859	-0.148508	0.0937395	-1.58426	0.113134	0.0679074	-0.119628
Rv1508c	5194.17	-0.124012	0.0484945	-2.55723	0.0105508	0.00959342	-0.116233
Rv1509	981.048	-0.277219	0.171788	-1.61372	0.106587	0.0646511	-0.159684
Rv1510	1317.79	0.0597904	0.0553979	1.07929	0.280458	0.140832	0.0548982
Rv1513	1342.66	-0.190418	0.0465808	-4.08792	4.35262e-05	8.09403e-05	-0.179781
Rv1514c	1020.78	-0.169198	0.062532	-2.70579	0.00681428	0.00667611	-0.152734
Rv1515c	1006.08	-0.148523	0.0813383	-1.82599	0.0678514	0.044838	-0.125547
Rv1516c	746.136	-0.0842106	0.0745027	-1.1303	0.258349	0.1325	-0.0727114
Rv1517	360.74	0.205144	0.144345	1.42121	0.155257	0.0886077	0.132921
Rv1518	306.448	-0.0653721	0.141082	-0.463362	0.643105	0.264883	-0.0424341
Rv1519	372.121	-0.222497	0.129589	-1.71694	0.0859899	0.0544492	-0.154804
Rv1520	1354.89	-0.103922	0.0743283	-1.39815	0.162067	0.0917747	-0.089866
Rv1523	861.999	0.000908256	0.0706084	0.0128633	0.989737	0.359019	0.000793769
Rv1524	635.399	0.149704	0.081853	1.82894	0.0674088	0.0446041	0.126314
Rv1526c	778.218	0.0277915	0.172638	0.160982	0.872108	0.330057	0.0155129
Rv1531	1097.76	-0.153778	0.0571593	-2.69035	0.00713774	0.00691312	-0.140936
Rv1532c	745.437	-0.0404864	0.0598755	-0.676176	0.498929	0.220088	-0.0366659
Rv1533	2271.13	-0.180882	0.0585053	-3.09173	0.00198994	0.00232026	-0.165379
Rv1534	1302.64	0.0329595	0.0581213	0.567081	0.570659	0.243858	0.0300068
Rv1535	1194.25	-0.178479	0.101334	-1.76129	0.0781886	0.0503725	-0.139767
Rv1540	2577.52	0.0322214	0.0664471	0.484918	0.627735	0.260875	0.028568
Rv1543	5587.31	-0.0269387	0.0384273	-0.70103	0.483284	0.214505	-0.0258147
Rv1544	2418.27	0.292604	0.0833637	3.50996	0.000448171	0.000634472	0.249513
Rv1545	737.66	0.282874	0.10116	2.7963	0.00516917	0.0052872	0.225011
Rv1546	1397.05	0.141209	0.0575188	2.45501	0.0140882	0.0121724	0.129203
Rv1556	837.896	-0.0896015	0.120056	-0.746333	0.455466	0.204999	-0.0641659
Rv1558	1362.94	-0.146552	0.0564886	-2.59436	0.00947683	0.00873816	-0.134525
Rv1565c	7578.2	0.0431202	0.040713	1.05913	0.289542	0.144039	0.0411178
Rv1566c	2466.66	-0.126488	0.0662419	-1.90948	0.0562004	0.0383134	-0.112568
Rv1567c	701.789	-0.274198	0.0698223	-3.92708	8.59832e-05	0.000147696	-0.244136
Rv1571	106.024	0.438289	0.177384	2.47085	0.0134792	0.0117306	0.257824
Rv1572c	113.698	0.11277	0.27545	0.409405	0.682243	0.276645	0.0394391
Rv1573	80.4675	0.132437	0.206974	0.639873	0.522255	0.227734	0.0631735
Rv1574	276.126	-0.502611	0.10531	-4.77269	1.81778e-06	4.66146e-06	-0.416731
Rv1575	335.777	-0.548715	0.129475	-4.238	2.25521e-05	4.48296e-05	-0.423564
Rv1576c	3687.95	-0.169705	0.0789194	-2.15036	0.0315268	0.0237759	-0.14498
Rv1577c	2757.22	-0.307575	0.101481	-3.03087	0.00243852	0.00276284	-0.24545
Rv1578c	447.077	0.236521	0.137514	1.71997	0.085437	0.0542182	0.159026
Rv1579c	177.71	-0.166674	0.13159	-1.26661	0.205294	0.110993	-0.114021
Rv1580c	442.811	0.0875964	0.0964631	0.908082	0.363835	0.172597	0.0694817
Rv1581c	365.442	0.33752	0.108286	3.11692	0.00182753	0.00216385	0.263617
Rv1582c	729.77	-0.059456	0.15975	-0.372183	0.709757	0.284213	-0.035323
Rv1583c	220.871	0.620082	0.158157	3.92067	8.83027e-05	0.000150603	0.442926
Rv1584c	607.599	-0.328505	0.0830773	-3.95421	7.67872e-05	0.000134302	-0.281976
Rv1585c	1492.82	-0.381912	0.144338	-2.64596	0.00814593	0.00774387	-0.257557
Rv1586c	1829.16	-0.380046	0.12741	-2.98287	0.00285562	0.00317305	-0.276566
Rv1587c	3407.85	0.379412	0.354317	1.07083	0.284247	0.14217	0.0997752
Rv1588c	1322.02	0.0978463	0.308621	0.317044	0.75121	0.297016	0.0297651
Rv1590	740.693	0.177564	0.0900697	1.9714	0.0486776	0.0341044	0.145536
Rv1591	1602.43	-0.245186	0.0545481	-4.49486	6.96142e-06	1.5676e-05	-0.227603
Rv1592c	4120.62	-1.11582	0.0866388	-12.879	5.90996e-38	3.15455e-36	-1.10234
Rv1593c	4219.24	-0.118468	0.0962695	-1.23059	0.218476	0.116875	-0.0942255
Rv1597	3557.39	-0.0209444	0.0668814	-0.313158	0.754161	0.297856	-0.0185404
Rv1598c	1341.67	0.122711	0.0678523	1.8085	0.070528	0.0461385	0.108608
Rv1610	456.662	0.396191	0.0850519	4.65822	3.1895e-06	7.79089e-06	0.341993
Rv1615	3125.19	-0.0391416	0.0681215	-0.574585	0.565572	0.242309	-0.0345125
Rv1616	1987.33	0.0116049	0.085452	0.135806	0.891975	0.33542	0.00960075
Rv1619	1343.84	-0.154158	0.0575067	-2.68069	0.00734707	0.00709678	-0.141145
Rv1624c	2132.82	-0.223494	0.0665792	-3.35682	0.000788448	0.00103961	-0.200032
Rv1626	10945.7	-0.0139414	0.0357629	-0.389829	0.696663	0.28045	-0.0134336
Rv1627c	3488.83	0.335707	0.0755954	4.44084	8.96091e-06	1.98987e-05	0.295776
Rv1628c	1879.65	-0.202075	0.0625673	-3.22973	0.00123908	0.00153414	-0.1828
Rv1632c	1096.46	-0.0023886	0.0767018	-0.0311413	0.975157	0.356151	-0.00204258
Rv1634	1844.76	0.146642	0.058687	2.49872	0.0124644	0.0110273	0.133749
Rv1635c	1710.03	0.00392775	0.05554	0.0707192	0.943621	0.349235	0.00360279
Rv1637c	2531.75	-0.121064	0.0616517	-1.96368	0.049567	0.0345262	-0.109299
Rv1638A	4571.78	0.0972993	0.0555641	1.75112	0.0799255	0.0513537	0.0893798
Rv1639c	16456.6	0.176989	0.0497093	3.56047	0.00037019	0.000537268	0.165716
Rv1645c	926.801	-0.147562	0.0767847	-1.92176	0.054636	0.0374952	-0.12682
Rv1647	1148.69	-0.0890509	0.0491628	-1.81135	0.070087	0.0459543	-0.0832394
Rv1648	1942.19	-0.0393777	0.0482631	-0.815896	0.414559	0.191124	-0.0368635
Rv1667c	244.7	0.145204	0.112115	1.29513	0.195274	0.106843	0.108199
Rv1668c	494.282	0.216628	0.0843575	2.56798	0.0102294	0.00934834	0.182241
Rv1670	357.799	-0.767713	0.10555	-7.27344	3.50434e-13	2.57671e-12	-0.714459
Rv1671	245.781	-0.724826	0.156912	-4.61932	3.84991e-06	9.26275e-06	-0.567037
Rv1672c	1193.14	-0.00728328	0.0628715	-0.115844	0.907776	0.339632	-0.00653212
Rv1673c	236.37	-0.0715818	0.180399	-0.396797	0.691517	0.279002	-0.0385629
Rv1674c	132.691	-0.00613284	0.213878	-0.0286745	0.977124	0.356557	-0.00281663
Rv1676	3309.9	-0.243995	0.0419714	-5.81336	6.12321e-09	2.59547e-08	-0.233316
Rv1678	1863.74	0.151912	0.0515374	2.94761	0.00320244	0.00351238	0.141403
Rv1680	965.69	0.193979	0.068418	2.83521	0.00457953	0.00476527	0.172172
Rv1682	591.321	-0.184614	0.11259	-1.63969	0.101069	0.0619048	-0.137874
Rv1683	7435.76	0.0834945	0.0532286	1.5686	0.11674	0.0696082	0.0771795
Rv1684	330.591	0.00181925	0.0928758	0.019588	0.984372	0.357916	0.00146108
Rv1685c	763.806	-0.195448	0.0617675	-3.16425	0.00155483	0.0018767	-0.177148
Rv1686c	422.298	0.205158	0.0873195	2.34951	0.0187982	0.0154367	0.170452
Rv1687c	408.976	0.20493	0.0927883	2.20857	0.0272045	0.0209997	0.166672
Rv1691	784.094	0.154348	0.103582	1.49009	0.136199	0.07934	0.119431
Rv1692	635.336	0.25232	0.0707068	3.56853	0.000358988	0.00052471	0.223496
Rv1693	445.939	0.253812	0.108451	2.34033	0.0192667	0.0157679	0.194905
Rv1697	8685.71	-0.375057	0.0681765	-5.50127	3.77074e-08	1.37926e-07	-0.339831
Rv1700	2135.15	0.0397949	0.0680566	0.584732	0.558728	0.240125	0.0350966
Rv1701	1974.92	0.294155	0.0568777	5.1717	2.31973e-07	7.20503e-07	0.272428
Rv1702c	1401.46	0.202682	0.262638	0.771715	0.440283	0.200433	0.0755524
Rv1703c	4039	-0.000971321	0.0480008	-0.0202355	0.983856	0.357916	-0.000909741
Rv1706A	803.85	-2.76798	0.278756	-9.92974	3.09045e-23	6.4549e-22	-2.68561
Rv1707	10040	-0.00440976	0.055119	-0.0800043	0.936234	0.347483	-0.0040499
Rv1708	2409.02	-0.180719	0.0472376	-3.82575	0.000130372	0.000212459	-0.170281
Rv1711	1913.63	-0.161192	0.0422601	-3.81429	0.000136575	0.000221405	-0.153544
Rv1714	266.603	0.511559	0.172529	2.96507	0.00302619	0.00334452	0.318698
Rv1716	380.948	0.557171	0.183699	3.03307	0.00242077	0.00274489	0.337583
Rv1717	93.9802	0.525947	0.181049	2.905	0.00367252	0.00392636	0.316901
Rv1718	334.353	0.477181	0.113082	4.21977	2.44556e-05	4.82144e-05	0.380751
Rv1719	266.746	0.981857	0.434366	2.26044	0.0237942	0.0187796	0.254381
Rv1722	665.248	0.263107	0.106355	2.47386	0.0133662	0.0116464	0.204155
Rv1723	447.924	0.0336165	0.0747383	0.449789	0.652863	0.267983	0.0289604
Rv1724c	522.206	-0.370421	0.0976108	-3.79488	0.000147714	0.000237856	-0.30405
Rv1725c	454.075	0.136993	0.0847893	1.61568	0.106163	0.0645021	0.114202
Rv1726	300.818	0.366363	0.125143	2.92754	0.0034165	0.00371046	0.268234
Rv1727	333.293	-0.248887	0.0901164	-2.76184	0.00574774	0.00578621	-0.205701
Rv1728c	1636.19	-0.308599	0.0585949	-5.26665	1.38933e-07	4.55061e-07	-0.284883
Rv1729c	1346.4	-0.296843	0.0483423	-6.14044	8.22937e-10	4.02032e-09	-0.280757
Rv1730c	1387.9	-0.237897	0.0918188	-2.59094	0.00957154	0.00881421	-0.195035
Rv1732c	1246.03	-0.432678	0.0620709	-6.9707	3.15366e-12	2.0381e-11	-0.401526
Rv1733c	2518.77	-2.23039	0.255143	-8.74172	2.29597e-18	3.18163e-17	-2.17194
Rv1734c	9309.63	-1.05373	0.243844	-4.3213	1.5511e-05	3.23971e-05	-0.811018
Rv1735c	1134.68	-2.31095	0.289902	-7.97148	1.56781e-15	1.43005e-14	-2.23377
Rv1738	13335.9	-1.95789	0.221683	-8.83191	1.02901e-18	1.49796e-17	-1.91724
Rv1739c	6794.46	-3.01777	0.308345	-9.78699	1.28047e-22	2.49376e-21	-2.91032
Rv1742	733.584	-0.194204	0.0637425	-3.04669	0.00231376	0.00263391	-0.174949
Rv1744c	632.278	0.115013	0.0709923	1.62008	0.105214	0.064088	0.10068
Rv1747	9655.55	0.0363904	0.0402218	0.904743	0.365602	0.173378	0.0347369
Rv1748	581.247	-0.0512635	0.0678023	-0.756073	0.449605	0.203249	-0.0452602
Rv1749c	1389.07	-0.201341	0.0601578	-3.34687	0.000817286	0.00107272	-0.18344
Rv1751	5358.24	-0.0626808	0.0535666	-1.17015	0.241941	0.125923	-0.0578581
Rv1752	579.918	-0.00711234	0.084023	-0.0846475	0.932542	0.346916	-0.00591666
Rv1754c	4955.31	-0.54104	0.0523462	-10.3358	4.85351e-25	1.16579e-23	-0.519557
Rv1756c	7014.93	-0.139359	0.0825932	-1.68729	0.0915474	0.0574133	-0.117168
Rv1757c	1496.88	0.156108	0.322291	0.484369	0.628124	0.260875	0.0451149
Rv1760	2694.22	0.208143	0.0563136	3.69615	0.000218896	0.000337038	0.191818
Rv1761c	448.678	0.0991876	0.078575	1.26233	0.20683	0.11164	0.0844435
Rv1762c	583.399	-0.0785183	0.076115	-1.03157	0.302272	0.149085	-0.0673892
Rv1763	1506.47	0.154329	0.324077	0.47621	0.633925	0.261625	0.0442796
Rv1764	6418.18	-0.122062	0.0875866	-1.39361	0.163434	0.0922229	-0.100553
Rv1765A	2196.12	-0.288881	0.0676459	-4.27049	1.9504e-05	3.9534e-05	-0.259371
Rv1765c	3097.41	-0.555943	0.127216	-4.37007	1.24209e-05	2.67974e-05	-0.434708
Rv1766	627.967	-0.227128	0.0903884	-2.5128	0.0119777	0.0106806	-0.18698
Rv1767	294.202	-0.0969899	0.0938399	-1.03357	0.301338	0.148777	-0.0778055
Rv1769	3052.25	0.0753095	0.0464618	1.62089	0.105041	0.0640636	0.0708639
Rv1770	2415.88	0.334086	0.0708795	4.71343	2.43581e-06	6.04767e-06	0.29865
Rv1771	3564.7	-0.113241	0.0516742	-2.19143	0.0284204	0.0217866	-0.105216
Rv1772	4670.85	-0.125843	0.0509205	-2.47136	0.0134599	0.0117209	-0.117212
Rv1773c	2050.77	-0.106629	0.0575011	-1.85437	0.0636858	0.0425115	-0.0974276
Rv1774	1086.82	0.132265	0.0624839	2.11678	0.0342786	0.0254384	0.119165
Rv1775	1395.81	0.402289	0.0576139	6.9825	2.89972e-12	1.88243e-11	0.375863
Rv1776c	964.461	0.0222503	0.0547835	0.40615	0.684633	0.277156	0.020456
Rv1778c	557.571	-0.234124	0.146503	-1.59808	0.110025	0.0664007	-0.150867
Rv1779c	1059.91	-0.0020853	0.0820954	-0.0254009	0.979735	0.357189	-0.0017476
Rv1780	1912.95	-0.117745	0.0553907	-2.12571	0.0335271	0.0250744	-0.108291
Rv1786	378.184	-0.39406	0.133556	-2.95052	0.00317242	0.00348476	-0.280226
Rv1794	13534.8	0.0144544	0.053663	0.269355	0.787656	0.306963	0.013331
Rv1804c	319.248	-1.12036	0.170405	-6.57473	4.87422e-11	2.74398e-10	-1.0586
Rv1805c	5139.68	-0.140467	0.137697	-1.02011	0.307675	0.150738	-0.0931423
Rv1810	8839.84	-0.280796	0.0534321	-5.2552	1.47867e-07	4.82678e-07	-0.262083
Rv1812c	3301.37	-1.21242	0.120789	-10.0375	1.04265e-23	2.38514e-22	-1.19073
Rv1813c	12048.6	-1.90184	0.229116	-8.30078	1.03434e-16	1.12929e-15	-1.85879
Rv1815	9370.42	-0.331418	0.0958467	-3.45779	0.00054462	0.000749658	-0.271643
Rv1816	4019.69	-0.390618	0.0667377	-5.85303	4.82687e-09	2.08274e-08	-0.356114
Rv1817	1292.94	-0.0305556	0.0614305	-0.497401	0.618906	0.257715	-0.0275347
Rv1823	1440.23	0.0828319	0.0626405	1.32234	0.186056	0.102696	0.0744413
Rv1824	902.068	-0.14134	0.0744089	-1.89951	0.0574977	0.0390685	-0.122451
Rv1825	2880.7	-0.046842	0.0438502	-1.06823	0.285418	0.142627	-0.0443426
Rv1828	8981.11	-0.0812582	0.0699764	-1.16122	0.245551	0.127433	-0.0712751
Rv1829	5936.22	-0.144174	0.0609977	-2.36359	0.0180986	0.0149645	-0.130571
Rv1830	6706.4	-0.296372	0.0620067	-4.77968	1.75577e-06	4.51853e-06	-0.27074
Rv1831	4430.81	-0.183663	0.0764784	-2.4015	0.0163282	0.0136942	-0.158472
Rv1833c	1567.79	-0.364735	0.0905432	-4.0283	5.61818e-05	0.000101591	-0.306931
Rv1835c	2995.08	0.0935914	0.0504349	1.85569	0.063498	0.0424254	0.0871993
Rv1836c	6959.83	0.0043934	0.0491876	0.0893194	0.928828	0.345981	0.00410205
Rv1841c	3770.6	0.0374254	0.0504413	0.74196	0.458112	0.205845	0.0348329
Rv1842c	3188.31	0.104346	0.0716067	1.45721	0.145059	0.0834894	0.0911004
Rv1847	1664.74	-0.00677937	0.066362	-0.102157	0.918632	0.343159	-0.00601116
Rv1855c	2724.54	0.0650185	0.0573638	1.13344	0.257029	0.132058	0.0593605
Rv1856c	2158.04	0.941065	0.0608433	15.467	5.79107e-54	8.34593e-52	0.931585
Rv1861	718.627	0.114816	0.0694032	1.65434	0.0980593	0.0602903	0.101052
Rv1863c	7300.51	-0.0659697	0.0654403	-1.00809	0.313412	0.153112	-0.0587248
Rv1864c	668.654	-0.231099	0.0667851	-3.46034	0.000539498	0.000744029	-0.206844
Rv1865c	524.714	-0.0903978	0.0854335	-1.05811	0.290007	0.14417	-0.0749566
Rv1866	860.241	0.0752928	0.093624	0.804204	0.421279	0.193417	0.0603863
Rv1867	688.945	0.0604879	0.0744457	0.81251	0.416499	0.191711	0.0521962
Rv1868	2320.64	0.0609659	0.0485432	1.25591	0.209149	0.112638	0.0570478
Rv1869c	6253.96	0.0687586	0.0588308	1.16875	0.242504	0.126079	0.0625042
Rv1870c	15245.7	-0.132554	0.0786126	-1.68617	0.0917635	0.057517	-0.113053
Rv1871c	49826	-0.190092	0.0456781	-4.16157	3.16071e-05	6.12249e-05	-0.179855
Rv1873	161.748	-0.152573	0.119365	-1.2782	0.201179	0.109217	-0.110173
Rv1874	1205.07	-0.0437348	0.0576523	-0.758596	0.448094	0.202757	-0.0398788
Rv1875	1321.57	-0.0406469	0.0801415	-0.507189	0.612022	0.255439	-0.0343321
Rv1877	4623.8	-0.0660068	0.0425394	-1.55166	0.120743	0.0716392	-0.0626941
Rv1879	3422.06	-0.104528	0.0515544	-2.02753	0.0426079	0.0305956	-0.0971258
Rv1882c	3494.7	-0.22192	0.046711	-4.75092	2.0249e-06	5.11971e-06	-0.20977
Rv1883c	17775.3	-0.291399	0.0817012	-3.56664	0.000361592	0.000527446	-0.249907
Rv1885c	3626.87	-0.288795	0.0632068	-4.56905	4.89933e-06	1.14996e-05	-0.262722
Rv1887	13246.2	-0.0384947	0.0602312	-0.639115	0.522748	0.22788	-0.0348228
Rv1888A	238.776	-0.222051	0.100303	-2.21379	0.0268429	0.0207874	-0.175579
Rv1888c	3208.37	-0.33359	0.0495055	-6.73844	1.60096e-11	9.73527e-11	-0.315501
Rv1889c	312.154	-0.0957348	0.0955969	-1.00144	0.316613	0.154101	-0.076243
Rv1890c	375.755	-0.112423	0.162839	-0.690394	0.489946	0.216927	-0.0660259
Rv1891	3425.91	0.0549709	0.039576	1.38899	0.164834	0.0929765	0.0525569
Rv1892	2202.21	-0.110798	0.0850264	-1.3031	0.19254	0.105507	-0.0921197
Rv1893	2132.52	-0.0999325	0.0566064	-1.76539	0.0774979	0.0500618	-0.0915288
Rv1894c	3547.25	-0.326122	0.0609699	-5.34891	8.8487e-08	2.98654e-07	-0.299668
Rv1895	911.782	-0.0645937	0.0795846	-0.811636	0.417001	0.191881	-0.0547079
Rv1896c	1118.6	-0.103016	0.0475266	-2.16754	0.0301937	0.0229144	-0.0967338
Rv1897c	320.619	0.0593698	0.0912473	0.650647	0.515274	0.225509	0.0480465
Rv1898	1050.56	0.155503	0.0572123	2.71801	0.00656766	0.00646967	0.142508
Rv1903	760.14	-0.242697	0.0794375	-3.0552	0.00224912	0.00257417	-0.208483
Rv1904	8022.21	-0.18868	0.0712866	-2.64679	0.00812606	0.00773007	-0.165815
Rv1906c	3891.96	0.00409293	0.0536224	0.0763287	0.939158	0.34812	0.00377514
Rv1907c	982.184	-0.242364	0.120616	-2.00939	0.0444957	0.0317299	-0.176176
Rv1910c	848.896	-0.0551786	0.0941456	-0.586098	0.55781	0.239897	-0.0441257
Rv1913	614.748	-0.236945	0.101693	-2.33001	0.0198058	0.0160872	-0.186681
Rv1914c	387.339	-0.230641	0.0999427	-2.30774	0.0210137	0.0169092	-0.18286
Rv1919c	2721.51	-0.0407766	0.0407116	-1.0016	0.316539	0.154101	-0.0388823
Rv1920	1171.28	-0.166517	0.0629124	-2.6468	0.00812576	0.00773007	-0.150112
Rv1922	874.574	0.353918	0.102935	3.43826	0.000585458	0.000797492	0.283514
Rv1924c	1531.57	0.00494079	0.0531995	0.0928728	0.926005	0.345376	0.00456265
Rv1927	769.615	-0.215994	0.0708055	-3.05052	0.00228445	0.00260879	-0.190575
Rv1928c	876.334	-0.391127	0.068949	-5.6727	1.40564e-08	5.62716e-08	-0.354435
Rv1929c	1450.91	-0.262682	0.133545	-1.967	0.0491833	0.0343581	-0.180746
Rv1930c	52.3121	0.338357	0.20922	1.61723	0.105829	0.0643534	0.165256
Rv1931c	163.005	0.179867	0.154575	1.16362	0.244578	0.127065	0.110649
Rv1936	499.757	-0.0400184	0.0691017	-0.579123	0.562506	0.24127	-0.0351686
Rv1937	1584.5	0.000668911	0.0632227	0.0105802	0.991558	0.359562	0.00059924
Rv1939	143.758	0.135557	0.129144	1.04966	0.293875	0.145692	0.0934745
Rv1941	2458.89	0.0477102	0.0602229	0.792226	0.428229	0.196046	0.0431666
Rv1944c	273.73	0.10332	0.109833	0.9407	0.346859	0.165744	0.077495
Rv1945	2162.82	-0.204735	0.211409	-0.96843	0.33283	0.160262	-0.0964244
Rv1947	990.772	0.00368928	0.0548137	0.0673058	0.946338	0.349971	0.00339121
Rv1948c	338.507	-0.643068	0.124509	-5.16483	2.4066e-07	7.42684e-07	-0.534296
Rv1949c	490.895	-0.125509	0.230863	-0.543652	0.586681	0.248095	-0.0535557
Rv1950c	133.771	-0.00872201	0.144947	-0.0601738	0.952017	0.351029	-0.00555147
Rv1951c	166.979	0.125856	0.13933	0.903295	0.36637	0.173685	0.0827058
Rv1954c	937.928	-0.860849	0.109227	-7.88126	3.24087e-15	2.86543e-14	-0.818606
Rv1957	1648.14	-1.34507	0.100092	-13.4384	3.60359e-41	2.5967e-39	-1.33447
Rv1958c	2465.39	-1.11894	0.0938491	-11.9228	9.00328e-33	3.50683e-31	-1.10312
Rv1961	224.6	-0.407826	0.105226	-3.87573	0.000106305	0.000177115	-0.328145
Rv1972	188.708	0.554031	0.303978	1.8226	0.0683635	0.0450703	0.188731
Rv1973	68.8525	0.490832	0.208036	2.35936	0.0183063	0.0151036	0.254522
Rv1974	149.359	0.15322	0.128534	1.19206	0.233237	0.122856	0.10614
Rv1975	695.491	0.0748524	0.0648118	1.15492	0.248123	0.12849	0.0667859
Rv1976c	618.916	0.194764	0.0734521	2.65158	0.00801173	0.00763643	0.169996
Rv1977	1968.13	0.0288034	0.0424672	0.678251	0.497612	0.219646	0.0273522
Rv1978	1259.78	-0.167763	0.0801347	-2.09352	0.036303	0.0266661	-0.142664
Rv1979c	5024.43	-0.102806	0.058796	-1.74853	0.080373	0.0515947	-0.0935603
Rv1985c	902.913	-0.251172	0.0926024	-2.71237	0.00668045	0.00656421	-0.205671
Rv1986	871.843	0.0542018	0.0744474	0.728055	0.46658	0.208568	0.0467635
Rv1987	4204.79	-0.438661	0.0516472	-8.4934	2.0067e-17	2.41e-16	-0.416766
Rv1989c	2271.94	-0.369642	0.0750605	-4.92459	8.45363e-07	2.36279e-06	-0.327915
Rv1990A	796.041	-0.53279	0.099286	-5.36622	8.04055e-08	2.73298e-07	-0.455996
Rv1990c	958.252	-0.217643	0.0835979	-2.60346	0.00922892	0.00855886	-0.183633
Rv1993c	4256.04	-1.8188	0.24485	-7.42822	1.1007e-13	8.52849e-13	-1.7692
Rv1995	595.841	-0.999294	0.131342	-7.60832	2.77687e-14	2.32671e-13	-0.954844
Rv1996	16944	-1.52497	0.12808	-11.9064	1.09631e-32	3.85359e-31	-1.51124
Rv1998c	5804.98	-2.48536	0.285767	-8.69716	3.40295e-18	4.6707e-17	-2.40602
Rv1999c	214.937	-0.856998	0.187206	-4.57784	4.69803e-06	1.10813e-05	-0.672158
Rv2000	817.066	-0.205985	0.162638	-1.26653	0.205324	0.110993	-0.122389
Rv2001	714.213	-0.282374	0.102342	-2.75911	0.00579584	0.00581569	-0.223516
Rv2003c	2068.17	-1.78579	0.149887	-11.9142	9.97798e-33	3.63814e-31	-1.76813
Rv2004c	4612.31	-1.91838	0.202174	-9.48874	2.33834e-21	4.01186e-20	-1.885
Rv2005c	3444.26	-2.01042	0.237057	-8.48076	2.23734e-17	2.66479e-16	-1.96323
Rv2008c	573.757	-0.71393	0.0962063	-7.42083	1.16393e-13	8.97016e-13	-0.662824
Rv2011c	294.347	-0.318765	0.134128	-2.37658	0.0174738	0.0145145	-0.221416
Rv2012	200.902	-0.453725	0.155067	-2.92599	0.00343358	0.00372339	-0.2988
Rv2013	43.5318	-0.173232	0.258178	-0.670979	0.502234	0.22128	-0.0656439
Rv2014	490.275	-0.0362241	0.374338	-0.0967684	0.92291	0.344579	-0.00854954
Rv2015c	3281.19	-0.545781	0.125651	-4.34362	1.40154e-05	2.98355e-05	-0.427159
Rv2016	1236.41	-0.520652	0.146219	-3.56076	0.000369778	0.000537213	-0.368559
Rv2017	954.556	-0.256616	0.149353	-1.71819	0.0857626	0.0543703	-0.163823
Rv2018	1170.32	-0.0915978	0.0818652	-1.11889	0.263189	0.134482	-0.0770012
Rv2019	688.16	-0.263697	0.0787334	-3.34924	0.000810334	0.00106457	-0.227662
Rv2020c	1182.35	-0.135654	0.0533435	-2.54303	0.0109894	0.00994204	-0.12557
Rv2021c	1367.47	-0.0355638	0.0676574	-0.525645	0.599135	0.252031	-0.0314053
Rv2022c	909.05	-0.315799	0.069788	-4.52512	6.0361e-06	1.383e-05	-0.282581
Rv2023A	363.721	-0.275609	0.113662	-2.4248	0.0153166	0.0130384	-0.207772
Rv2023c	357.988	0.211814	0.0777646	2.72378	0.00645386	0.00637938	0.182416
Rv2024c	2304.7	0.0486839	0.0411909	1.18191	0.237242	0.12442	0.0463751
Rv2025c	1324.58	0.646363	0.113854	5.67711	1.36988e-08	5.50354e-08	0.556974
Rv2026c	767.738	-0.0818991	0.0753841	-1.08642	0.277291	0.139729	-0.0704859
Rv2028c	3272.16	-2.30637	0.322076	-7.16094	8.01274e-13	5.63304e-12	-2.21149
Rv2030c	28633.6	-2.42093	0.350198	-6.91304	4.74392e-12	2.97253e-11	-2.30523
Rv2033c	1158.39	-1.63951	0.115051	-14.2503	4.46665e-46	4.02326e-44	-1.62922
Rv2034	134.811	0.134231	0.164377	0.816601	0.414156	0.190999	0.078406
Rv2035	659.294	-0.260614	0.0806907	-3.22979	0.0012388	0.00153414	-0.223372
Rv2036	1186.55	-0.358965	0.0672416	-5.33843	9.37559e-08	3.14961e-07	-0.325408
Rv2037c	1245.88	-0.162277	0.123746	-1.31137	0.189731	0.104405	-0.11501
Rv2038c	523.52	-0.297264	0.0844397	-3.52043	0.000430846	0.000613561	-0.25269
Rv2039c	388.538	-0.192824	0.164657	-1.17106	0.241573	0.125776	-0.113254
Rv2040c	816.617	-0.333075	0.072983	-4.56374	5.02511e-06	1.16996e-05	-0.295781
Rv2041c	952.918	-0.316739	0.0579803	-5.46288	4.68475e-08	1.68368e-07	-0.293092
Rv2042c	1020.44	-0.129205	0.0587125	-2.20064	0.0277615	0.0213496	-0.117739
Rv2044c	227.248	-0.153452	0.102758	-1.49334	0.135348	0.0789718	-0.119142
Rv2047c	2140.64	0.0934708	0.0454255	2.05767	0.0396214	0.0287664	0.088212
Rv2049c	559.143	0.178346	0.0787173	2.26566	0.0234724	0.0185637	0.152587
Rv2050	2206.03	-0.194513	0.0607219	-3.20334	0.00135843	0.0016591	-0.176841
Rv2052c	1914.76	0.056286	0.103492	0.543869	0.586532	0.248095	0.0432851
Rv2054	1605.99	0.273021	0.0728802	3.74616	0.000179563	0.000282195	0.240682
Rv2059	881.955	0.222646	0.252226	0.882721	0.377387	0.178029	0.0871445
Rv2061c	746.202	0.298494	0.0892466	3.3446	0.000824008	0.00108056	0.249367
Rv2067c	2904.4	-0.380767	0.0434573	-8.76188	1.92018e-18	2.68671e-17	-0.365755
Rv2073c	209.208	0.432634	0.113022	3.82787	0.000129259	0.000210968	0.340036
Rv2074	2482.05	0.114081	0.0674469	1.69142	0.0907573	0.0570419	0.101062
Rv2075c	2528.52	-0.0270189	0.0608873	-0.443753	0.657221	0.269312	-0.0243884
Rv2076c	512.906	-0.115624	0.0860441	-1.34377	0.179021	0.0995947	-0.095783
Rv2077A	128.52	0.145116	0.189114	0.767346	0.442876	0.20109	0.0754101
Rv2077c	13521.2	-0.157094	0.104721	-1.50012	0.133583	0.0780602	-0.121002
Rv2078	125.479	-0.0183804	0.136679	-0.134478	0.893025	0.335682	-0.0121624
Rv2079	1974.31	0.0984516	0.066497	1.48054	0.138729	0.0805551	0.0874307
Rv2081c	4044.25	0.103407	0.0492428	2.09995	0.0357334	0.0263148	0.0966744
Rv2082	3932.51	0.327968	0.220656	1.48633	0.137191	0.0797887	0.151345
Rv2083	963.192	0.438332	0.0843726	5.19519	2.04506e-07	6.46336e-07	0.382659
Rv2084	2053.2	0.24351	0.0587605	4.14411	3.41134e-05	6.53768e-05	0.223445
Rv2085	885.87	0.178834	0.0581007	3.078	0.00208393	0.00241423	0.163678
Rv2086	332.991	-0.168152	0.106258	-1.58249	0.113538	0.0680083	-0.128822
Rv2087	46.0969	-0.137034	0.214951	-0.637509	0.523793	0.228189	-0.062996
Rv2090	2088.4	-0.0958288	0.0437069	-2.19253	0.0283411	0.0217373	-0.0908173
Rv2091c	7034.86	-0.0311581	0.0326289	-0.954922	0.339617	0.162986	-0.0302078
Rv2100	2336.5	0.193205	0.0671475	2.87732	0.00401074	0.00422527	0.172179
Rv2102	1817.22	0.142609	0.0510872	2.79149	0.00524653	0.00535114	0.132852
Rv2105	1506.47	0.154329	0.324077	0.47621	0.633925	0.261625	0.0442796
Rv2106	7012.88	-0.138562	0.0826892	-1.67569	0.0937984	0.0581919	-0.116449
Rv2113	894.176	0.189259	0.0775642	2.44003	0.0146862	0.012606	0.162753
Rv2114	5133.31	-0.282492	0.0461885	-6.11607	9.59138e-10	4.65416e-09	-0.268229
Rv2117	334.747	0.0132215	0.104422	0.126617	0.899244	0.337228	0.0101175
Rv2118c	748.632	0.0956787	0.0616463	1.55206	0.120648	0.0716124	0.0862936
Rv2119	571.171	-0.249763	0.0764026	-3.26904	0.00107914	0.00136928	-0.217011
Rv2120c	1136.82	-0.058901	0.0711098	-0.82831	0.407495	0.188988	-0.0514269
Rv2125	1538.51	0.389633	0.07277	5.3543	8.58866e-08	2.90557e-07	0.34915
Rv2128	2115.38	-0.218541	0.0597716	-3.65628	0.000255906	0.000386588	-0.19958
Rv2129c	3684.71	-0.064684	0.0581576	-1.11222	0.266044	0.135244	-0.0589144
Rv2132	1180.54	-0.221773	0.063836	-3.47411	0.000512544	0.000713685	-0.200153
Rv2133c	2136.42	0.00423027	0.06624	0.0638627	0.94908	0.350625	0.00375241
Rv2134c	4603.04	0.092655	0.0545998	1.69698	0.0896997	0.0564263	0.0853372
Rv2135c	2037.17	0.205948	0.0735343	2.8007	0.00509913	0.00521927	0.179888
Rv2136c	5705.69	-0.220168	0.0867397	-2.53826	0.0111407	0.0100599	-0.183644
Rv2137c	21752.7	-0.0439312	0.129867	-0.338278	0.735153	0.29203	-0.0300196
Rv2141c	2114.16	0.157405	0.0482522	3.26214	0.00110575	0.00139543	0.1478
Rv2143	1533.62	-0.0321814	0.0543096	-0.592555	0.553479	0.238463	-0.0296292
Rv2144c	6813.02	-0.369456	0.0432269	-8.5469	1.26443e-17	1.55749e-16	-0.354787
Rv2146c	2285.13	-0.363348	0.0751046	-4.83789	1.31223e-06	3.49567e-06	-0.321968
Rv2147c	7992.1	-0.266004	0.038314	-6.94273	3.84581e-12	2.45242e-11	-0.256455
Rv2148c	1235.18	-0.166323	0.0514484	-3.23282	0.00122574	0.00152416	-0.154953
Rv2159c	3798.87	0.525342	0.0940915	5.58331	2.35981e-08	8.99709e-08	0.455858
Rv2160A	1716.78	0.380141	0.10144	3.74743	0.000178657	0.000281395	0.308187
Rv2161c	7088.86	0.427584	0.0790085	5.41187	6.23691e-08	2.17639e-07	0.378652
Rv2164c	1110.99	0.355851	0.078938	4.50798	6.54489e-06	1.48307e-05	0.311124
Rv2165c	1802.07	0.0560218	0.0553106	1.01286	0.311129	0.152151	0.0514473
Rv2166c	5621.9	-0.119243	0.0468417	-2.54566	0.0109071	0.00989236	-0.112215
Rv2167c	7013.92	-0.138784	0.0827804	-1.67653	0.0936344	0.0581584	-0.116597
Rv2168c	1506.47	0.154329	0.324077	0.47621	0.633925	0.261625	0.0442796
Rv2169c	3234.28	-0.160908	0.0643118	-2.502	0.0123494	0.0109524	-0.144373
Rv2170	271.275	0.16153	0.0891938	1.81099	0.0701417	0.0459692	0.132646
Rv2172c	5478.8	-0.280343	0.0554325	-5.05737	4.25078e-07	1.25023e-06	-0.260319
Rv2175c	1236.46	-0.0536177	0.0496128	-1.08072	0.27982	0.140561	-0.0500249
Rv2177c	773.001	-0.016355	0.139536	-0.11721	0.906694	0.339403	-0.0106785
Rv2179c	230.188	0.00714004	0.11485	0.0621683	0.950429	0.350944	0.00521973
Rv2180c	591.545	-0.00124711	0.0848251	-0.0147021	0.98827	0.358848	-0.00103422
Rv2181	5094.13	-0.0416703	0.0477524	-0.872631	0.382864	0.179995	-0.0390624
Rv2182c	8841.77	-0.258213	0.0492694	-5.24084	1.59843e-07	5.17667e-07	-0.243097
Rv2183c	1522.53	0.235728	0.0576856	4.08643	4.38052e-05	8.13543e-05	0.216827
Rv2184c	3025.47	0.162657	0.0741116	2.19475	0.0281814	0.0216378	0.141278
Rv2186c	621.838	0.0185255	0.0823734	0.224896	0.82206	0.315424	0.0155103
Rv2189c	1628.82	-0.0439877	0.098293	-0.447516	0.654502	0.268427	-0.0345662
Rv2190c	18696.2	-0.205189	0.0639337	-3.2094	0.0013301	0.00162725	-0.184887
Rv2191	380.648	-0.337475	0.0962477	-3.50632	0.00045435	0.000641958	-0.276514
Rv2197c	2954.65	0.135179	0.0800815	1.68802	0.0914071	0.0573752	0.114691
Rv2199c	4920.55	-0.139565	0.0386358	-3.61232	0.000303475	0.000451352	-0.133905
Rv2203	7797.75	-0.230332	0.0347909	-6.62048	3.58042e-11	2.064e-10	-0.223215
Rv2204c	9101.39	-0.0956854	0.0410163	-2.33286	0.0196553	0.0160038	-0.0912456
Rv2205c	1005.57	0.16534	0.150901	1.09569	0.273215	0.138255	0.103314
Rv2206	1438.83	0.163333	0.0754026	2.16614	0.0303002	0.0229744	0.141232
Rv2209	3777.57	0.0361828	0.0649053	0.55747	0.577206	0.245602	0.0322458
Rv2212	1856.89	0.0343527	0.0526849	0.65204	0.514375	0.225252	0.0317751
Rv2216	2673.16	0.292348	0.065025	4.49593	6.92661e-06	1.5622e-05	0.264647
Rv2219	4099.4	0.0842669	0.0477777	1.76373	0.0777777	0.0501527	0.0790424
Rv2219A	996.728	0.10893	0.0627291	1.73652	0.082472	0.0527079	0.097962
Rv2223c	2971.47	-0.113289	0.0656005	-1.72696	0.0841753	0.0536301	-0.100968
Rv2226	1340.05	0.210774	0.0583271	3.61366	0.000301906	0.000449482	0.19318
Rv2227	1223.17	-0.220556	0.0712783	-3.0943	0.00197279	0.00230213	-0.19438
Rv2228c	1308.51	0.174695	0.0695465	2.51192	0.0120076	0.0106846	0.154252
Rv2229c	966.008	0.0911707	0.0499415	1.82555	0.0679179	0.044838	0.0850505
Rv2230c	687.479	0.373868	0.070469	5.30543	1.12405e-07	3.71548e-07	0.336478
Rv2235	988.73	0.123648	0.0593075	2.08486	0.037082	0.0271829	0.112447
Rv2237	2984.06	-0.234273	0.0416085	-5.63043	1.79764e-08	7.09784e-08	-0.224094
Rv2237A	1246.25	0.136901	0.0665863	2.05599	0.0397832	0.0288548	0.121766
Rv2239c	4226.23	0.0988482	0.0526216	1.87847	0.0603165	0.0407219	0.0915646
Rv2240c	1513.45	0.379664	0.107324	3.53756	0.00040384	0.000580842	0.300716
Rv2242	1691.88	0.0333244	0.0704551	0.472987	0.636222	0.262348	0.0291465
Rv2248	3476.59	-0.486084	0.0631458	-7.6978	1.38427e-14	1.17351e-13	-0.453582
Rv2250A	137.885	-0.0820179	0.148535	-0.552179	0.580825	0.246465	-0.0514476
Rv2250c	215.472	0.146958	0.128986	1.13933	0.254564	0.131072	0.101524
Rv2251	1241.89	0.30669	0.0594096	5.16229	2.43943e-07	7.49604e-07	0.282455
Rv2252	1356.49	0.108845	0.0812708	1.33929	0.180475	0.100346	0.0917882
Rv2253	414.586	-0.492263	0.0990672	-4.96899	6.73036e-07	1.92324e-06	-0.415623
Rv2254c	364.882	-0.575583	0.0895417	-6.4281	1.2921e-10	6.87136e-10	-0.514995
Rv2255c	635.748	-0.380909	0.0726045	-5.24636	1.55134e-07	5.03549e-07	-0.341032
Rv2256c	7982.48	-0.201571	0.0521995	-3.86154	0.000112673	0.000186645	-0.187758
Rv2257c	967.468	0.316673	0.0683472	4.6333	3.59887e-06	8.71697e-06	0.284631
Rv2258c	2598.06	0.19361	0.0658062	2.94212	0.00325975	0.0035671	0.173285
Rv2260	1490.12	0.180002	0.0457988	3.93028	8.48477e-05	0.000145919	0.170187
Rv2261c	433.914	-0.070373	0.0807248	-0.871764	0.383337	0.180129	-0.0593605
Rv2262c	447.891	0.490872	0.147717	3.32306	0.000890368	0.00115565	0.340046
Rv2263	443.397	0.161073	0.0934327	1.72395	0.0847173	0.0538801	0.130058
Rv2264c	1550.77	0.0565626	0.0508909	1.11145	0.266376	0.135317	0.0525936
Rv2265	265.397	0.326528	0.134473	2.4282	0.0151741	0.0129476	0.22688
Rv2267c	502.953	-0.3312	0.131694	-2.51492	0.0119061	0.0106246	-0.233326
Rv2269c	120.229	-0.21564	0.187021	-1.15302	0.248901	0.128741	-0.11419
Rv2271	1951.81	-0.0370317	0.120516	-0.307277	0.758633	0.299211	-0.0264043
Rv2272	1613.44	0.0745708	0.0675032	1.1047	0.26929	0.136604	0.0659452
Rv2273	220.716	0.382386	0.101178	3.77933	0.000157249	0.000250412	0.310489
Rv2275	727.644	-0.0406249	0.0681779	-0.595866	0.551265	0.237651	-0.0358144
Rv2277c	248.884	-0.279827	0.250601	-1.11662	0.264155	0.134771	-0.111334
Rv2278	1496.88	0.156108	0.322291	0.484369	0.628124	0.260875	0.0451149
Rv2279	7014.91	-0.138406	0.0825702	-1.67623	0.0936937	0.0581584	-0.116369
Rv2280	3953.1	-0.0997354	0.06155	-1.6204	0.105147	0.0640742	-0.0899927
Rv2282c	276.617	0.173598	0.146954	1.1813	0.237483	0.124456	0.110628
Rv2285	1915.23	-0.0128424	0.0468169	-0.274311	0.783845	0.305648	-0.0120652
Rv2286c	885.904	-0.03325	0.0575757	-0.5775	0.563602	0.241597	-0.0303212
Rv2288	911.372	0.0876804	0.103936	0.843601	0.398892	0.185742	0.067397
Rv2292c	470.845	-0.156535	0.0970616	-1.61274	0.106801	0.0647536	-0.12449
Rv2293c	1429.97	-0.297149	0.0499381	-5.95035	2.67577e-09	1.20508e-08	-0.280027
Rv2294	1060.25	-0.0405798	0.0631667	-0.642424	0.520598	0.227355	-0.0363714
Rv2295	3502.95	-0.0446044	0.0646333	-0.690115	0.490122	0.216938	-0.039792
Rv2296	3175.11	0.0145301	0.0433693	0.335032	0.737601	0.29276	0.0137677
Rv2297	1472.19	0.00297617	0.0614011	0.0484709	0.961341	0.3525	0.00268171
Rv2298	2339.29	0.188621	0.0553684	3.40666	0.000657629	0.000883278	0.174076
Rv2300c	1156.22	0.13919	0.0748653	1.8592	0.0629981	0.0421892	0.120377
Rv2302	2243.25	0.0751513	0.0653143	1.15061	0.249892	0.129128	0.0669433
Rv2303c	3135.4	-0.0965831	0.0635329	-1.52021	0.128459	0.0754409	-0.0865945
Rv2304c	260.541	-0.0334745	0.0995786	-0.336161	0.736749	0.292583	-0.0261567
Rv2305	472.479	0.261656	0.119625	2.1873	0.0287204	0.0219465	0.191684
Rv2306A	165.043	0.311954	0.131364	2.37472	0.0175621	0.0145627	0.219076
Rv2306B	140.19	0.385591	0.126104	3.05771	0.00223032	0.00255914	0.282679
Rv2307A	169.33	-0.651229	0.202282	-3.21941	0.00128453	0.00157955	-0.385456
Rv2307B	292.204	-0.483146	0.154366	-3.12988	0.00174878	0.00208462	-0.323417
Rv2307D	498.77	-0.447531	0.130174	-3.43795	0.000586133	0.000797658	-0.329093
Rv2307c	365.901	0.0483906	0.106114	0.456023	0.648373	0.266688	0.0367865
Rv2308	449.467	-0.427985	0.129574	-3.30303	0.000956474	0.00122939	-0.313302
Rv2309A	79.124	0.0370032	0.17968	0.20594	0.836838	0.319962	0.0199774
Rv2309c	1123.68	0.0835982	0.14105	0.592684	0.553393	0.238463	0.0543251
Rv2311	251.451	-0.00282999	0.179303	-0.0157833	0.987407	0.358716	-0.0015299
Rv2312	492.011	-0.222934	0.153098	-1.45616	0.145349	0.0836219	-0.138984
Rv2313c	2585.45	0.0409107	0.0447176	0.914868	0.360261	0.17124	0.0386441
Rv2314c	2345.7	0.140592	0.0666486	2.10945	0.034906	0.0258508	0.125049
Rv2315c	1589.8	-0.0776765	0.0443759	-1.75042	0.0800458	0.0514081	-0.0734707
Rv2319c	231.686	0.286159	0.171356	1.66997	0.094926	0.0586871	0.165493
Rv2323c	529.382	0.345367	0.0847057	4.07726	4.55691e-05	8.43042e-05	0.29562
Rv2324	319.042	0.0943661	0.0912157	1.03454	0.300885	0.148604	0.0764971
Rv2325c	2151.08	0.237298	0.0578293	4.10341	4.07102e-05	7.64934e-05	0.218208
Rv2326c	4850.96	0.274976	0.0584245	4.70652	2.51987e-06	6.2398e-06	0.253202
Rv2327	1051.98	0.310616	0.0708813	4.3822	1.1749e-05	2.54557e-05	0.276829
Rv2331	1392.39	-0.0901553	0.0886308	-1.0172	0.309058	0.151293	-0.0738242
Rv2331A	495.558	0.057406	0.0870954	0.659117	0.509821	0.224012	0.0472287
Rv2336	3497.64	-0.369705	0.0620018	-5.96281	2.47941e-09	1.12015e-08	-0.340416
Rv2337c	3702.87	-0.192108	0.052991	-3.62531	0.00028862	0.000430592	-0.178477
Rv2342	876.608	0.00833517	0.0640664	0.130102	0.896486	0.336807	0.00744676
Rv2345	5035.12	0.218758	0.0838073	2.61025	0.00904771	0.00841247	0.184454
Rv2348c	7046.75	0.101775	0.0850283	1.19695	0.231325	0.122072	0.084573
Rv2354	1496.88	0.156108	0.322291	0.484369	0.628124	0.260875	0.0451149
Rv2355	7016.46	-0.138896	0.0825995	-1.68156	0.0926533	0.057855	-0.116772
Rv2360c	1057.65	-0.148214	0.0749916	-1.97641	0.0481082	0.0338537	-0.128203
Rv2361c	1735.21	-0.192927	0.0468283	-4.11988	3.79064e-05	7.16926e-05	-0.182062
Rv2365c	184.304	0.281662	0.124426	2.2637	0.0235927	0.018641	0.202755
Rv2366c	3636.59	0.0451107	0.0684434	0.659095	0.509835	0.224012	0.0397366
Rv2367c	2657.25	-0.073069	0.0693767	-1.05322	0.29224	0.144981	-0.0642059
Rv2369c	360.001	-0.135697	0.102446	-1.32457	0.185314	0.102365	-0.105325
Rv2372c	1730.73	0.20351	0.0780999	2.60576	0.00916699	0.00851787	0.174911
Rv2375	7442.49	0.0170579	0.0495951	0.343943	0.730889	0.29083	0.01591
Rv2387	3408.89	-0.118375	0.0391573	-3.02307	0.00250227	0.00282439	-0.113395
Rv2390c	1000.48	-0.188192	0.0660649	-2.8486	0.00439121	0.00459252	-0.16823
Rv2395	4547.48	0.0029229	0.0394307	0.0741275	0.940909	0.3485	0.00279465
Rv2401	422.504	-0.304126	0.091091	-3.3387	0.000841707	0.00109877	-0.25256
Rv2401A	72.4478	-0.0333797	0.211806	-0.157596	0.874775	0.330677	-0.0154843
Rv2402	3232.04	0.0963322	0.054141	1.77928	0.0751933	0.0487918	0.0888492
Rv2405	1701.74	0.183999	0.0618872	2.97313	0.0029478	0.0032654	0.166581
Rv2406c	3942.87	0.163848	0.062054	2.64041	0.00828066	0.00782902	0.148073
Rv2407	196.499	0.044233	0.154005	0.287218	0.773945	0.30326	0.0269912
Rv2409c	1244.28	0.0743623	0.0668247	1.1128	0.265796	0.1352	0.0659096
Rv2410c	2009.9	0.0173861	0.0713132	0.243799	0.807387	0.311786	0.0151583
Rv2411c	3678.81	-0.0598384	0.0605914	-0.987573	0.323362	0.156488	-0.0540909
Rv2413c	1789.6	-0.0403342	0.0705723	-0.57153	0.56764	0.242898	-0.0352673
Rv2414c	1530.9	0.293	0.0604303	4.84857	1.24354e-06	3.32498e-06	0.268751
Rv2415c	197.314	-0.65614	0.153856	-4.26465	2.00215e-05	4.04124e-05	-0.491033
Rv2417c	1032.99	0.325786	0.0758489	4.2952	1.74536e-05	3.5883e-05	0.286389
Rv2418c	961.896	-0.0720518	0.0635122	-1.13446	0.256603	0.132028	-0.0645526
Rv2420c	602.352	-0.094393	0.0769789	-1.22622	0.220116	0.117535	-0.0808142
Rv2422	54.5123	0.636477	0.253869	2.50711	0.0121724	0.0108087	0.286907
Rv2423	442.143	-0.317636	0.123431	-2.57339	0.0100709	0.00921517	-0.231454
Rv2424c	848.621	-0.0191605	0.131764	-0.145415	0.884383	0.333303	-0.0129717
Rv2425c	1881.87	0.0118748	0.0397169	0.298987	0.76495	0.30088	0.0113467
Rv2426c	1409.84	0.178177	0.0839076	2.12349	0.0337124	0.0251178	0.149549
Rv2432c	280.339	-0.119036	0.1476	-0.806476	0.419968	0.192938	-0.0751963
Rv2433c	74.6062	0.178373	0.192779	0.92527	0.354825	0.16891	0.091428
Rv2434c	1035.46	0.0614728	0.0778362	0.789771	0.429661	0.196577	0.0523981
Rv2435c	2031.7	-0.096957	0.0780336	-1.2425	0.214051	0.11502	-0.0826999
Rv2437	429.698	-0.450218	0.111359	-4.04295	5.27818e-05	9.58032e-05	-0.35825
Rv2438A	94.3255	-0.261028	0.166508	-1.56766	0.11696	0.0696815	-0.153704
Rv2446c	579.38	0.0876115	0.0853524	1.02647	0.304671	0.14996	0.0726592
Rv2449c	1689.24	0.307375	0.0589155	5.21723	1.8162e-07	5.80367e-07	0.28348
Rv2451	356.923	-0.575268	0.245918	-2.33927	0.0193214	0.0158033	-0.259275
Rv2452c	100.513	-0.603021	0.223122	-2.70266	0.00687879	0.00672104	-0.309592
Rv2454c	6804.97	-0.113608	0.0614512	-1.84875	0.0644943	0.0428857	-0.102598
Rv2455c	14600.2	-0.316059	0.0633216	-4.99132	5.99674e-07	1.72847e-06	-0.28824
Rv2456c	2732.95	-0.00348532	0.0425692	-0.0818743	0.934747	0.347199	-0.00330864
Rv2459	8709.61	-0.0287192	0.054518	-0.526785	0.598343	0.251771	-0.0264249
Rv2464c	1604.57	-0.108476	0.0514827	-2.10704	0.0351144	0.0259784	-0.100825
Rv2466c	926.514	-0.53445	0.138396	-3.86176	0.000112575	0.000186645	-0.394441
Rv2468A	385.315	-0.115735	0.106923	-1.08242	0.279066	0.140392	-0.087989
Rv2468c	2411.54	0.226068	0.0876575	2.579	0.00990874	0.00907256	0.188044
Rv2469c	1509.65	0.00268586	0.0473245	0.0567541	0.954741	0.351507	0.00251999
Rv2472	785.961	-0.129784	0.102759	-1.26299	0.206594	0.111587	-0.100552
Rv2473	1127.26	0.037496	0.0561103	0.668255	0.503971	0.221909	0.0343441
Rv2474c	2162.31	0.0278122	0.0506351	0.549267	0.582822	0.246971	0.0258697
Rv2475c	1676.59	0.153593	0.0765666	2.00601	0.0448555	0.0319548	0.132165
Rv2477c	8822.44	-0.0215694	0.0382536	-0.563853	0.572854	0.244472	-0.0206767
Rv2478c	186.392	0.133211	0.153141	0.869861	0.384376	0.180499	0.0820768
Rv2479c	7013.62	-0.138829	0.0826107	-1.68052	0.0928568	0.057957	-0.11671
Rv2480c	1506.47	0.154329	0.324077	0.47621	0.633925	0.261625	0.0442796
Rv2481c	325.084	-0.080678	0.101482	-0.794999	0.426614	0.195431	-0.0626419
Rv2484c	5617.64	0.136096	0.0652885	2.08453	0.0371117	0.0271908	0.121555
Rv2488c	1194.03	0.15776	0.051299	3.0753	0.00210294	0.00243235	0.146976
Rv2489c	61.8288	0.125697	0.223481	0.562451	0.573809	0.244735	0.055489
Rv2491	89.9241	-0.407461	0.234637	-1.73656	0.0824646	0.0527079	-0.180022
Rv2492	260.423	-0.637219	0.14733	-4.3251	1.52465e-05	3.20305e-05	-0.48322
Rv2499c	1791.64	-0.162713	0.0556608	-2.9233	0.00346337	0.00374724	-0.149832
Rv2506	543.595	-0.0536591	0.105123	-0.51044	0.609743	0.254862	-0.0409734
Rv2507	2875.1	0.00708847	0.0554625	0.127806	0.898302	0.33714	0.00650353
Rv2508c	1851.55	0.0262986	0.0638048	0.412172	0.680213	0.276142	0.0235184
Rv2509	2509.2	-0.0402162	0.0359469	-1.11877	0.263239	0.134482	-0.0387413
Rv2510c	1740.73	-0.0052707	0.0504676	-0.104437	0.916822	0.342572	-0.0049043
Rv2512c	16252.8	-0.24947	0.0903381	-2.76151	0.00575339	0.00578621	-0.206025
Rv2513	1761	-0.554744	0.0596275	-9.30349	1.35912e-20	2.2776e-19	-0.527358
Rv2514c	471.507	-0.687971	0.148825	-4.62269	3.78792e-06	9.12884e-06	-0.539143
Rv2515c	616.523	-0.631565	0.0969899	-6.51166	7.43247e-11	4.1198e-10	-0.566412
Rv2516c	4860	-0.374639	0.112745	-3.32289	0.000890888	0.00115565	-0.289869
Rv2517c	1269.21	-0.290582	0.137145	-2.1188	0.0341072	0.0253243	-0.197779
Rv2520c	599.259	-0.28178	0.0941492	-2.99291	0.00276327	0.00308232	-0.230426
Rv2522c	1408.38	0.157518	0.0542147	2.90544	0.00366732	0.00392372	0.145597
Rv2525c	1927.54	-0.268701	0.050169	-5.35591	8.51259e-08	2.88661e-07	-0.252596
Rv2529	230.947	0.281264	0.177305	1.58633	0.112665	0.0676826	0.157917
Rv2531c	6008.74	-0.154247	0.0456464	-3.37917	0.000727062	0.000966626	-0.145746
Rv2532c	806.444	0.238413	0.0561688	4.24457	2.19012e-05	4.37772e-05	0.220253
Rv2536	2799.51	0.121648	0.0613846	1.98173	0.0475091	0.0334811	0.10992
Rv2542	2429.8	0.146435	0.0552674	2.64958	0.00805922	0.00767663	0.134886
Rv2548A	1162.36	-0.135844	0.082809	-1.64045	0.100912	0.0618859	-0.114091
Rv2551c	172.988	0.475272	0.124942	3.80394	0.00014241	0.000230605	0.361265
Rv2553c	4952.98	0.00131831	0.0331416	0.0397781	0.96827	0.354174	0.00127679
Rv2554c	672.968	0.280702	0.113205	2.47958	0.0131538	0.011503	0.212231
Rv2556c	2715.48	0.126506	0.0640807	1.97416	0.0483632	0.0339833	0.113371
Rv2557	6164.01	0.161324	0.0702735	2.29565	0.0216957	0.0173849	0.141962
Rv2558	7438.02	0.348575	0.0891613	3.90949	9.24931e-05	0.000157007	0.293867
Rv2559c	1312.72	0.0197577	0.100904	0.195806	0.844762	0.322332	0.0153489
Rv2560	1065.64	-0.360923	0.0710201	-5.08198	3.73524e-07	1.12383e-06	-0.323697
Rv2561	585.996	-0.52139	0.0784914	-6.64264	3.0812e-11	1.79054e-10	-0.47238
Rv2562	480.858	-0.454456	0.139082	-3.26755	0.00108483	0.00137505	-0.322171
Rv2563	1850.56	-0.123649	0.0462055	-2.67607	0.0074492	0.00718099	-0.116559
Rv2565	3579.6	0.027799	0.0525071	0.529432	0.596505	0.251218	0.0257243
Rv2566	1701.77	0.23181	0.0588014	3.94225	8.07211e-05	0.000140499	0.212494
Rv2567	3215.07	0.0959607	0.0367339	2.61232	0.00899301	0.00837711	0.0923505
Rv2568c	1309.66	-0.110044	0.0538053	-2.04523	0.0408319	0.0295115	-0.101636
Rv2569c	611.243	-0.0181491	0.083199	-0.218141	0.827319	0.317019	-0.0151472
Rv2570	236.786	-0.273788	0.10121	-2.70514	0.00682756	0.00667924	-0.217399
Rv2571c	941.295	0.0407829	0.0550125	0.741338	0.458488	0.205845	0.0374763
Rv2573	133.135	0.511436	0.142398	3.59158	0.000328674	0.000484827	0.366527
Rv2574	879.593	-0.0057596	0.0699522	-0.0823363	0.934379	0.347152	-0.00504509
Rv2575	2696.24	-0.0422976	0.0556042	-0.760691	0.446842	0.202445	-0.0388021
Rv2576c	5027.06	0.112169	0.0811901	1.38157	0.167105	0.0939632	0.0946379
Rv2577	502.892	0.0742924	0.201349	0.368972	0.712148	0.284971	0.0362452
Rv2578c	353.151	0.424605	0.105569	4.02205	5.76943e-05	0.000104064	0.342809
Rv2581c	880.284	0.00608218	0.0674367	0.090191	0.928135	0.345813	0.00537358
Rv2585c	3556.6	0.0524119	0.0760304	0.689354	0.4906	0.217083	0.0449595
Rv2597	1254.84	0.0111915	0.058939	0.189883	0.849401	0.323662	0.0101619
Rv2598	312.515	0.157571	0.0964093	1.6344	0.102175	0.0625272	0.125662
Rv2599	494.951	0.226328	0.0777292	2.91176	0.00359403	0.00385676	0.195236
Rv2600	1964.13	0.552249	0.108094	5.10896	3.23931e-07	9.80758e-07	0.462654
Rv2603c	3492.92	-0.127853	0.0415136	-3.07978	0.00207154	0.00240375	-0.121872
Rv2609c	2162.03	0.34377	0.0684346	5.02334	5.07802e-07	1.48144e-06	0.309952
Rv2611c	1315.32	0.143623	0.0905173	1.5867	0.112582	0.0676604	0.117146
Rv2613c	1250.98	-0.0970096	0.0665711	-1.45723	0.145052	0.0834894	-0.0861241
Rv2614A	54.2452	0.456364	0.244109	1.86951	0.0615519	0.0413745	0.196167
Rv2616	346.52	0.184755	0.0900646	2.05136	0.0402322	0.0291365	0.151544
Rv2617c	700.672	-0.151765	0.102006	-1.48781	0.136802	0.0796267	-0.118187
Rv2618	348.279	0.231476	0.0956308	2.42051	0.0154986	0.0131544	0.186774
Rv2619c	480.684	0.154669	0.115712	1.33667	0.181331	0.100588	0.113546
Rv2620c	527.555	0.259382	0.154166	1.68249	0.0924743	0.0577683	0.161944
Rv2621c	546.517	0.455706	0.114481	3.98062	6.87366e-05	0.000122147	0.358841
Rv2622	296.156	-0.0301028	0.205656	-0.146374	0.883626	0.333204	-0.0143706
Rv2624c	12351	-2.77303	0.313778	-8.83757	9.7822e-19	1.43856e-17	-2.66919
Rv2625c	13073.6	-2.93756	0.365486	-8.03739	9.17721e-16	8.70128e-15	-2.79157
Rv2627c	8409.31	-2.61888	0.270131	-9.69484	3.17145e-22	5.78558e-21	-2.54477
Rv2628	3348.32	-2.64056	0.264052	-10.0001	1.52186e-23	3.37425e-22	-2.56921
Rv2629	24829.4	-2.3549	0.195559	-12.0419	2.13863e-33	8.5615e-32	-2.31882
Rv2630	4721.24	-2.31883	0.153167	-15.1392	8.9248e-52	1.07185e-49	-2.29686
Rv2631	10395.7	-0.79246	0.0957722	-8.27442	1.29078e-16	1.38824e-15	-0.753952
Rv2632c	4935.04	-0.203946	0.0552879	-3.6888	0.000225314	0.000345076	-0.188432
Rv2633c	6189.12	-0.271812	0.0777637	-3.49536	0.000473418	0.000666286	-0.235696
Rv2636	483.645	0.0633548	0.074261	0.853137	0.393583	0.183686	0.0547109
Rv2638	1663.56	0.0498515	0.0726515	0.686173	0.492604	0.217836	0.0432814
Rv2639c	673.859	0.0446755	0.0862157	0.518183	0.604331	0.253403	0.0368689
Rv2640c	318.597	0.0574518	0.103747	0.553767	0.579738	0.246098	0.0441353
Rv2642	1498.42	-0.387192	0.161952	-2.39079	0.016812	0.0140377	-0.240753
Rv2644c	296.938	-0.265517	0.0975098	-2.72297	0.00646975	0.0063907	-0.21371
Rv2645	92.7472	0.160298	0.163827	0.978457	0.327848	0.158234	0.0941345
Rv2646	441.938	0.247477	0.101774	2.43165	0.0150304	0.012863	0.195223
Rv2647	192.12	0.0202036	0.147186	0.137265	0.890821	0.335203	0.0127258
Rv2648	1506.47	0.154329	0.324077	0.47621	0.633925	0.261625	0.0442796
Rv2649	7014.56	-0.138872	0.0827348	-1.67852	0.0932465	0.0580996	-0.116692
Rv2650c	1216.95	-0.0776357	0.0869611	-0.892764	0.371984	0.175802	-0.0639543
Rv2651c	1607.02	-0.364036	0.0923556	-3.94168	8.09138e-05	0.000140664	-0.304291
Rv2652c	303.284	0.113138	0.194368	0.582083	0.56051	0.240702	0.0571848
Rv2653c	36.9213	0.304417	0.410399	0.741759	0.458233	0.205845	0.0645463
Rv2655c	411.361	0.136319	0.0932054	1.46256	0.143587	0.0827877	0.109934
Rv2656c	1055.81	0.34077	0.073135	4.65946	3.17034e-06	7.75724e-06	0.302797
Rv2657c	1206.16	0.0545575	0.138907	0.392762	0.694495	0.279734	0.0357605
Rv2658c	680.305	-0.121756	0.108076	-1.12658	0.25992	0.133164	-0.0921486
Rv2659c	1308.17	0.161258	0.134012	1.20332	0.228854	0.121168	0.10902
Rv2660c	3474.29	-0.653863	0.201539	-3.24436	0.00117716	0.00147184	-0.389341
Rv2661c	375.223	-0.684582	0.128884	-5.31161	1.08658e-07	3.62489e-07	-0.575496
Rv2662	312.844	-0.326668	0.0980264	-3.33245	0.000860864	0.00112276	-0.265257
Rv2663	544.984	-0.134645	0.108432	-1.24174	0.214333	0.115129	-0.101855
Rv2664	543.038	0.0325238	0.079764	0.40775	0.683457	0.276835	0.0275057
Rv2665	2156.06	-0.0545952	0.102047	-0.535001	0.592649	0.249886	-0.0422418
Rv2666	1589.11	-0.0895862	0.122213	-0.733033	0.463538	0.207659	-0.0635323
Rv2668	256.898	0.348005	0.139786	2.48957	0.0127899	0.0112325	0.237306
Rv2669	227.719	-0.301431	0.111414	-2.70551	0.00681995	0.00667712	-0.23059
Rv2670c	400.254	-0.203823	0.104802	-1.94485	0.0517934	0.0358015	-0.157788
Rv2672	1980.96	0.114766	0.0627072	1.83018	0.0672225	0.0445217	0.103242
Rv2675c	1514.56	-0.0208278	0.0516898	-0.402939	0.686993	0.278033	-0.0193163
Rv2676c	965.365	0.107421	0.0532131	2.0187	0.0435184	0.03118	0.0993692
Rv2680	1570.83	0.0744345	0.0619711	1.20112	0.229706	0.121351	0.0670194
Rv2681	2449.24	0.0123804	0.0699946	0.176876	0.859606	0.326268	0.0108432
Rv2683	1542.66	-0.30821	0.0650322	-4.73935	2.14404e-06	5.38315e-06	-0.279475
Rv2686c	1915.28	-0.176985	0.0617292	-2.86711	0.00414233	0.00435117	-0.160234
Rv2687c	1405.99	-0.203252	0.0714609	-2.84424	0.00445182	0.00465253	-0.178738
Rv2688c	2283.83	-0.0373313	0.0729783	-0.51154	0.608973	0.254756	-0.0323656
Rv2689c	509.257	0.407286	0.110236	3.69468	0.000220163	0.000338626	0.321239
Rv2690c	1828.93	0.157647	0.0758386	2.07871	0.0376439	0.0275109	0.136046
Rv2693c	2628.76	-0.252859	0.0652205	-3.87698	0.000105759	0.000176613	-0.22787
Rv2694c	3241.94	-0.27184	0.0973229	-2.79318	0.00521934	0.00532717	-0.219185
Rv2695	227.8	0.328855	0.101264	3.24749	0.00116429	0.00146035	0.263766
Rv2696c	3547.54	0.369889	0.0617535	5.98976	2.10152e-09	9.58437e-09	0.340813
Rv2698	1546.45	-0.30622	0.0670448	-4.56739	4.93824e-06	1.15671e-05	-0.275972
Rv2699c	970.219	-0.24979	0.0700263	-3.56708	0.000360979	0.000527085	-0.221683
Rv2700	1425.95	-0.0247975	0.0716871	-0.345913	0.729408	0.290388	-0.0215933
Rv2704	1410.74	-0.356108	0.0746474	-4.77054	1.83734e-06	4.70325e-06	-0.31565
Rv2705c	604.089	-0.148439	0.0620153	-2.39358	0.0166848	0.0139557	-0.134045
Rv2706c	1771.22	0.0494651	0.143837	0.343897	0.730924	0.29083	0.0316754
Rv2707	5608.42	-0.65586	0.0739711	-8.86643	7.55281e-19	1.13385e-17	-0.621885
Rv2708c	1421.39	-0.0370697	0.0689438	-0.537681	0.590798	0.249324	-0.0325933
Rv2709	1416.25	0.0422821	0.100224	0.421876	0.673115	0.273955	0.032956
Rv2712c	2624.43	-0.140717	0.084934	-1.65678	0.0975635	0.0600329	-0.117275
Rv2714	4000.22	-0.143007	0.0360676	-3.96497	7.34051e-05	0.000128854	-0.137933
Rv2715	9053.4	-0.0321004	0.0668806	-0.479966	0.631252	0.261625	-0.0284195
Rv2716	2206.72	-0.103249	0.0611355	-1.68886	0.0912471	0.0572997	-0.0932955
Rv2717c	775.001	-0.320111	0.0659988	-4.85026	1.23302e-06	3.30911e-06	-0.28984
Rv2719c	353.194	-0.725416	0.0974381	-7.4449	9.70204e-14	7.59909e-13	-0.674717
Rv2721c	15314.8	-0.0616464	0.0637708	-0.966687	0.333701	0.160521	-0.0551692
Rv2722	526.118	-0.0962932	0.088581	-1.08706	0.277009	0.139729	-0.0788912
Rv2723	2527.49	-0.290823	0.102635	-2.83355	0.00460336	0.00478371	-0.230278
Rv2728c	215.859	0.156908	0.110551	1.41933	0.155803	0.0887858	0.11786
Rv2729c	1347.18	-0.181305	0.0623568	-2.90754	0.00364283	0.00390041	-0.163878
Rv2730	86.4893	0.122996	0.291422	0.422056	0.672984	0.273955	0.0402238
Rv2731	1735.26	0.229279	0.0794622	2.88538	0.00390942	0.00414581	0.196636
Rv2732c	998.248	0.360041	0.0825949	4.35912	1.30587e-05	2.79642e-05	0.311217
Rv2733c	1554.33	-7.76551e-05	0.0505643	-0.00153577	0.998775	0.361206	-7.22375e-05
Rv2734	994.882	-1.11191	0.0770411	-14.4327	3.22014e-47	3.09385e-45	-1.10125
Rv2735c	681.733	-0.914745	0.148445	-6.16217	7.17547e-10	3.54147e-09	-0.83528
Rv2737A	219.083	0.0169367	0.11566	0.146435	0.883578	0.333204	0.0123379
Rv2738c	236.257	0.118452	0.111768	1.0598	0.289234	0.143985	0.0881928
Rv2739c	420.656	0.6715	0.103753	6.47211	9.66451e-11	5.21657e-10	0.602609
Rv2742c	1069.97	0.0969159	0.053579	1.80884	0.0704759	0.0461385	0.0895307
Rv2743c	1872.22	0.111374	0.0694778	1.60301	0.108932	0.0658241	0.0979811
Rv2749	471.998	0.292171	0.0769264	3.79806	0.000145831	0.000235614	0.254742
Rv2750	1591.16	0.30737	0.0677674	4.53566	5.74227e-06	1.33048e-05	0.276447
Rv2751	2503.84	-0.0752684	0.0720539	-1.04461	0.296202	0.146694	-0.0655339
Rv2752c	5889.9	-0.0555215	0.0365144	-1.52054	0.128376	0.0754227	-0.0534298
Rv2762c	260.089	0.382795	0.129776	2.94966	0.00318127	0.00349183	0.275888
Rv2765	360.13	-0.190487	0.0837309	-2.27499	0.0229063	0.0181985	-0.160178
Rv2766c	848.805	0.147351	0.0786921	1.8725	0.061138	0.0411924	0.125766
Rv2767c	91.5985	-0.110752	0.164915	-0.671571	0.501857	0.221181	-0.0643956
Rv2771c	1310.44	-0.0592034	0.0554679	-1.06735	0.285816	0.142777	-0.0543475
Rv2772c	1129.98	0.078558	0.0845456	0.929179	0.352796	0.168135	0.0653277
Rv2774c	831.266	0.302969	0.110634	2.7385	0.00617211	0.00614301	0.232606
Rv2775	1891.32	-0.292317	0.069383	-4.21309	2.51904e-05	4.95275e-05	-0.26116
Rv2776c	1908.02	0.165265	0.0606192	2.72628	0.00640518	0.0063356	0.150019
Rv2777c	4340.15	-0.0489335	0.0688254	-0.71098	0.477096	0.212347	-0.0430513
Rv2778c	3043.43	-0.212326	0.048972	-4.33566	1.45321e-05	3.0799e-05	-0.199517
Rv2779c	759.794	-0.143204	0.072896	-1.9645	0.0494726	0.0344781	-0.124739
Rv2781c	2704.87	-0.169483	0.0679581	-2.49394	0.0126333	0.0111561	-0.150379
Rv2787	1128.84	-0.22951	0.0847467	-2.70819	0.00676506	0.00663239	-0.193089
Rv2791c	7256.81	-0.00954517	0.109336	-0.0873017	0.930432	0.346357	-0.00715007
Rv2792c	1641.47	-0.174463	0.0693141	-2.517	0.011836	0.0106014	-0.154163
Rv2795c	1999.32	0.0928725	0.0486172	1.91028	0.0560971	0.0382792	0.0869433
Rv2797c	740.985	0.327217	0.0720218	4.5433	5.53809e-06	1.28524e-05	0.291218
Rv2798c	644.516	0.095597	0.0726124	1.31654	0.187993	0.103607	0.0831368
Rv2799	1189.56	0.263941	0.066557	3.96563	7.32024e-05	0.000128655	0.237145
Rv2800	1747.66	0.342477	0.0832145	4.11559	3.86192e-05	7.28494e-05	0.294513
Rv2802c	312.583	0.472159	0.0972457	4.85532	1.20192e-06	3.23771e-06	0.398583
Rv2803	187.668	0.325051	0.177857	1.8276	0.0676099	0.0447167	0.183895
Rv2804c	81.6152	0.362845	0.214991	1.68772	0.0914646	0.0573863	0.17356
Rv2805	63.2296	0.220753	0.212178	1.04041	0.298148	0.147455	0.103833
Rv2806	151.729	0.154795	0.142424	1.08686	0.277098	0.139729	0.100549
Rv2807	211.004	0.160753	0.312578	0.514283	0.607054	0.254175	0.0483207
Rv2808	536.297	-0.492161	0.105213	-4.67776	2.90019e-06	7.14474e-06	-0.406658
Rv2809	1038.35	-0.591719	0.103287	-5.72887	1.01102e-08	4.16302e-08	-0.512415
Rv2810c	969.045	-0.433266	0.143997	-3.00885	0.00262236	0.00295256	-0.297899
Rv2811	38.9662	0.839477	0.530299	1.58303	0.113415	0.0679747	0.14037
Rv2814c	7013.98	-0.138682	0.0828131	-1.67464	0.0940053	0.0582952	-0.116496
Rv2815c	1506.47	0.154329	0.324077	0.47621	0.633925	0.261625	0.0442796
Rv2816c	7122.36	-0.854752	0.0770936	-11.0872	1.44747e-28	4.34595e-27	-0.835628
Rv2817c	15407.7	-0.607555	0.0731258	-8.30835	9.7041e-17	1.07907e-15	-0.569857
Rv2818c	1421.42	-0.397721	0.0835979	-4.75755	1.95957e-06	4.98954e-06	-0.345077
Rv2819c	1449.27	-0.430241	0.061331	-7.01507	2.29837e-12	1.51249e-11	-0.399838
Rv2820c	751.813	-0.434788	0.0889065	-4.8904	1.00633e-06	2.76774e-06	-0.373713
Rv2821c	857.538	-0.381968	0.090786	-4.20734	2.58394e-05	5.05965e-05	-0.322302
Rv2822c	478.97	-0.326217	0.108734	-3.00015	0.00269849	0.00302864	-0.253687
Rv2823c	1707.34	-0.383591	0.0999258	-3.83876	0.000123656	0.000202511	-0.313057
Rv2824c	628.929	-0.404191	0.075269	-5.36996	7.87561e-08	2.68324e-07	-0.360399
Rv2825c	853.242	0.231297	0.0869368	2.66052	0.00780204	0.00746705	0.193044
Rv2826c	833.768	0.161002	0.0780096	2.06388	0.0390293	0.0284512	0.137901
Rv2827c	1434.98	0.0212014	0.076423	0.277421	0.781457	0.305207	0.0181506
Rv2828A	156.01	0.306063	0.142533	2.14732	0.0317681	0.0239203	0.203883
Rv2828c	487.131	0.325226	0.0818168	3.97505	7.03645e-05	0.000124579	0.280231
Rv2837c	2963.96	0.146676	0.0751768	1.95109	0.0510467	0.0353688	0.126776
Rv2840c	6430.11	0.0996446	0.026814	3.71614	0.000202289	0.000315512	0.0976078
Rv2842c	3186.68	-0.147895	0.0623816	-2.37082	0.0177488	0.0147006	-0.133399
Rv2843	508.875	0.248976	0.121251	2.05339	0.0400346	0.0290226	0.180675
Rv2844	853.319	0.16166	0.0694062	2.32919	0.0198489	0.0160978	0.142676
Rv2850c	2106.03	0.444742	0.0703919	6.31809	2.64814e-10	1.39286e-09	0.404903
Rv2851c	1690.63	0.0390558	0.0517139	0.755228	0.450112	0.203351	0.0362248
Rv2854	577.411	-0.176957	0.102558	-1.72543	0.0844493	0.0537809	-0.137844
Rv2857c	1434.97	0.0194322	0.0485741	0.400052	0.689118	0.278502	0.0181738
Rv2859c	773.494	0.379902	0.0750896	5.05932	4.20763e-07	1.24006e-06	0.337541
Rv2862c	532.42	0.44849	0.0848915	5.2831	1.27016e-07	4.17928e-07	0.391808
Rv2864c	1098.59	-0.159749	0.0828653	-1.92782	0.0538778	0.0371163	-0.134388
Rv2867c	6218.65	0.177859	0.0819801	2.16954	0.0300419	0.0228111	0.150356
Rv2876	1381.6	-0.194148	0.0726291	-2.67314	0.00751458	0.00723918	-0.169925
Rv2877c	1668.2	0.0980837	0.0484247	2.02549	0.0428174	0.0307155	0.0918794
Rv2879c	3411.42	-0.106946	0.0958968	-1.11522	0.264757	0.134936	-0.0851247
Rv2880c	757.055	0.0980825	0.0909707	1.07818	0.280955	0.140905	0.0796045
Rv2884	1253.38	-0.162772	0.0711869	-2.28655	0.0222221	0.017733	-0.14281
Rv2885c	1669.65	-0.616822	0.0734645	-8.39619	4.61186e-17	5.28173e-16	-0.579567
Rv2887	759.598	-0.120695	0.0898117	-1.34386	0.178993	0.0995947	-0.0985499
Rv2891	30.219	0.103312	0.277295	0.372573	0.709466	0.284176	0.0358267
Rv2893	161.53	0.381598	0.112587	3.38936	0.00070056	0.000935707	0.295993
Rv2896c	735.437	0.328904	0.0810629	4.05739	4.96244e-05	9.07824e-05	0.284297
Rv2897c	118.97	0.376684	0.285431	1.3197	0.186934	0.103102	0.131141
Rv2898c	574.537	0.0358873	0.0987013	0.363596	0.71616	0.28622	0.028147
Rv2901c	5370	-0.154323	0.0359201	-4.2963	1.73675e-05	3.58076e-05	-0.14893
Rv2908c	639.698	0.00171139	0.103163	0.0165892	0.986764	0.358573	0.00131662
Rv2910c	429.594	-0.0945639	0.13611	-0.694759	0.487207	0.215847	-0.0629296
Rv2912c	2641.63	0.15439	0.302897	0.509712	0.610254	0.254922	0.0482524
Rv2913c	8758.99	-0.29806	0.315491	-0.944749	0.344787	0.164973	-0.0900242
Rv2915c	1150.54	0.166842	0.0473759	3.52166	0.000428862	0.000611339	0.157061
Rv2917	537.56	0.34206	0.15618	2.19017	0.0285121	0.021822	0.215655
Rv2923c	286.369	0.254763	0.103722	2.45621	0.0140411	0.0121535	0.199588
Rv2926c	3501.9	-0.207252	0.0786566	-2.6349	0.00841622	0.00793075	-0.17784
Rv2927c	4814.55	-0.551823	0.0463201	-11.9132	1.00977e-32	3.63814e-31	-0.5353
Rv2929	971.875	-0.290388	0.0684811	-4.24041	2.23111e-05	4.45349e-05	-0.260102
Rv2943	389.914	0.25704	0.156444	1.64301	0.100381	0.0616125	0.158681
Rv2944	507.673	-0.0566086	0.0726891	-0.778778	0.436111	0.199211	-0.0491496
Rv2949c	9196.46	-0.0775094	0.0701524	-1.10487	0.269215	0.136604	-0.0679369
Rv2951c	7570.2	0.0896174	0.0611345	1.46591	0.142674	0.0823131	0.0809391
Rv2952	4730.79	-0.178788	0.0384129	-4.65436	3.24983e-06	7.91143e-06	-0.171801
Rv2953	4488.11	-0.0614896	0.036195	-1.69884	0.0893491	0.0562795	-0.059215
Rv2954c	6912.13	-0.311687	0.0386591	-8.06246	7.4777e-16	7.23266e-15	-0.300898
Rv2955c	1111.46	0.142361	0.0580422	2.45272	0.0141782	0.0122428	0.130064
Rv2956	1158.73	-0.45803	0.111787	-4.09736	4.17892e-05	7.79113e-05	-0.364819
Rv2957	899.998	-0.397438	0.107832	-3.68572	0.000228055	0.000348165	-0.315629
Rv2958c	1388.7	0.116043	0.122166	0.949885	0.342171	0.163993	0.0824667
Rv2959c	3220.8	-0.226674	0.0883136	-2.5667	0.0102672	0.00937696	-0.188091
Rv2960c	412.695	-0.154218	0.115723	-1.33265	0.182646	0.101201	-0.113204
Rv2961	307.149	-0.238397	0.237729	-1.00281	0.315953	0.153925	-0.0998665
Rv2962c	1550.57	-0.489648	0.09169	-5.34025	9.28186e-08	3.12541e-07	-0.42326
Rv2963	9071.52	-1.17274	0.220133	-5.32741	9.96221e-08	3.3389e-07	-1.05856
Rv2966c	451.711	0.472708	0.0879751	5.3732	7.73513e-08	2.64621e-07	0.41148
Rv2968c	2503.81	-0.0494777	0.0497632	-0.994262	0.320095	0.155272	-0.046141
Rv2969c	6525.85	-0.0805746	0.0609186	-1.32266	0.185948	0.102676	-0.0728003
Rv2970A	939.912	-0.342753	0.0657976	-5.2092	1.89654e-07	6.03364e-07	-0.311352
Rv2971	3701.42	-0.217698	0.0527905	-4.1238	3.72669e-05	7.07616e-05	-0.202656
Rv2972c	1066.79	-0.212652	0.0698046	-3.04639	0.00231608	0.00263447	-0.188189
Rv2974c	307.095	0.284184	0.107944	2.6327	0.00847084	0.00796344	0.219865
Rv2975c	678.444	0.0357605	0.13849	0.258216	0.79624	0.309055	0.0234715
Rv2978c	2094.43	-0.440721	0.0607826	-7.25077	4.14413e-13	3.00121e-12	-0.410682
Rv2979c	977.974	-0.443655	0.109746	-4.04255	5.28722e-05	9.58465e-05	-0.354497
Rv2980	255.284	0.193847	0.109301	1.77353	0.0761417	0.0492741	0.147022
Rv2983	189.928	0.57381	0.155901	3.68061	0.000232674	0.00035409	0.401022
Rv2989	1001.74	0.64934	0.0983528	6.60215	4.05237e-11	2.30837e-10	0.584765
Rv2990c	5934.85	-0.85778	0.0788587	-10.8774	1.47662e-27	4.09244e-26	-0.837839
Rv2991	629.031	-0.0473314	0.0598828	-0.790402	0.429293	0.196471	-0.0428687
Rv2993c	1936.31	0.0375435	0.0568898	0.659934	0.509296	0.223912	0.0343085
Rv2994	1762.96	0.223287	0.0721141	3.0963	0.00195949	0.00228846	0.196292
Rv2997	656.814	-0.0219411	0.0852681	-0.257319	0.796933	0.309176	-0.0181666
Rv2998	494.221	0.203762	0.138055	1.47595	0.139958	0.081103	0.135943
Rv2998A	58.6246	0.441893	0.424919	1.03995	0.298364	0.147511	0.0912493
Rv3000	627.682	-0.147611	0.0670346	-2.20201	0.027665	0.0213035	-0.131181
Rv3005c	6745.02	-0.221679	0.0642796	-3.44867	0.000563362	0.00077177	-0.199795
Rv3007c	2430.05	-0.188447	0.0530908	-3.54953	0.000385925	0.000558419	-0.174994
Rv3008	1497.29	-0.187333	0.0481206	-3.89298	9.90195e-05	0.000166322	-0.176184
Rv3013	252.02	0.151758	0.106063	1.43082	0.152481	0.0871339	0.116163
Rv3015c	291.445	0.402985	0.093966	4.28862	1.79784e-05	3.66997e-05	0.337783
Rv3023c	15954.1	-0.253628	0.0903505	-2.80715	0.00499817	0.00513416	-0.20957
Rv3026c	209.6	0.0547948	0.14095	0.388754	0.697458	0.280525	0.0355744
Rv3027c	588.594	-0.386798	0.132499	-2.91924	0.00350881	0.00379071	-0.275741
Rv3030	1332.55	0.167257	0.0748801	2.23366	0.0255054	0.0198798	0.144935
Rv3031	1323.69	0.263188	0.0778463	3.38087	0.000722565	0.000961534	0.227907
Rv3032	890.684	0.272666	0.0573869	4.75136	2.02053e-06	5.11971e-06	0.251732
Rv3032A	437.441	0.125665	0.0775451	1.62055	0.105115	0.0640742	0.107548
Rv3033	512.206	-0.263656	0.0800989	-3.29163	0.000996069	0.00127374	-0.226541
Rv3034c	2266.86	-0.156943	0.0555375	-2.82588	0.00471503	0.00487591	-0.144527
Rv3035	1543.69	0.160531	0.0625502	2.56644	0.0102748	0.00937797	0.144826
Rv3037c	573.204	0.387871	0.0892774	4.34456	1.39556e-05	2.97522e-05	0.329443
Rv3038c	3801.82	0.0901674	0.0401104	2.24798	0.0245775	0.0192817	0.0861483
Rv3040c	777.781	0.270184	0.0834378	3.23815	0.00120307	0.0014998	0.229601
Rv3041c	1078.92	0.166408	0.0616938	2.69733	0.00698978	0.00680698	0.150576
Rv3046c	1657.48	0.0960041	0.0697591	1.37622	0.168752	0.0946378	0.0843205
Rv3047c	918.336	-0.761815	0.115628	-6.58847	4.4438e-11	2.52137e-10	-0.693651
Rv3049c	10841.8	-0.117916	0.0576066	-2.04692	0.0406657	0.0294209	-0.107754
Rv3050c	12557.1	-0.171044	0.0731952	-2.33682	0.0194487	0.0158572	-0.149131
Rv3054c	208.823	0.241872	0.234711	1.03051	0.302772	0.149178	0.102789
Rv3055	392.802	0.251866	0.0896078	2.81075	0.00494255	0.00509154	0.208655
Rv3057c	3504.99	0.264051	0.0536647	4.92038	8.63774e-07	2.40783e-06	0.246006
Rv3058c	4092.36	-0.12546	0.0516339	-2.42981	0.0151069	0.0129132	-0.116631
Rv3060c	4722.19	-0.271092	0.113096	-2.39701	0.0165293	0.0138337	-0.204696
Rv3064c	683.44	-0.401426	0.0777329	-5.16417	2.41512e-07	7.43721e-07	-0.355099
Rv3066	495.462	0.235216	0.0728038	3.23082	0.00123436	0.00153281	0.206549
Rv3067	799.903	0.0180879	0.0739435	0.244618	0.806752	0.311708	0.0156242
Rv3069	473.464	0.0780453	0.0875759	0.891174	0.372836	0.176113	0.0641377
Rv3070	301.816	0.0738197	0.106217	0.694992	0.487061	0.215847	0.0561492
Rv3071	765.485	-0.0271867	0.0862631	-0.315161	0.75264	0.2975	-0.0224242
Rv3072c	404.177	-0.077075	0.080084	-0.962426	0.335836	0.161279	-0.0651868
Rv3073c	209.998	-0.188371	0.104392	-1.80445	0.0711604	0.04651	-0.145797
Rv3074	1193.8	0.123282	0.0489982	2.51605	0.0118677	0.0106166	0.115397
Rv3075c	3364.28	0.0369917	0.0745276	0.496349	0.619648	0.257949	0.0318941
Rv3076	335.716	-0.0264999	0.0987281	-0.268413	0.788382	0.307163	-0.0207782
Rv3077	1199.92	0.115075	0.0831849	1.38336	0.166553	0.0937625	0.0963775
Rv3079c	932.984	-0.136578	0.0923515	-1.47889	0.139169	0.0807432	-0.110524
Rv3081	1831.61	-0.124902	0.0597008	-2.09214	0.0364261	0.0267429	-0.113459
Rv3083	3321.64	0.268303	0.0623459	4.30345	1.68156e-05	3.48193e-05	0.244207
Rv3085	494.77	0.408603	0.108265	3.7741	0.000160589	0.000254886	0.324942
Rv3087	1651.2	0.505914	0.0667833	7.57545	3.57874e-14	2.91389e-13	0.469903
Rv3090	596.29	-0.164309	0.122852	-1.33746	0.181074	0.100524	-0.116949
Rv3091	1367.53	0.275367	0.0656524	4.19431	2.73701e-05	5.35211e-05	0.248376
Rv3092c	2145.86	0.231627	0.0680731	3.40261	0.000667443	0.000894792	0.206485
Rv3093c	247.078	0.10723	0.101646	1.05494	0.291455	0.14479	0.0833308
Rv3094c	132.482	0.362669	0.229049	1.58337	0.113338	0.0679747	0.162325
Rv3095	691.677	-0.0718773	0.0936128	-0.767815	0.442597	0.201027	-0.0576411
Rv3096	2091.98	-0.115488	0.057377	-2.0128	0.0441356	0.031543	-0.105597
Rv3098A	2076.9	-0.267594	0.0690715	-3.87416	0.000106993	0.000178055	-0.238649
Rv3098c	2882.18	0.0539859	0.494298	0.109218	0.91303	0.341332	0.00863818
Rv3099c	3163.36	0.0210311	0.0462063	0.455157	0.648996	0.266776	0.0197897
Rv3103c	527.293	0.326553	0.0872715	3.74181	0.000182698	0.000285885	0.276083
Rv3104c	2856.25	0.0377866	0.0603951	0.625657	0.53154	0.230735	0.0341645
Rv3108	505.489	-0.239397	0.0986767	-2.42607	0.0152632	0.0130075	-0.191023
Rv3113	199.295	0.0653712	0.214878	0.304225	0.760957	0.299965	0.0299236
Rv3114	322.513	-0.363095	0.139512	-2.60261	0.00925161	0.00856887	-0.248963
Rv3115	15954.1	-0.253628	0.0903505	-2.80715	0.00499817	0.00513416	-0.20957
Rv3120	1957.64	-0.080232	0.0583003	-1.37618	0.168765	0.0946378	-0.0730727
Rv3122	336.45	0.280662	0.183303	1.53114	0.125735	0.0740826	0.153088
Rv3123	556.697	0.0590149	0.0680677	0.867004	0.38594	0.181057	0.0520667
Rv3126c	191.789	-0.741963	0.153022	-4.84874	1.24245e-06	3.32498e-06	-0.597838
Rv3127	17128.4	-1.51835	0.187329	-8.10523	5.26449e-16	5.34298e-15	-1.48591
Rv3128c	12264.8	-3.31567	0.362324	-9.15113	5.6341e-20	9.22694e-19	-3.15728
Rv3129	5078.63	-3.51454	0.363674	-9.66398	4.28883e-22	7.53775e-21	-3.34716
Rv3131	24034.7	-0.550213	0.128682	-4.27576	1.90484e-05	3.87193e-05	-0.42642
Rv3134c	9747.03	-2.05058	0.152811	-13.419	4.68004e-41	3.21178e-39	-2.03073
Rv3136A	2568.8	0.294626	0.0881459	3.34248	0.000830339	0.00108733	0.246989
Rv3137	1050.38	0.447139	0.0553263	8.08185	6.37897e-16	6.21162e-15	0.422041
Rv3142c	3153.98	0.0489674	0.05564	0.880075	0.378818	0.178588	0.0449205
Rv3143	2711.67	0.148261	0.0695773	2.13089	0.0330985	0.0248183	0.130659
Rv3160c	15168.4	-0.0545493	0.0573356	-0.951403	0.3414	0.163678	-0.049796
Rv3161c	56785.6	-0.243483	0.089479	-2.72112	0.00650611	0.00641782	-0.201578
Rv3162c	636.231	0.322025	0.138736	2.32113	0.0202797	0.0164287	0.219169
Rv3163c	926.88	0.134027	0.0571696	2.34437	0.019059	0.015642	0.122716
Rv3165c	371.662	0.0453885	0.125563	0.36148	0.717741	0.286693	0.031636
Rv3166c	720.987	0.122652	0.079708	1.53877	0.123861	0.0732481	0.104121
Rv3167c	116.571	0.206337	0.20164	1.02329	0.30617	0.150364	0.101784
Rv3168	1670.24	-0.0939804	0.0933233	-1.00704	0.313915	0.153306	-0.0755371
Rv3169	1435.36	0.487139	0.0688934	7.0709	1.53928e-12	1.03662e-11	0.448643
Rv3172c	643.794	-0.556534	0.0763167	-7.29243	3.04406e-13	2.27307e-12	-0.511589
Rv3173c	2547.84	0.0535123	0.099427	0.538207	0.590434	0.249244	0.0418633
Rv3174	175.131	0.246675	0.191766	1.28633	0.198328	0.107981	0.128356
Rv3175	791.846	0.284297	0.0816793	3.48066	0.000500189	0.000698507	0.243591
Rv3177	490.355	-0.160731	0.111644	-1.43968	0.149958	0.085965	-0.120206
Rv3178	109.338	0.0885449	0.224725	0.394015	0.69357	0.279596	0.0387682
Rv3179	1051.18	-0.205537	0.0637174	-3.22576	0.0012564	0.00154892	-0.185329
Rv3180c	222.756	0.133782	0.124035	1.07858	0.280776	0.140905	0.094414
Rv3181c	212.678	-0.0267744	0.125951	-0.212578	0.831656	0.318428	-0.0186201
Rv3182	349.441	-0.181012	0.104306	-1.73539	0.0826722	0.0528125	-0.140031
Rv3183	107.22	0.469958	0.405996	1.15754	0.24705	0.128027	0.104242
Rv3184	1506.47	0.154329	0.324077	0.47621	0.633925	0.261625	0.0442796
Rv3185	7013.12	-0.138564	0.0827698	-1.67409	0.0941131	0.0583258	-0.116415
Rv3186	1506.47	0.154329	0.324077	0.47621	0.633925	0.261625	0.0442796
Rv3187	7011.49	-0.138814	0.0827639	-1.67723	0.0934978	0.0581556	-0.11663
Rv3188	641.304	0.768743	0.0844276	9.10536	8.59836e-20	1.39233e-18	0.737707
Rv3189	1189.67	0.23533	0.0728876	3.22868	0.00124364	0.00153714	0.206594
Rv3190A	3033.07	-0.169621	0.0581523	-2.91684	0.00353599	0.0038115	-0.15514
Rv3190c	2176.44	-0.277445	0.0422254	-6.57057	5.01232e-11	2.81075e-10	-0.265583
Rv3191c	3778.46	-0.415924	0.0618179	-6.72821	1.71767e-11	1.03576e-10	-0.385349
Rv3192	199.696	-0.0445963	0.113363	-0.393393	0.694029	0.27964	-0.0328394
Rv3193c	12277.2	-0.179943	0.0381332	-4.7188	2.3724e-06	5.9153e-06	-0.173014
Rv3194c	1841.04	-0.0330927	0.0798803	-0.414278	0.67867	0.275749	-0.0279749
Rv3195	503.679	-0.369242	0.100128	-3.68769	0.000226296	0.000346073	-0.3001
Rv3196	638.013	-0.456375	0.0780586	-5.84657	5.01825e-09	2.15886e-08	-0.407698
Rv3196A	481.213	-0.197291	0.0957143	-2.06125	0.0392796	0.0285758	-0.158449
Rv3197	14993.7	-0.347719	0.0432273	-8.04398	8.69688e-16	8.30047e-15	-0.333471
Rv3198A	833.779	-0.273072	0.0796972	-3.42636	0.000611723	0.000827793	-0.235247
Rv3200c	3129.14	-0.0245048	0.0419192	-0.584572	0.558836	0.240125	-0.0232994
Rv3201c	455.163	-0.692754	0.142454	-4.86302	1.1561e-06	3.12012e-06	-0.558447
Rv3202c	412.252	-0.887943	0.136629	-6.49894	8.08898e-11	4.43882e-10	-0.818891
Rv3204	975.243	-0.0455492	0.0904921	-0.50335	0.614718	0.256416	-0.0369585
Rv3205c	4013.41	0.154562	0.0587332	2.6316	0.00849846	0.0079842	0.141011
Rv3207c	5255.24	-0.198642	0.035452	-5.60311	2.10543e-08	8.20076e-08	-0.192092
Rv3208	2509.1	-0.132794	0.0609874	-2.17741	0.0294501	0.0224209	-0.1202
Rv3209	2108.43	-0.102581	0.0478468	-2.14396	0.0320365	0.024072	-0.0962465
Rv3210c	2231.81	-0.228312	0.0644547	-3.54221	0.000396783	0.000571833	-0.205778
Rv3212	6381.2	0.097932	0.0755186	1.29679	0.194703	0.106571	0.0843021
Rv3213c	6100.69	0.110891	0.0443773	2.49882	0.0124606	0.0110273	0.104961
Rv3216	1058.99	-0.219545	0.0591052	-3.71449	0.000203616	0.000317239	-0.200896
Rv3217c	465.03	-0.0185279	0.0699309	-0.264946	0.791051	0.30787	-0.0162317
Rv3218	1271.15	0.0144354	0.0539009	0.267813	0.788843	0.307259	0.0133044
Rv3220c	7367.8	-0.0224541	0.0410389	-0.547143	0.58428	0.247443	-0.0213927
Rv3222c	1791.66	0.185236	0.0549339	3.37197	0.000746319	0.000986766	0.171124
Rv3224	3559.92	0.282121	0.0626772	4.50117	6.75792e-06	1.52654e-05	0.256873
Rv3224A	235.038	0.430392	0.164865	2.61058	0.00903889	0.00840969	0.26804
Rv3224B	356.118	0.401027	0.147993	2.70977	0.00673303	0.00660549	0.267565
Rv3225c	2408.21	0.0894015	0.0537688	1.6627	0.0963718	0.0594762	0.0825273
Rv3226c	553.491	-0.0369168	0.0665468	-0.55475	0.579066	0.245885	-0.0327224
Rv3228	3101.44	0.025618	0.0659809	0.388264	0.69782	0.280525	0.0227468
Rv3230c	10139.9	-0.17858	0.0952634	-1.87459	0.0608485	0.0410357	-0.143384
Rv3231c	1431.56	-0.0909186	0.057083	-1.59274	0.111217	0.0670362	-0.0831326
Rv3233c	1461.05	-0.140377	0.0611839	-2.29434	0.0217709	0.0174139	-0.127035
Rv3235	1117.73	0.153672	0.0620279	2.47747	0.0132317	0.0115571	0.138806
Rv3236c	2551.27	0.0894922	0.0353595	2.53092	0.0113763	0.0102278	0.0863543
Rv3237c	1311.61	-0.0190376	0.049952	-0.381118	0.703116	0.282102	-0.0177397
Rv3238c	1413.86	-0.0595715	0.0547587	-1.08789	0.276643	0.13964	-0.0547981
Rv3239c	3075.06	0.0583603	0.0389077	1.49997	0.133623	0.0780602	0.0558809
Rv3241c	9664.52	0.0843646	0.053153	1.5872	0.112466	0.0676194	0.078002
Rv3242c	291.723	0.158251	0.0914633	1.73021	0.0835921	0.0533056	0.128756
Rv3243c	1349.98	0.0192965	0.0471283	0.409446	0.682212	0.276645	0.0181148
Rv3249c	3180.42	0.075233	0.123293	0.610199	0.54173	0.234594	0.0530493
Rv3253c	1219.41	-0.0882564	0.0527735	-1.67236	0.0944529	0.058447	-0.0816949
Rv3254	2782.53	-0.0520952	0.0403724	-1.29037	0.196923	0.107459	-0.0497182
Rv3256c	1317.63	0.400329	0.0819539	4.88481	1.03529e-06	2.83657e-06	0.349382
Rv3258c	1008.31	0.0506529	0.107311	0.472021	0.636912	0.262557	0.0383101
Rv3259	2323.95	-0.632449	0.103593	-6.10514	1.02714e-09	4.9674e-09	-0.55755
Rv3263	1355.22	-0.418508	0.0748987	-5.58765	2.30164e-08	8.82196e-08	-0.374519
Rv3267	4419.62	-0.15172	0.0477516	-3.17728	0.00148663	0.00180344	-0.142609
Rv3268	2487.57	0.0858147	0.0707121	1.21358	0.224909	0.119386	0.0750943
Rv3269	4195.37	0.257618	0.143673	1.79309	0.0729587	0.0475559	0.16895
Rv3271c	3587.8	0.618439	0.0814445	7.59339	3.11645e-14	2.59615e-13	0.572271
Rv3272	2417.07	0.117421	0.0459866	2.55338	0.0106684	0.00968812	0.110729
Rv3277	2184.64	-0.321937	0.049509	-6.5026	7.89446e-11	4.35911e-10	-0.304219
Rv3278c	2456.61	-0.515175	0.0617732	-8.33978	7.44288e-17	8.38006e-16	-0.484468
Rv3282	1408.4	0.147585	0.0897671	1.64409	0.100158	0.0615018	0.120775
Rv3284	2625.46	-0.00421572	0.0537692	-0.0784039	0.937507	0.347776	-0.00388677
Rv3289c	3212.71	-1.42932	0.124984	-11.436	2.76375e-30	8.85122e-29	-1.41461
Rv3292	1192.89	-0.00130234	0.059243	-0.021983	0.982462	0.357731	-0.0011814
Rv3294c	413.777	0.10413	0.213649	0.487387	0.625984	0.260286	0.0480388
Rv3295	7251.44	0.12057	0.0516777	2.33312	0.0196419	0.0160019	0.112052
Rv3300c	915.162	0.254071	0.0645017	3.93898	8.18303e-05	0.000141745	0.229486
Rv3304	765.45	-0.161492	0.0630522	-2.56124	0.0104299	0.00949543	-0.145474
Rv3311	3494.55	-0.176699	0.0414401	-4.26395	2.00845e-05	4.04829e-05	-0.168706
Rv3312A	2609.28	-0.0831395	0.0585354	-1.42033	0.155512	0.0886899	-0.0756735
Rv3312c	1518.33	0.013924	0.0528564	0.263432	0.792218	0.308157	0.0128712
Rv3322c	344.451	0.279418	0.0927913	3.01126	0.00260169	0.00293158	0.229611
Rv3324A	45.1569	0.117462	0.254703	0.461171	0.644676	0.265454	0.0449877
Rv3325	1506.47	0.154329	0.324077	0.47621	0.633925	0.261625	0.0442796
Rv3326	7021.17	-0.139295	0.0837947	-1.66233	0.0964464	0.0594762	-0.116582
Rv3327	1641	0.120168	0.152921	0.785816	0.431975	0.197447	0.0740305
Rv3329	1977.11	-0.0423574	0.0417586	-1.01434	0.310421	0.151908	-0.0402938
Rv3333c	173.494	0.3066	0.145042	2.11387	0.0345263	0.0255959	0.201886
Rv3334	1748.44	-0.0301904	0.0995589	-0.303242	0.761705	0.300096	-0.023591
Rv3335c	1668.18	-0.00743592	0.0585366	-0.12703	0.898917	0.337193	-0.00676003
Rv3337	355.606	0.0526454	0.101292	0.519741	0.603244	0.253021	0.0408612
Rv3338	1110.89	0.114663	0.101137	1.13374	0.256904	0.132041	0.0893444
Rv3342	1178.77	0.0689761	0.0525547	1.31246	0.189364	0.104242	0.0638579
Rv3346c	624.656	0.217209	0.163723	1.32669	0.184611	0.102091	0.128614
Rv3348	1247.99	0.0586874	0.0544366	1.07809	0.280994	0.140905	0.0540339
Rv3349c	244.092	0.223465	0.145764	1.53306	0.125262	0.0738946	0.144242
Rv3351c	193.097	-0.233244	0.153947	-1.51509	0.12975	0.0760129	-0.145078
Rv3352c	79.2775	0.133136	0.200967	0.662478	0.507665	0.223399	0.0653326
Rv3353c	72.5023	-0.0368413	0.233005	-0.158114	0.874367	0.330652	-0.0154994
Rv3354	594.124	0.232665	0.0836949	2.77992	0.00543728	0.00551447	0.196581
Rv3355c	763.537	0.154265	0.137151	1.12478	0.260681	0.133459	0.102701
Rv3359	631.888	0.0115076	0.0631662	0.18218	0.855441	0.32495	0.0103112
Rv3360	426.697	0.149643	0.0803459	1.86248	0.0625351	0.0419181	0.126971
Rv3361c	798.449	0.0641332	0.0589623	1.0877	0.276728	0.13964	0.0582699
Rv3362c	1186.96	-0.0882257	0.0543013	-1.62474	0.104217	0.0636419	-0.0813166
Rv3363c	318.635	0.315895	0.0852123	3.70715	0.000209606	0.000325165	0.268571
Rv3364c	328.843	0.412862	0.105762	3.90368	9.47411e-05	0.000160256	0.331967
Rv3365c	4902.23	0.21321	0.0506362	4.21062	2.54674e-05	5.00039e-05	0.199528
Rv3368c	217.895	0.199754	0.126406	1.58025	0.114049	0.0682576	0.140535
Rv3369	306.676	0.437509	0.102391	4.27291	1.92938e-05	3.91629e-05	0.358846
Rv3371	1906.55	0.0408323	0.0575894	0.709026	0.478309	0.21282	0.0372377
Rv3376	5929.45	-0.239797	0.0419875	-5.71116	1.12205e-08	4.59396e-08	-0.229251
Rv3377c	4938.59	-0.344892	0.0571315	-6.03681	1.57193e-09	7.33146e-09	-0.320691
Rv3378c	862.141	-0.444361	0.0615437	-7.22025	5.18921e-13	3.7385e-12	-0.413549
Rv3380c	7012.01	-0.138824	0.0827408	-1.67782	0.0933821	0.0581087	-0.116649
Rv3381c	1506.47	0.154329	0.324077	0.47621	0.633925	0.261625	0.0442796
Rv3386	228.814	0.0228834	0.168693	0.135651	0.892097	0.33542	0.0130145
Rv3387	278.879	0.104147	0.159177	0.654285	0.512928	0.224823	0.0622024
Rv3394c	185.599	0.0427747	0.115969	0.368846	0.712242	0.284971	0.0311334
Rv3395A	437.25	-0.274302	0.0932294	-2.94223	0.00325863	0.0035671	-0.224844
Rv3395c	249.72	-0.00722658	0.16988	-0.0425393	0.966069	0.353638	-0.00408613
Rv3399	392.909	-0.193241	0.10584	-1.82578	0.0678835	0.044838	-0.148739
Rv3400	1162.81	-0.0238355	0.0669348	-0.356101	0.721765	0.287981	-0.0210965
Rv3401	2919.86	0.181038	0.0436621	4.14634	3.37837e-05	6.49175e-05	0.172024
Rv3402c	876.32	-0.0414304	0.119603	-0.3464	0.729042	0.290322	-0.0296661
Rv3403c	2093.27	-0.0801811	0.0686383	-1.16817	0.242739	0.126155	-0.0706492
Rv3404c	2184.13	-0.17968	0.0465256	-3.86196	0.000112481	0.000186645	-0.169586
Rv3405c	836.447	0.0908948	0.0727905	1.24872	0.211769	0.113921	0.0789821
Rv3406	360.913	-0.0412947	0.102848	-0.401511	0.688044	0.278302	-0.0318291
Rv3412	7826.48	-0.216965	0.0579187	-3.74602	0.000179661	0.000282195	-0.199169
Rv3413c	5432.88	-0.0770442	0.0670756	-1.14862	0.250714	0.129414	-0.0682353
Rv3415c	121.188	0.405179	0.149986	2.70144	0.00690401	0.00674111	0.268218
Rv3421c	520.31	0.491121	0.106026	4.63208	3.62018e-06	8.75386e-06	0.404456
Rv3422c	443.179	0.340436	0.0791909	4.29893	1.71623e-05	3.54862e-05	0.296662
Rv3424c	1911.56	-0.772442	0.0708557	-10.9016	1.13217e-27	3.2633e-26	-0.751924
Rv3427c	617.478	-0.0897614	0.20544	-0.436922	0.662168	0.27079	-0.0429932
Rv3428c	144.565	0.840139	0.677892	1.23934	0.215219	0.115489	0.094698
Rv3430c	1528.53	-0.184681	0.0743075	-2.48536	0.012942	0.0113453	-0.160581
Rv3431c	3305.86	0.168125	0.0742033	2.26573	0.0234678	0.0185637	0.146042
Rv3433c	347.72	0.595918	0.115702	5.15047	2.5983e-07	7.95031e-07	0.496758
Rv3434c	1442.15	-0.25057	0.0636351	-3.93762	8.2295e-05	0.000142379	-0.226839
Rv3435c	3758.97	-0.0702756	0.0503875	-1.3947	0.163106	0.0921391	-0.0654494
Rv3437	590.66	0.186228	0.086719	2.14749	0.0317546	0.0239203	0.154768
Rv3438	1243.47	0.212876	0.0784856	2.7123	0.00668184	0.00656421	0.182883
Rv3439c	610.78	0.356571	0.0610887	5.83693	5.31711e-09	2.27385e-08	0.328614
Rv3440c	224.738	0.154164	0.108735	1.4178	0.15625	0.0889351	0.116683
Rv3446c	65.5989	0.658318	0.419884	1.56786	0.116914	0.0696815	0.14735
Rv3453	231.547	-0.18552	0.13981	-1.32694	0.184528	0.102087	-0.122449
Rv3454	799.413	-0.299009	0.0865521	-3.45467	0.000550971	0.000756953	-0.252308
Rv3463	737.002	-0.195017	0.107926	-1.80696	0.0707688	0.046275	-0.148809
Rv3466	1017.18	-0.212643	0.13023	-1.63282	0.102506	0.0627036	-0.147289
Rv3467	3513.28	0.403	0.361589	1.11452	0.265054	0.135026	0.103586
Rv3468c	369.868	0.0633747	0.171119	0.370355	0.711118	0.284679	0.0356718
Rv3471c	60.1152	0.16318	0.275862	0.591528	0.554167	0.238688	0.057187
Rv3472	433.383	0.134063	0.0874746	1.5326	0.125375	0.0739309	0.110583
Rv3474	1506.47	0.154329	0.324077	0.47621	0.633925	0.261625	0.0442796
Rv3475	7024.02	-0.138293	0.0836403	-1.65343	0.0982433	0.0603777	-0.115804
Rv3479	17715.3	-0.0127683	0.0422238	-0.302396	0.76235	0.300267	-0.0121311
Rv3480c	5448.79	0.113575	0.037158	3.05655	0.00223903	0.00256709	0.109241
Rv3481c	398.759	0.123893	0.0839257	1.47623	0.139883	0.0810925	0.103529
Rv3482c	1968.78	0.000436494	0.0484779	0.00900398	0.992816	0.359864	0.000408311
Rv3483c	1142.61	0.079962	0.0540213	1.4802	0.138821	0.080574	0.0737428
Rv3485c	2366.31	-0.154808	0.0667656	-2.31868	0.0204124	0.0165269	-0.137759
Rv3486	5577.08	-0.247125	0.0522219	-4.73221	2.22086e-06	5.54705e-06	-0.230814
Rv3488	210.471	0.0492609	0.141635	0.347802	0.727989	0.289983	0.0318725
Rv3489	1584.33	-0.00715366	0.149111	-0.0479754	0.961736	0.3525	-0.00446458
Rv3491	5362.27	-0.143077	0.0562134	-2.54525	0.01092	0.00989791	-0.131418
Rv3492c	2830.36	-0.0145605	0.052485	-0.277421	0.781457	0.305207	-0.0134735
Rv3493c	1721.77	0.25089	0.0739446	3.39294	0.000691463	0.000924413	0.219841
Rv3502c	962.414	0.0611723	0.0710935	0.860449	0.389542	0.18239	0.0534163
Rv3510c	865.544	-0.065521	0.0669296	-0.978954	0.327603	0.158168	-0.058038
Rv3517	260.808	-0.261567	0.152248	-1.71804	0.0857898	0.0543703	-0.164871
[truncated: 1,986 more rows]
